# Supplementary material for: Immune‐mediated ECM depletion improves tumour perfusion and payload delivery
Source: PubMed Central journal article supplement (PMC6895610; doi:10.15252/emmm.201910923), 2019-11-11
Supplement: EMMM-11-e10923-s001.pdf [file EMMM-11-e10923-s001.pdf]

## Table of Content Appendix

**Appendix Table S1:** Mean tumour stiffness/elasticity measured by OCT-microelastography

**Appendix Fig S1.** Phage library biopanning for peptides recognising tumour ECM and CSG binding specificity.

**Appendix Fig S2.** Purification of recombinant TNF $\alpha$  and TNF $\alpha$ -CSG, and their bioactivity in vitro and in vivo. **(A)** SDS-PAGE analysis indicating: M. Molecular weight markers, 1.

**Appendix Fig S3.** Immune-mediated effects of TNF $\alpha$ -CSG therapy.

**Appendix Fig S4.** TNF $\alpha$ -CSG therapy reduces hypoxia and lung metastasis.

**Appendix Table S1:** Mean tumour stiffness/elasticity measured by OCT-microelastography (on day 5) in response to consecutive daily i.v. injection of TNF $\alpha$ -CSG (2  $\mu$ g) or CSG control (0.8  $\mu$ g) for 4 days.

| Tumour    | Treatment           | Mean [kPa] | $\pm$ StDev |
|-----------|---------------------|------------|-------------|
| 4T1       | CSG 1               | 22.14      | 3.37        |
|           | CSG 2               | 10.49      | 3.15        |
|           | CSG 3               | 15.21      | 3.98        |
|           |                     | 15.95      | 3.383       |
| 4T1       | TNF $\alpha$ -CSG 1 | 13.55      | 2.31        |
|           | TNF $\alpha$ -CSG 2 | 16.17      | 2.66        |
|           | TNF $\alpha$ -CSG 3 | 17.96      | 1.90        |
|           |                     | 15.89      | 1.281       |
| RIP1-Tag5 | CSG 1               | 20.53      | 2.91        |
|           | CSG 2               | 6.25       | 2.12        |
|           | CSG 3               | 6.12       | 2.68        |
|           |                     | 10.97      | 4.782       |
| RIP1-Tag5 | TNF $\alpha$ -CSG 1 | 5.17       | 1.86        |
|           | TNF $\alpha$ -CSG 2 | 8.81       | 1.95        |
|           | TNF $\alpha$ -CSG 3 | 3.19       | 1.78        |
|           |                     | 5.723      | 1.646       |

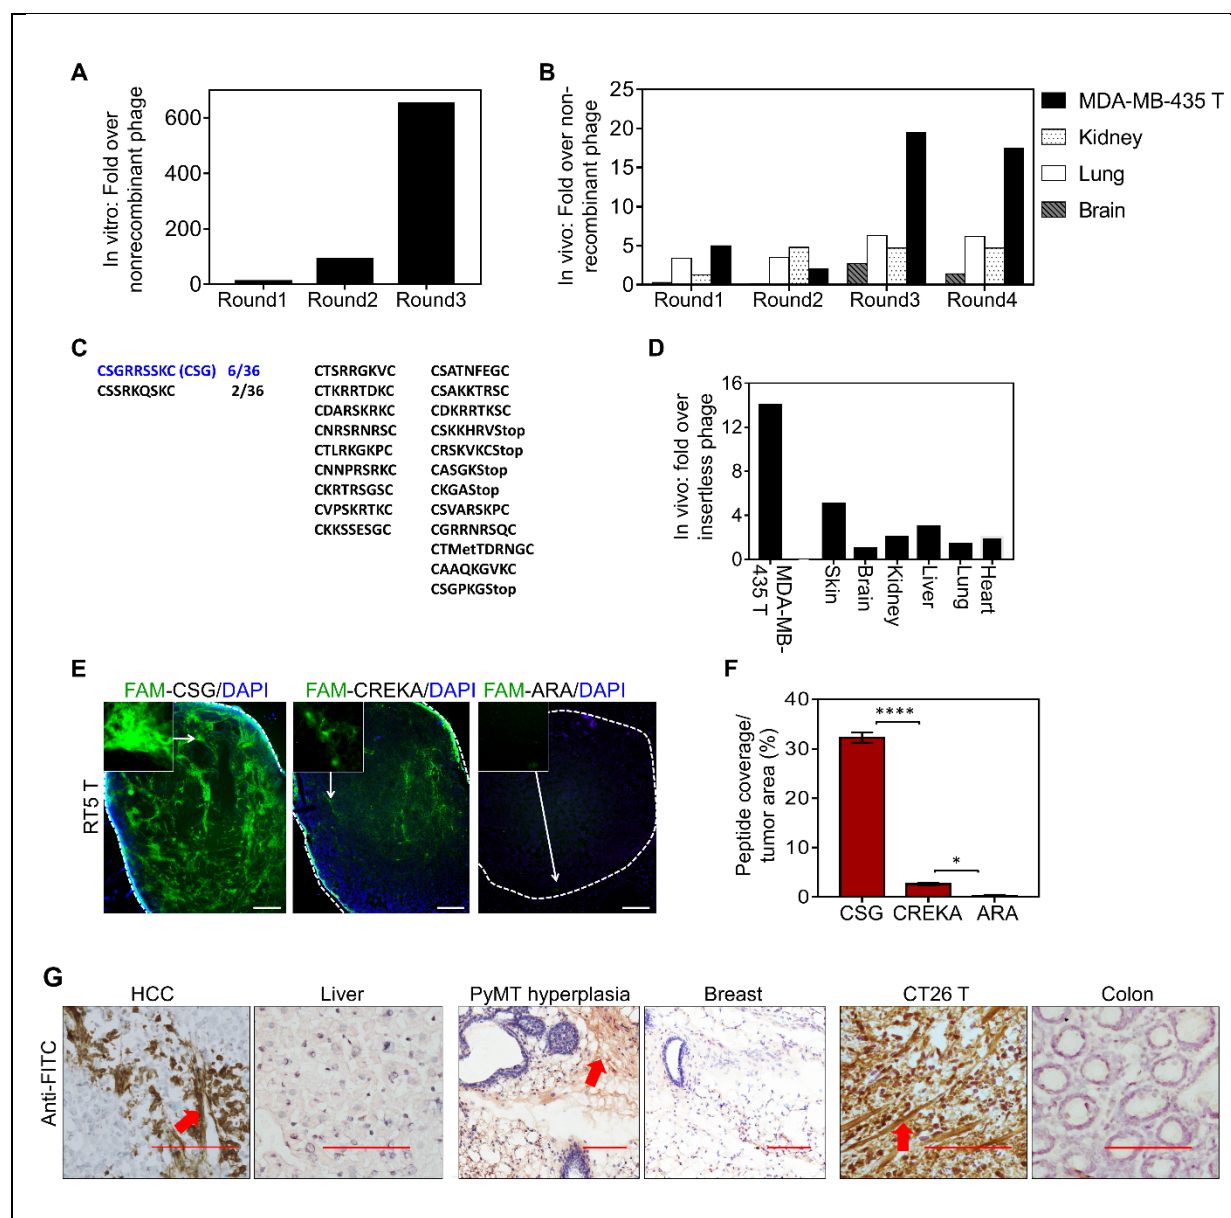

**Appendix Fig S1.** Phage library biopanning for peptides recognising tumour ECM and CSG binding specificity. **(A)** *In vitro* biopanning on Matrigel™ was performed using a cyclic peptide phage library encoding peptides with the general structure CX7C where X is any amino acid. Three rounds of selection yielded a phage pool that bound to Matrigel™ approximately 650-fold over control, non-recombinant phage. **(B)** The enriched phage pool from the third *in vitro* round was subsequently subjected to 4 rounds of *in vivo* screening in mice bearing MDA-MB-435 human breast cancer xenograft tumours (T). **(C)** Insert sequences of randomly picked phage colonies from the *in vivo*-selected phage pool. **(D)** The phage displaying the dominant CSGRRSSKC (CSG) peptide sequence was tested for homing to MDA-MB-435 tumours *in vivo*. **(E and F)** Acetone-fixed RIP1-Tag5 tumour tissue cross sections (RT5 T, 8 μm) were incubated with the indicated peptides (5 μM) for 20 min. Microscopic images show peptide binding (FAM<sup>+</sup>, green), and the bar chart shows mean ± SEM of percent peptide coverage (FAM<sup>+</sup>)/ tumour area (n=5 tumours; \*P<0.05, \*\*\*\*

$P < 0.0001$  by one-way ANOVA test with Tukey correction). **(G)** FAM-CSG was i.v. injected into mice bearing tumours, and tissues were collected with perfusion after 1 h. Representative micrographs compare CSG binding detected by immunoperoxidase staining with anti-FITC antibody in ALB-Tag hepatocellular carcinoma (HCC) and non-transformed liver, early hyperplastic PyMT-MMTV breast carcinoma and normal breast tissue from a wildtype mouse, and transplant murine CT26 and normal colon. Scale bar: 100  $\mu\text{m}$ . Arrows: CSG binding around tumour ECM.

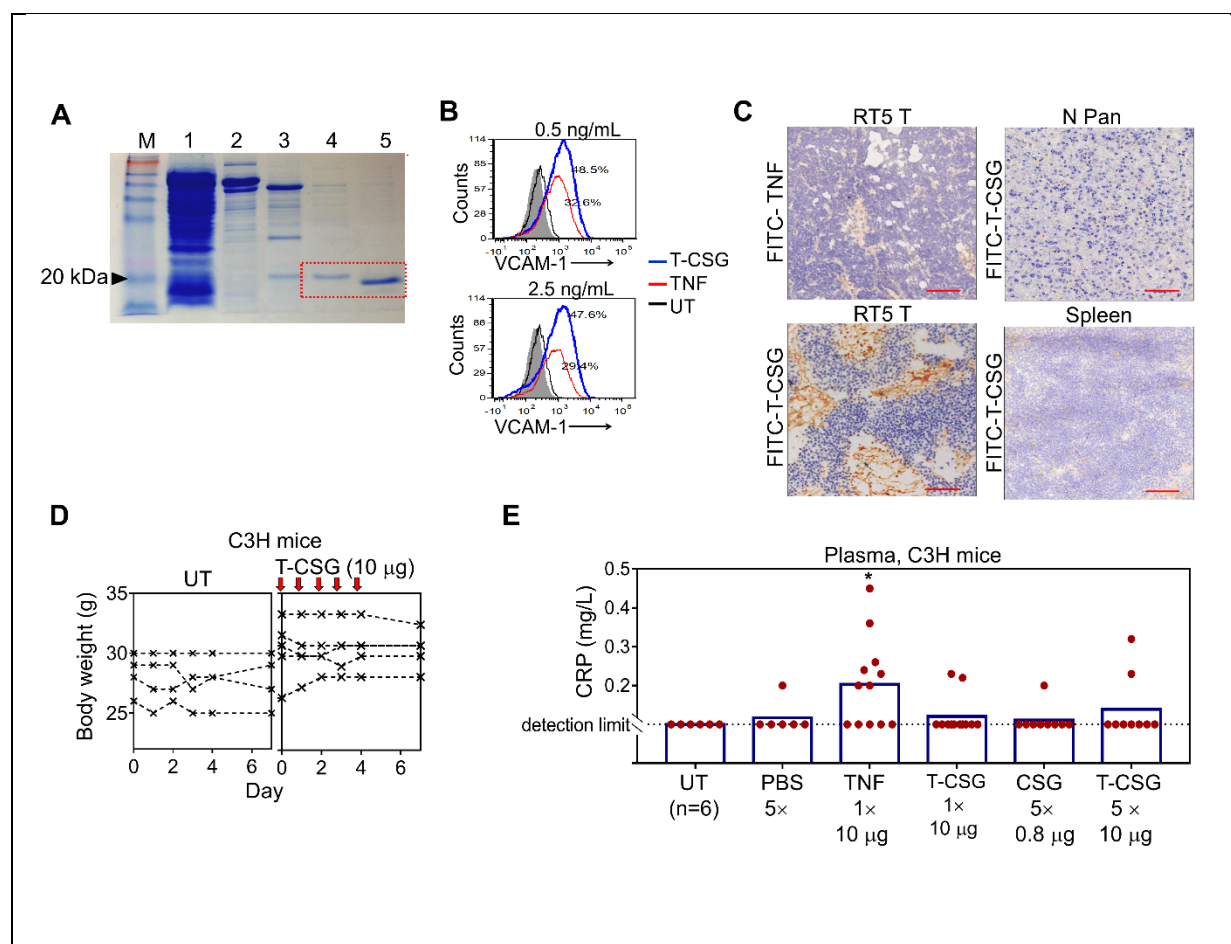

**Appendix Fig S2.** Purification of recombinant TNF $\alpha$  and TNF $\alpha$ -CSG, and their bioactivity in vitro and in vivo. **(A)** SDS-PAGE analysis indicating: M. Molecular weight markers, 1. Bacterial lysate, 2. His-Nus-tagged TNF $\alpha$ -CSG fusion protein purified using a Ni-NTA column, 3. TNF $\alpha$ -CSG cleaved off from His-NusA tag after TEV digestion, 4. Purified TNF $\alpha$ -CSG (18.9 kDa), and 5. Purified TNF $\alpha$  (17.7 kDa). **(B)** Brain endothelial cells (bEnd5) were incubated for 2 h with TNF $\alpha$  (TNF) and TNF $\alpha$ -CSG (T-CSG) at the indicated concentrations. Induction of VCAM-1 was analyzed by FACS. **(C)** RIP1-Tag5 mice ( $n=3$  mice/group) were i.v. injected with 100  $\mu$ g of FITC-labeled TNF $\alpha$ -CSG or TNF $\alpha$ . Tissues were collected 1 h later, and stained with anti-FITC-HRP antibody to detect the FITC-labeled proteins. Detection of the labeled proteins (brown) against haematoxylin staining (blue) in tumours (RT5 T), normal pancreas (N Pan) and spleen. Scale bar: 100  $\mu$ m. **(D)** Graph plots of body weight (g) of individual healthy C3H mouse before TNF $\alpha$ -CSG treatment (day 0) and daily during treatment until day 7. Body weights of untreated mice (UT) at indicated time points were compared in parallel. **(E)** Systemic toxicity profile of TNF $\alpha$  and TNF $\alpha$ -CSG assessed by i.v. injection of indicated compounds in normal C3H mice (9 - 11 weeks of age). Blood samples were collected retro-orbitally, 5 h after a single dose injection or 2 days after 5 daily doses. The levels of plasma C reactive protein (CRP) were measured as indicator of

inflammation. Elevated CRP levels in 7/12 mice treated with TNF $\alpha$  (58%) when compared to other groups (\* $P$ <0.05, nonparametric test). The plasma CRP levels in both TNF $\alpha$ -CSG groups were not significantly different compared to the control PBS or CSG-treated groups (n=6 - 12 mice/group).

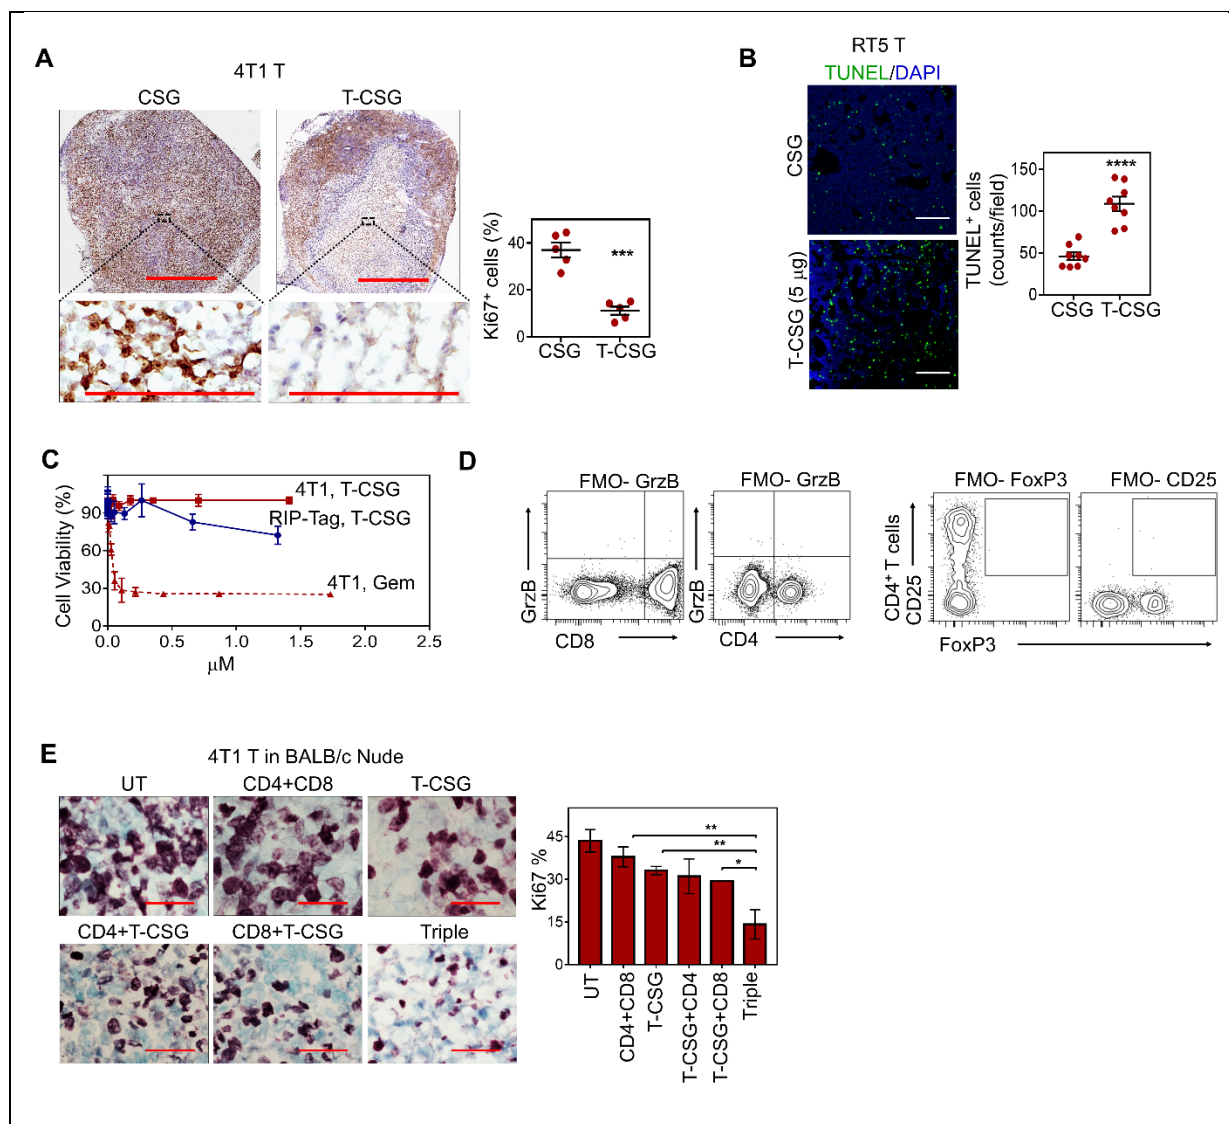

**Appendix Fig S3.** Immune-mediated effects of TNF $\alpha$ -CSG therapy. **(A)** Left: Ki67 staining (brown, counter-stained with hematoxylin) of 4T1 tumours in syngeneic BALB/c mice treated with indicated compounds. Scale bar: 2 mm (top) and 200  $\mu$ m (bottom). Right: Quantification of Ki67<sup>+</sup> cells in individual tumours and mean  $\pm$  SEM (n=5; \*\*\*P<0.001 by Student's *t* test). **(B)** Left: TUNEL staining of RIP1-Tag5 tumours treated with 5 daily injections of indicated compounds. Scale bar: 100  $\mu$ m. Right: Quantification of mean TUNEL<sup>+</sup> cell counts in individual tumours and mean  $\pm$  SEM (n=3; \*P<0.05 by Student's *t* test). **(C)** Cultured 4T1 tumour cells and malignant pancreatic beta cells derived from RIP-Tag mice were incubated in triplicates with indicated TNF $\alpha$ -CSG doses. Treatment of 4T1 tumour cells with gemcitabine (Gem) is shown as a control. MTT assays were performed after 48 h. **(D)** Gating strategies for FACS detection of cytotoxic (Granzyme B<sup>+</sup>) CD8<sup>+</sup> and CD4<sup>+</sup> T cells and regulatory (FOXP3<sup>+</sup>, CD25<sup>+</sup>) CD4<sup>+</sup> T cells. All cells were gated on live CD3<sup>+</sup> population. **(E)** Comparison of Ki67 staining of 4T1 tumours in immunodeficient BALB/c Nude mice treated with TNF $\alpha$ -CSG alone or in combination with adoptive transfer of

CD4<sup>+</sup> or CD8<sup>+</sup> T cells, or both. Ki67 staining of tumours in the control untreated (UT) and combined CD4<sup>+</sup> and CD8<sup>+</sup> T cells were also compared. Treatment schedule for each agent is shown in Fig 8A. Left: Micrographs show Ki67<sup>+</sup> cells (purple) counter-stained with methyl green in tumours from the indicated groups. Scale bar: 40  $\mu$ m. Right: Bar charts show mean  $\pm$  SEM of Ki67<sup>+</sup> fractions/field (n=3; \* $P$ <0.05 and \*\* $P$ <0.005 by one-way ANOVA test).



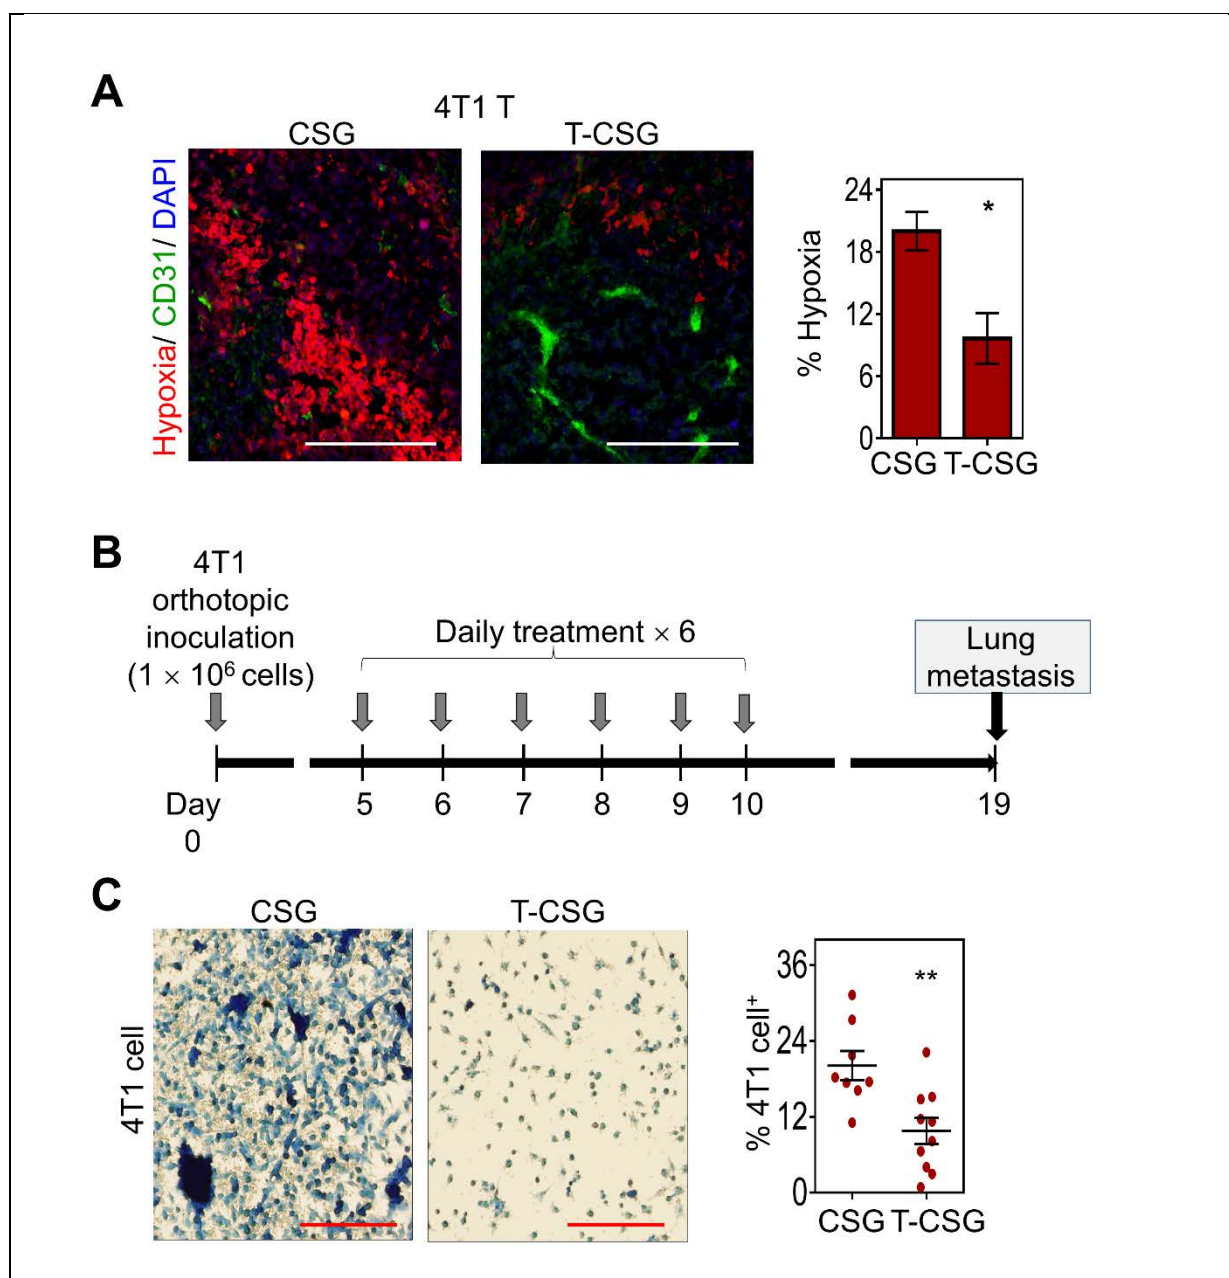

**Appendix Fig S4.** TNF $\alpha$ -CSG therapy reduces hypoxia and lung metastasis. **(A)** Left: Micrographs show tumour hypoxia (red) relative to blood vessels (CD31, green) in 4T1 tumours treated with 5 daily injections of indicated compounds. Scale bar: 50  $\mu$ m. Right: The bar chart shows mean  $\pm$  SEM of hypoxia<sup>+</sup> staining (n=3; \* $P$ <0.05 by Student's  $t$  test). **(B)** Schedule depicting TNF $\alpha$ -CSG treatment and lung metastasis assay. Mice were inoculated orthotopically with  $1 \times 10^6$  4T1 cells and treated with 6 daily doses of 10  $\mu$ g TNF $\alpha$ -CSG or 0.8  $\mu$ g CSG on day 5 post-inoculation. The mice were euthanised on day 19 post-inoculation and lungs were harvested for performing colonic assay (counts of colony outgrowth *in vitro* based on 4T1 cells resistance to 6-thioguanine). **(C)** Left: Representative micrographs of cell colonies stained with methylene blue. Scale bar: 100  $\mu$ m. Right: Fractions of 4T1 cell<sup>+</sup> /lung and mean  $\pm$  SEM (n=8-10; \*\* $P$ <0.005 by Student's  $t$  test).
