# Supplementary material for: Immune‐mediated ECM depletion improves tumour perfusion and payload delivery
Source: PubMed Central journal article supplement (PMC6895610; doi:10.15252/emmm.201910923), 2019-11-11
Supplement: EMMM-11-e10923-s003.pdf [file EMMM-11-e10923-s003.pdf]

Figure 1B: FAM-CSG homing detected with anti-FITC HRP

RIP1-Tag5 tumour

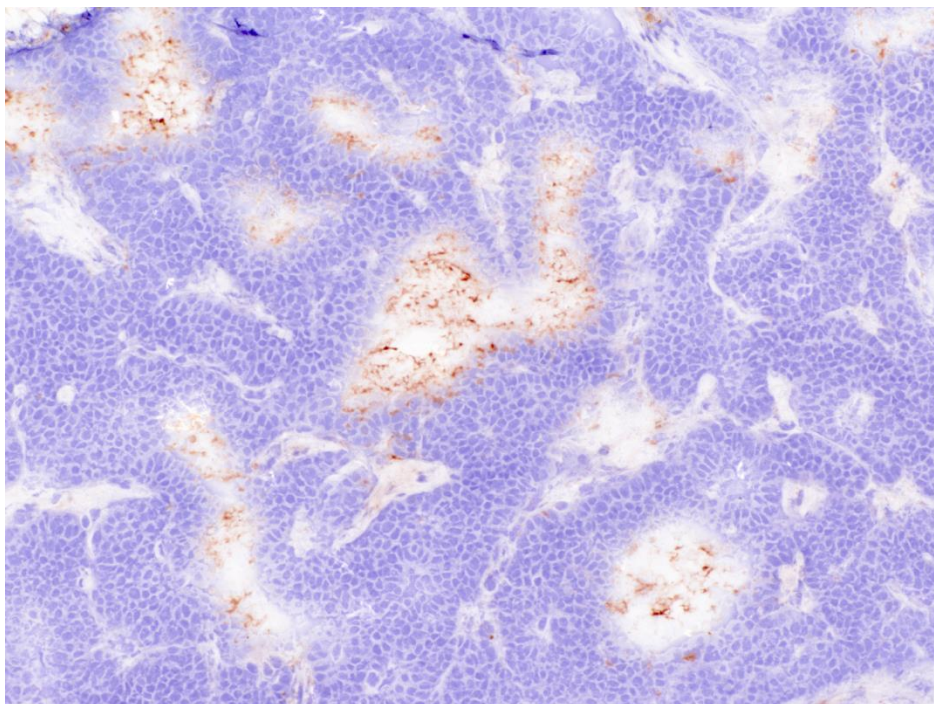

4T1 tumour

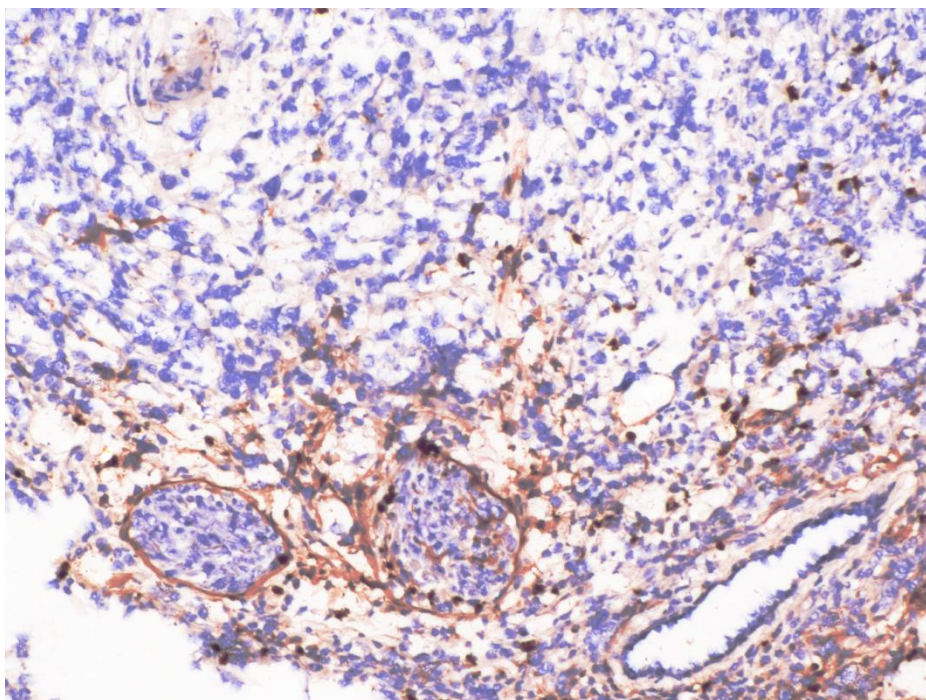

Figure 1B: FAM-CSG homing detected with anti-FITC HRP

Kidney

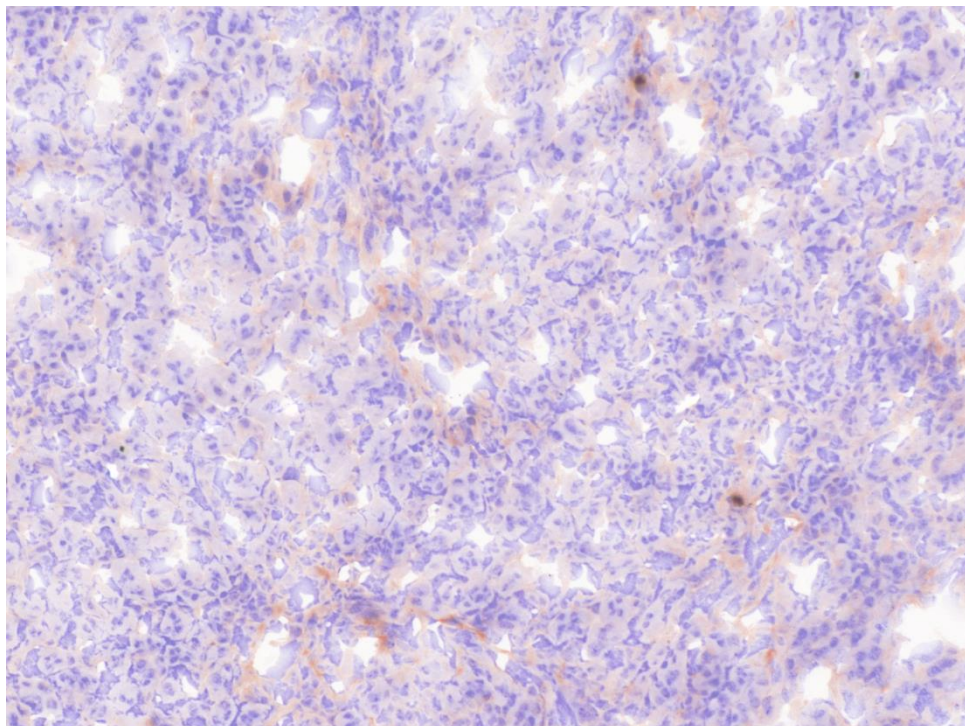

Intestine

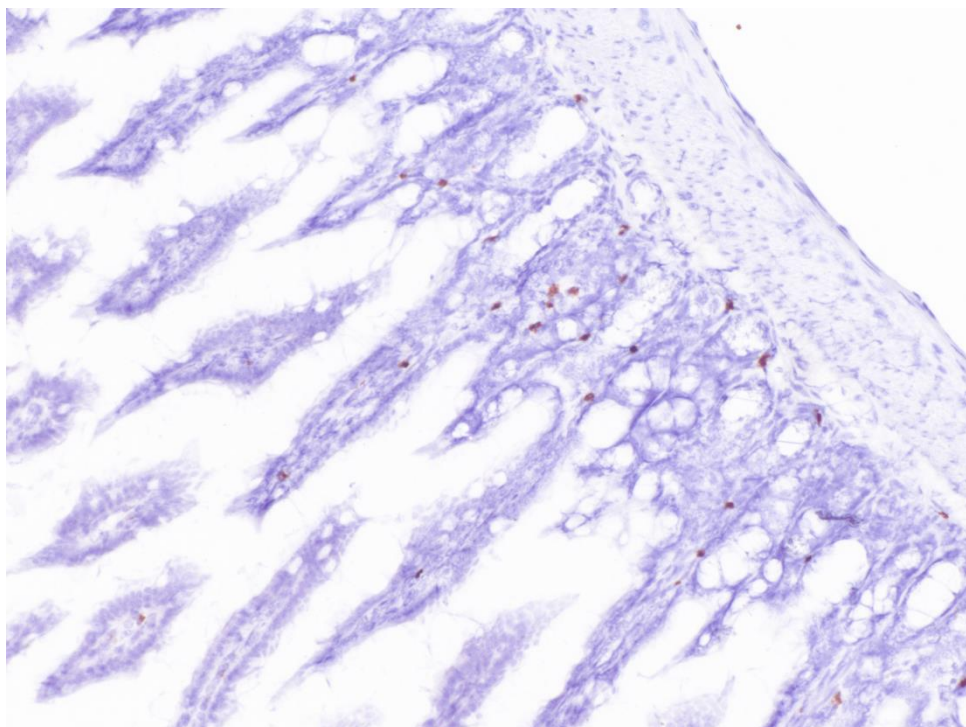

Figure 1B: FAM-CSG homing detected with anti-FITC HRP

Liver

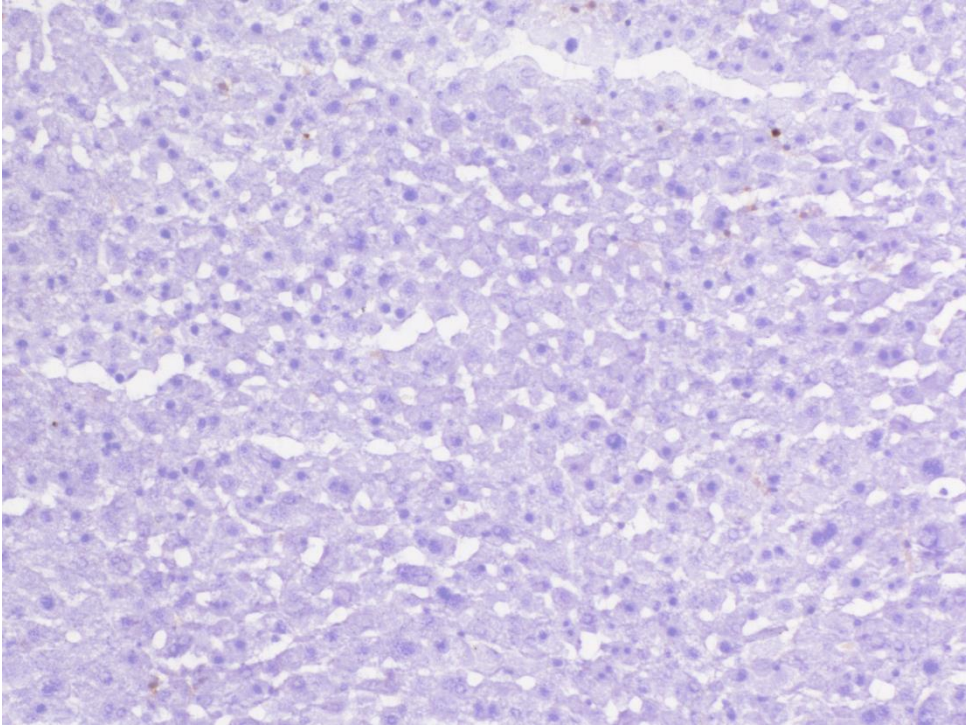

Muscle

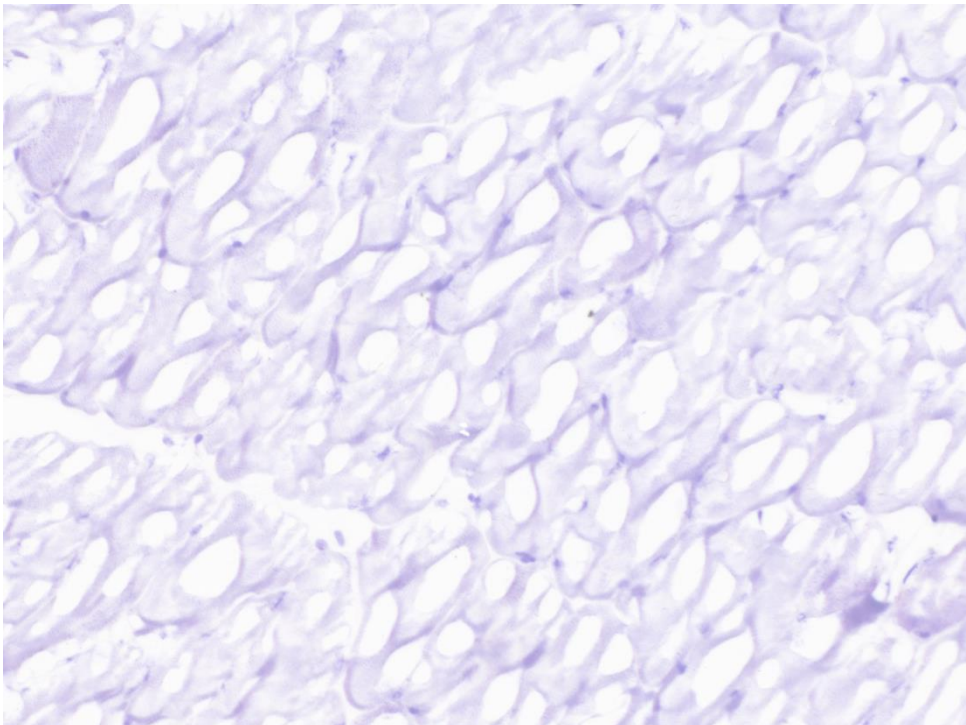

Figure 1B: FAM-CSG homing detected with anti-FITC HRP

Spleen

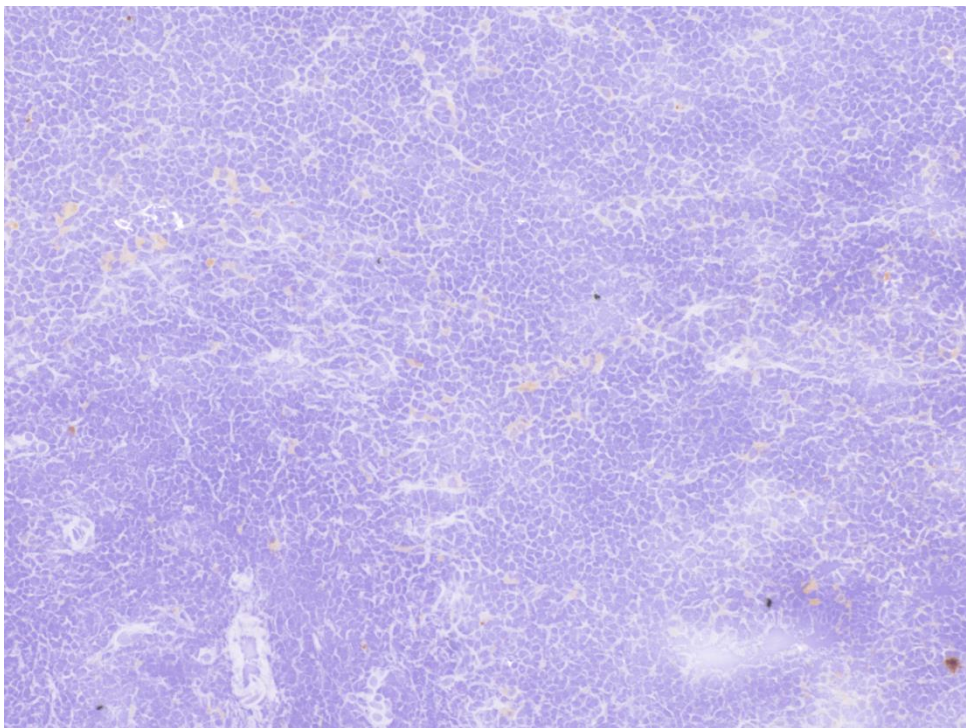

Heart

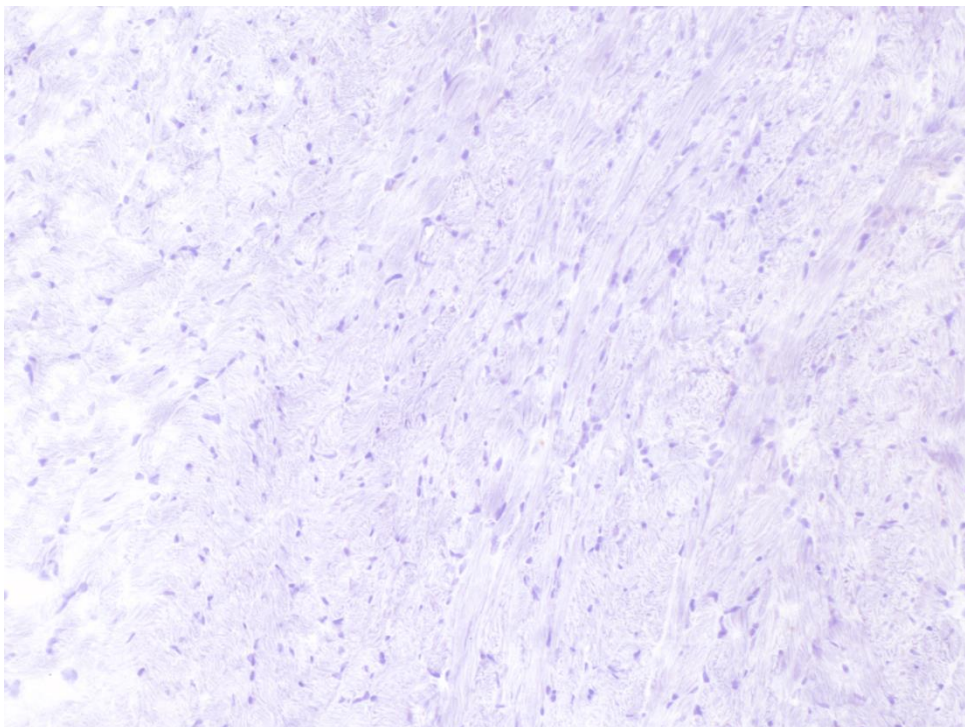

Figure 1B: FAM-CSG homing detected with anti-FITC HRP

Pancreas

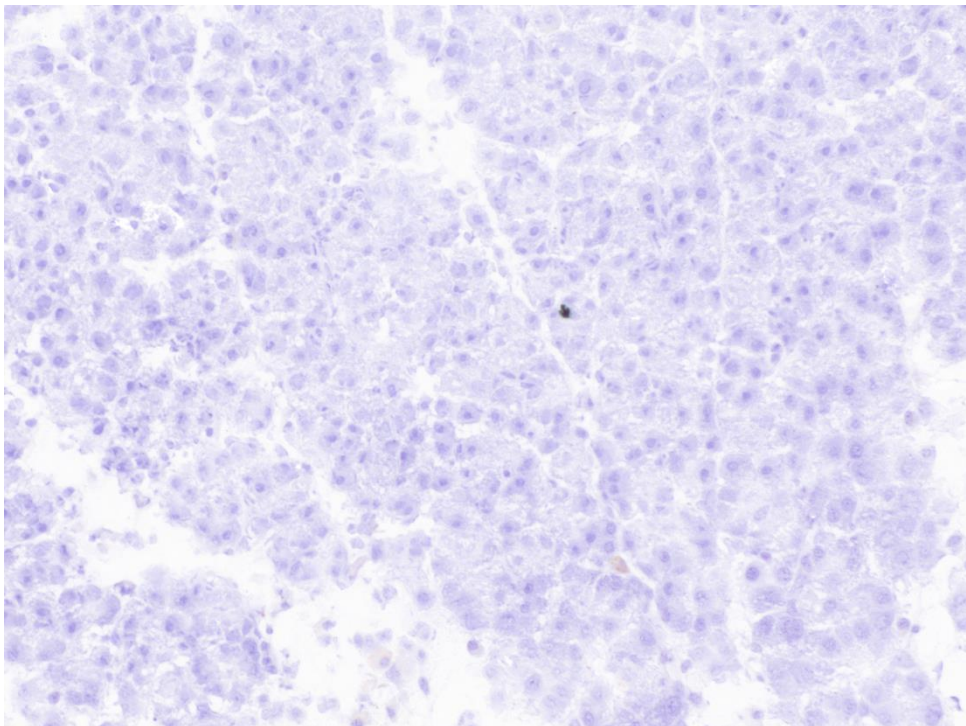

Brain

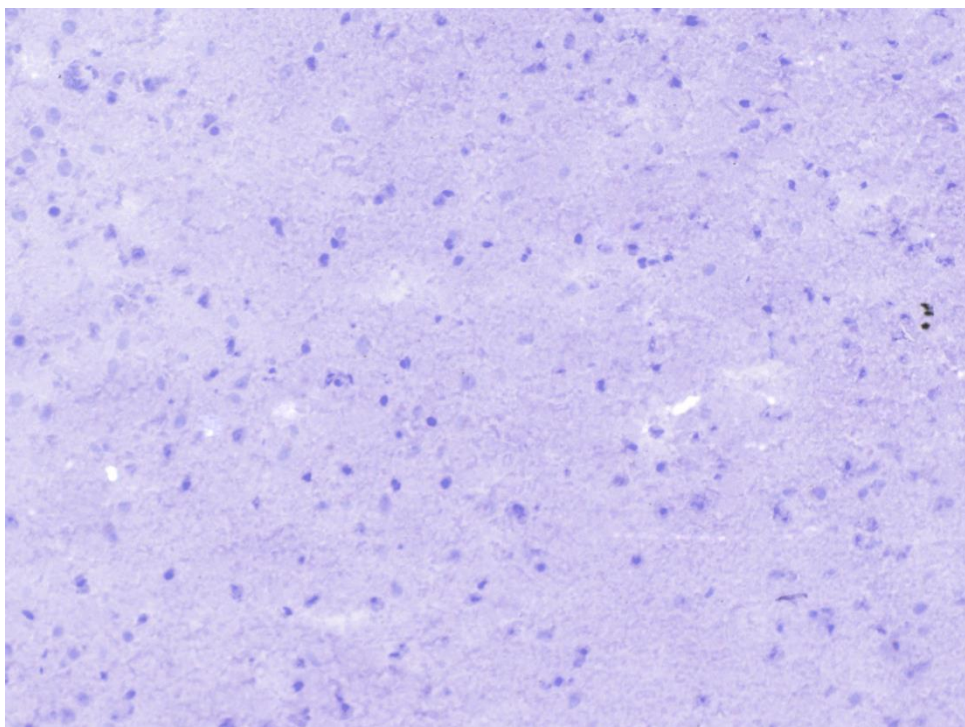

Figure 1B: FAM-CSG homing detected with anti-FITC HRP

Skin

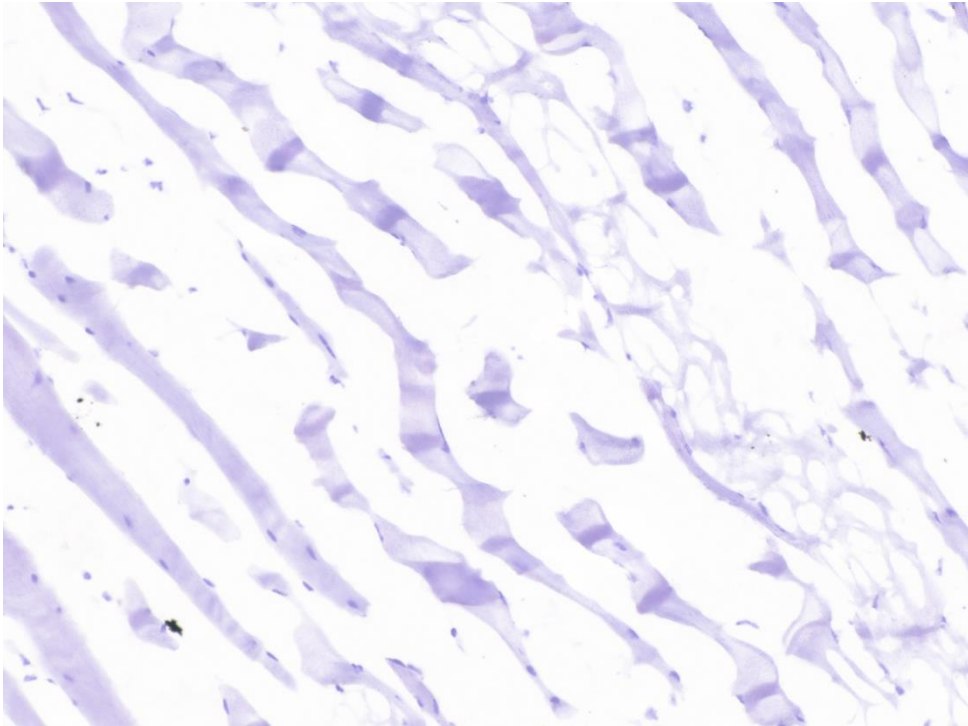

Lymph node

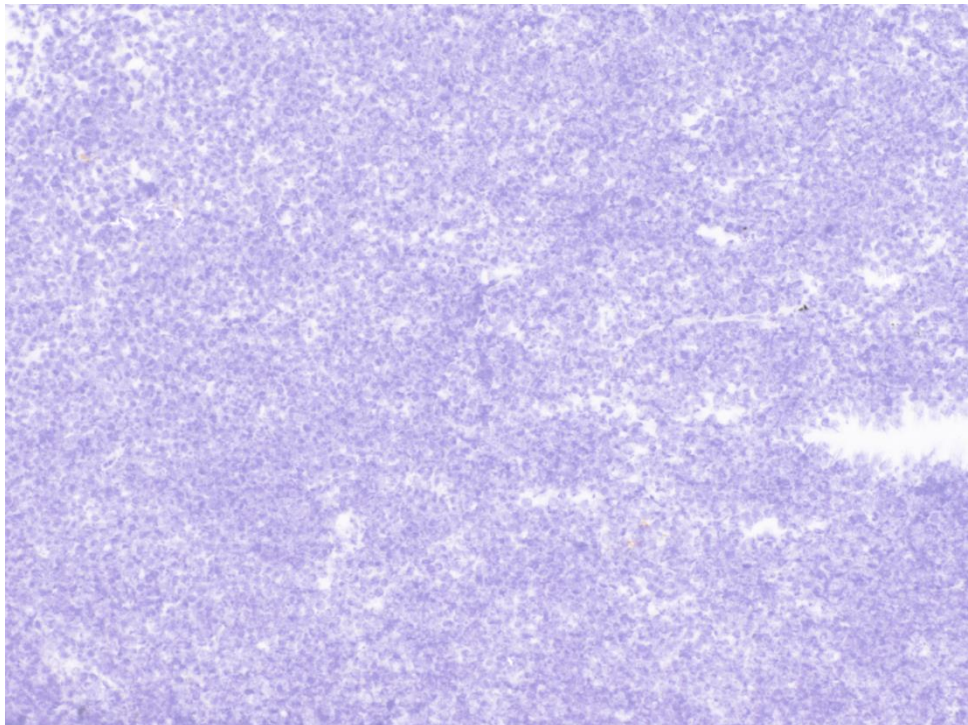

Figure 1D: FAM-CSG homing detected with anti-FITC HRP

Human: normal breast FAM-CSG

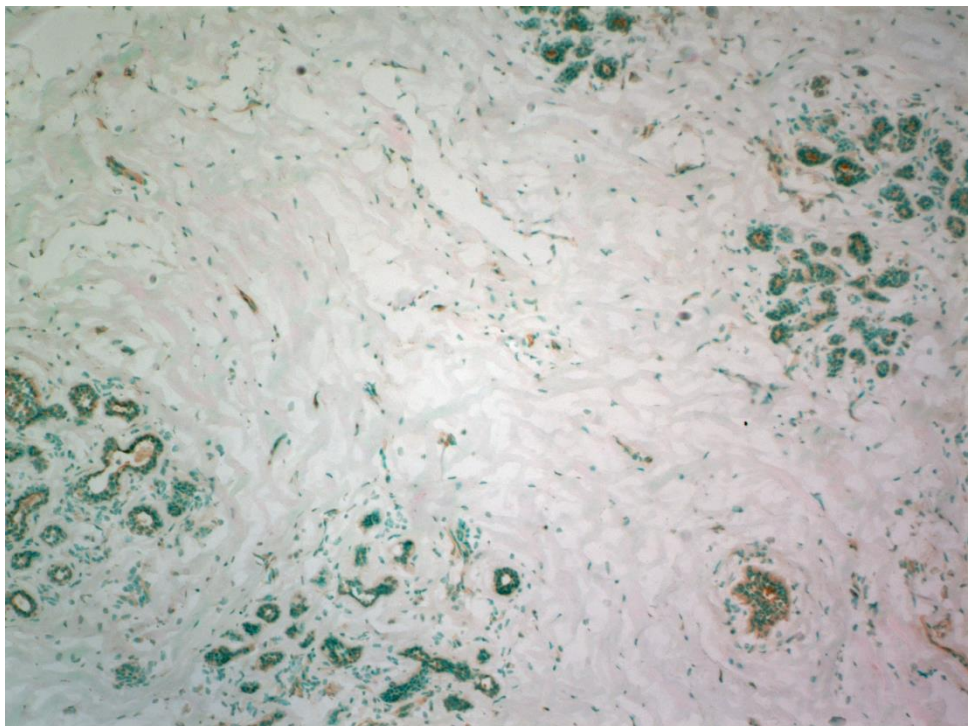

Human: breast tumour FAM-CSG

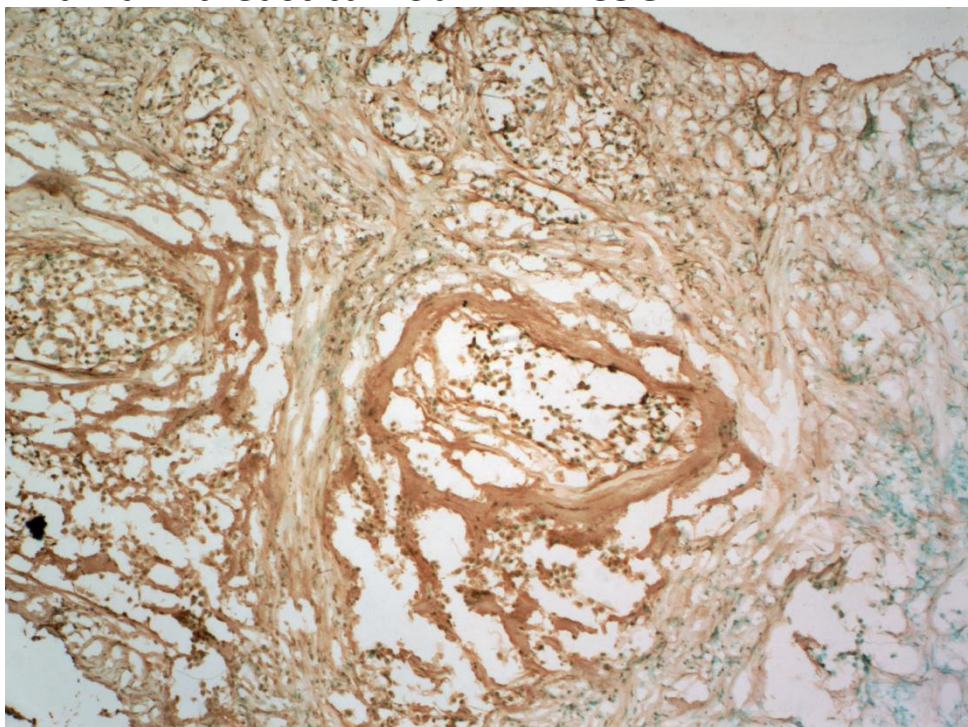

Figure 1D: FAM-CSG homing detected with anti-FITC HRP

Human: breast tumour CSG (excess) + FAM-CSG

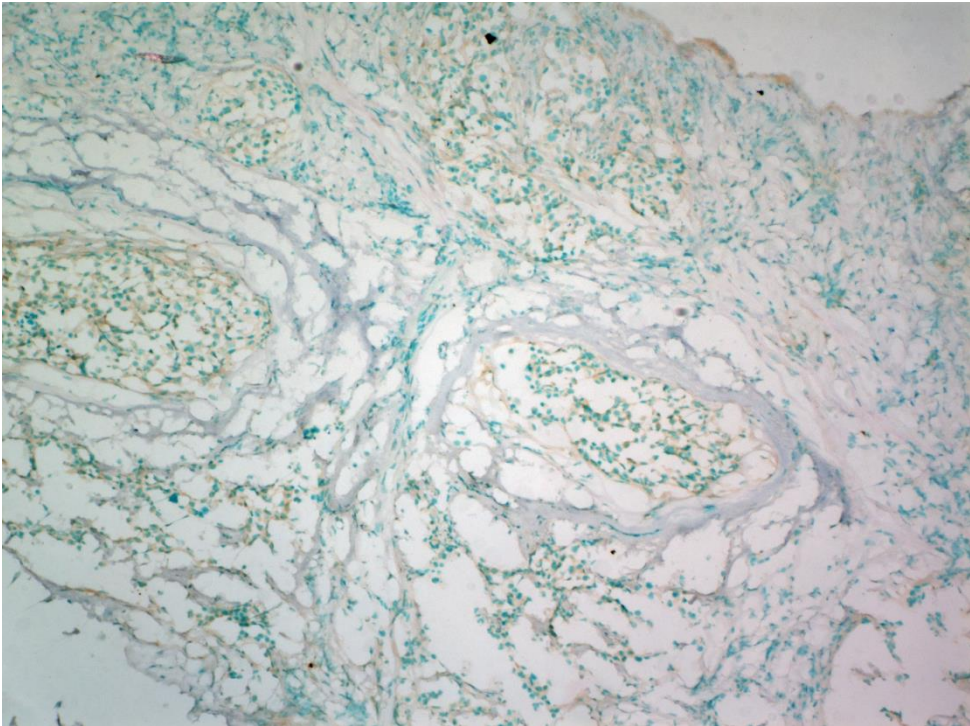

Human: breast tumour FAM-ARA

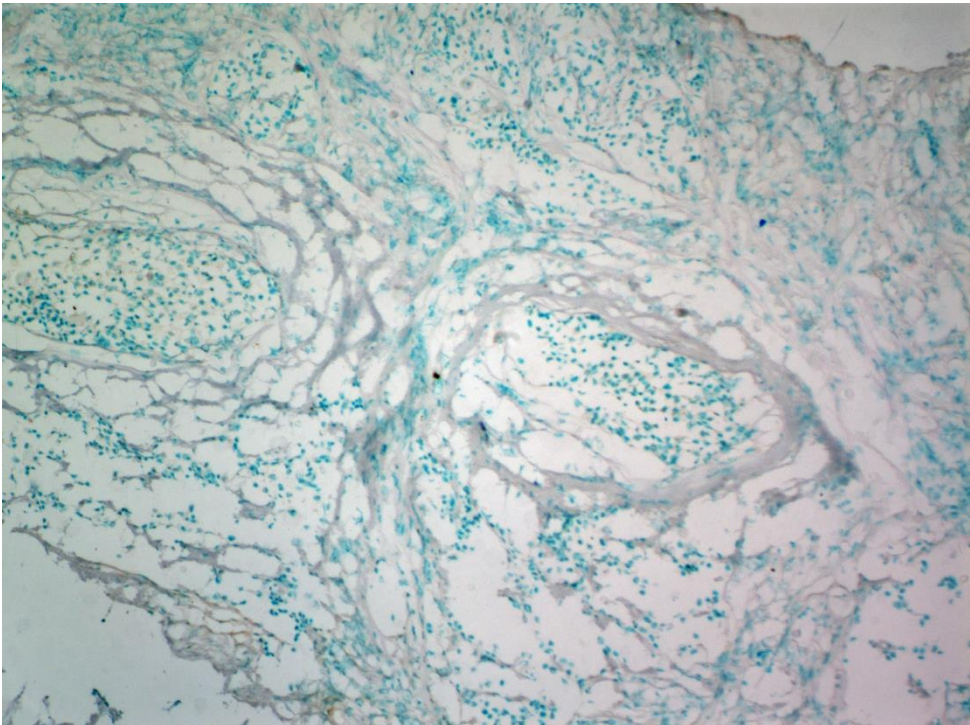



**Figure 1 C** % anti-FITC/field

| 4T1 Tumour | RIP1-Tag5 Tumour | Liver | Intestine | Muscle | Spleen | Heart | Pancreas | Skin | Lymph nodes | Brain |
|------------|------------------|-------|-----------|--------|--------|-------|----------|------|-------------|-------|
| 22.34      | 9.8              | 0.66  | 0.65      | 0.05   | 0.19   | 0.12  | 0        | 0    | 0           | 0     |
| 17.74      | 9.78             | 1.57  | 1.2       | 0      | 0.02   | 0     | 0        | 0    | 0           | 0     |
| 13.39      | 28.93            | 0.33  | 0.77      | 1.4    | 0.09   | 0     | 0        | 0    | 0           | 0     |
| 11.34      | 4.54             |       |           |        |        |       |          |      |             |       |
|            | 9.43             |       |           |        |        |       |          |      |             |       |
|            | 7.33             |       |           |        |        |       |          |      |             |       |
|            | 9.79             |       |           |        |        |       |          |      |             |       |
|            | 15.08            |       |           |        |        |       |          |      |             |       |

**Analysis 1 way ANOVA (Correct for multiple comparisons using Tukey test**

Number of families 1  
 Number of comparisons 55  
 Alpha 0.05

| Tukey's multiple comp  | Mean Diff. | 95.00% CI of diff. | Significan | Summary | Adjusted P Value |
|------------------------|------------|--------------------|------------|---------|------------------|
| 4T1 vs. RIP-Tag        | 4.368      | -4.389 to 13.12    | No         | ns      | 0.801            |
| 4T1 vs. Liver          | 15.35      | 4.428 to 26.27     | Yes        | **      | 0.0015           |
| 4T1 vs. Intestine      | 15.33      | 4.408 to 26.25     | Yes        | **      | 0.0015           |
| 4T1 vs. Muscle         | 15.72      | 4.798 to 26.64     | Yes        | **      | 0.0011           |
| 4T1 vs. Spleen         | 16.1       | 5.181 to 27.02     | Yes        | ***     | 0.0008           |
| 4T1 vs. Heart          | 16.16      | 5.241 to 27.08     | Yes        | ***     | 0.0007           |
| 4T1 vs. Pancreas       | 16.2       | 5.281 to 27.12     | Yes        | ***     | 0.0007           |
| 4T1 vs. Skin           | 16.2       | 5.281 to 27.12     | Yes        | ***     | 0.0007           |
| 4T1 vs. LN             | 16.2       | 5.281 to 27.12     | Yes        | ***     | 0.0007           |
| 4T1 vs. Brain          | 16.2       | 5.281 to 27.12     | Yes        | ***     | 0.0007           |
| RIP-Tag vs. Liver      | 10.98      | 1.301 to 20.66     | Yes        | *       | 0.0165           |
| RIP-Tag vs. Intestine  | 10.96      | 1.281 to 20.64     | Yes        | *       | 0.0168           |
| RIP-Tag vs. Muscle     | 11.35      | 1.671 to 21.03     | Yes        | *       | 0.0119           |
| RIP-Tag vs. Spleen     | 11.74      | 2.054 to 21.42     | Yes        | **      | 0.0084           |
| RIP-Tag vs. Heart      | 11.8       | 2.114 to 21.48     | Yes        | **      | 0.008            |
| RIP-Tag vs. Pancreas   | 11.84      | 2.154 to 21.52     | Yes        | **      | 0.0077           |
| RIP-Tag vs. Skin       | 11.84      | 2.154 to 21.52     | Yes        | **      | 0.0077           |
| RIP-Tag vs. LN         | 11.84      | 2.154 to 21.52     | Yes        | **      | 0.0077           |
| RIP-Tag vs. Brain      | 11.84      | 2.154 to 21.52     | Yes        | **      | 0.0077           |
| Liver vs. Intestine    | -0.02      | -11.7 to 11.66     | No         | ns      | >0.9999          |
| Liver vs. Muscle       | 0.37       | -11.31 to 12.05    | No         | ns      | >0.9999          |
| Liver vs. Spleen       | 0.7533     | -10.92 to 12.43    | No         | ns      | >0.9999          |
| Liver vs. Heart        | 0.8133     | -10.86 to 12.49    | No         | ns      | >0.9999          |
| Liver vs. Pancreas     | 0.8533     | -10.82 to 12.53    | No         | ns      | >0.9999          |
| Liver vs. Skin         | 0.8533     | -10.82 to 12.53    | No         | ns      | >0.9999          |
| Liver vs. LN           | 0.8533     | -10.82 to 12.53    | No         | ns      | >0.9999          |
| Liver vs. Brain        | 0.8533     | -10.82 to 12.53    | No         | ns      | >0.9999          |
| Intestine vs. Muscle   | 0.39       | -11.29 to 12.07    | No         | ns      | >0.9999          |
| Intestine vs. Spleen   | 0.7733     | -10.9 to 12.45     | No         | ns      | >0.9999          |
| Intestine vs. Heart    | 0.8333     | -10.84 to 12.51    | No         | ns      | >0.9999          |
| Intestine vs. Pancreas | 0.8733     | -10.8 to 12.55     | No         | ns      | >0.9999          |
| Intestine vs. Skin     | 0.8733     | -10.8 to 12.55     | No         | ns      | >0.9999          |
| Intestine vs. LN       | 0.8733     | -10.8 to 12.55     | No         | ns      | >0.9999          |
| Intestine vs. Brain    | 0.8733     | -10.8 to 12.55     | No         | ns      | >0.9999          |
| Muscle vs. Spleen      | 0.3833     | -11.29 to 12.06    | No         | ns      | >0.9999          |
| Muscle vs. Heart       | 0.4433     | -11.23 to 12.12    | No         | ns      | >0.9999          |
| Muscle vs. Pancreas    | 0.4833     | -11.19 to 12.16    | No         | ns      | >0.9999          |
| Muscle vs. Skin        | 0.4833     | -11.19 to 12.16    | No         | ns      | >0.9999          |
| Muscle vs. LN          | 0.4833     | -11.19 to 12.16    | No         | ns      | >0.9999          |
| Muscle vs. Brain       | 0.4833     | -11.19 to 12.16    | No         | ns      | >0.9999          |
| Spleen vs. Heart       | 0.06       | -11.62 to 11.74    | No         | ns      | >0.9999          |
| Spleen vs. Pancreas    | 0.1        | -11.58 to 11.78    | No         | ns      | >0.9999          |
| Spleen vs. Skin        | 0.1        | -11.58 to 11.78    | No         | ns      | >0.9999          |
| Spleen vs. LN          | 0.1        | -11.58 to 11.78    | No         | ns      | >0.9999          |
| Spleen vs. Brain       | 0.1        | -11.58 to 11.78    | No         | ns      | >0.9999          |
| Heart vs. Pancreas     | 0.04       | -11.64 to 11.72    | No         | ns      | >0.9999          |
| Heart vs. Skin         | 0.04       | -11.64 to 11.72    | No         | ns      | >0.9999          |
| Heart vs. LN           | 0.04       | -11.64 to 11.72    | No         | ns      | >0.9999          |
| Heart vs. Brain        | 0.04       | -11.64 to 11.72    | No         | ns      | >0.9999          |
| Pancreas vs. Skin      | 0          | -11.68 to 11.68    | No         | ns      | >0.9999          |
| Pancreas vs. LN        | 0          | -11.68 to 11.68    | No         | ns      | >0.9999          |
| Pancreas vs. Brain     | 0          | -11.68 to 11.68    | No         | ns      | >0.9999          |
| Skin vs. LN            | 0          | -11.68 to 11.68    | No         | ns      | >0.9999          |
| Skin vs. Brain         | 0          | -11.68 to 11.68    | No         | ns      | >0.9999          |
| LN vs. Brain           | 0          | -11.68 to 11.68    | No         | ns      | >0.9999          |

**Figure 1 E**

**% anti-FITC/field**

| FAM-CSG on Human Normal Breast | FAM-CSG on Human Breast Tumour | CSG (excess) + FAM-CSG on Human Breast tumour | FAM-ARA on Human Breast Tumour |
|--------------------------------|--------------------------------|-----------------------------------------------|--------------------------------|
| 5.3                            | 29.1                           | 0.1                                           | 0.6                            |
| 2.8                            | 13.1                           | 7.1                                           | 2.9                            |
| 6.1                            | 34.2                           | 0.1                                           | 1.4                            |
|                                | 40.5                           | 0.1                                           | 0.1                            |
|                                | 32.2                           | 0.4                                           | 0.1                            |
|                                | 41.4                           | 0.6                                           | 0.3                            |
|                                | 10.7                           |                                               | 0.4                            |

**Analysis 1 way ANOVA (Correct for multiple comparisons using Tukey test)**

|                                  |      |
|----------------------------------|------|
| Number of families               | 1    |
| Number of comparisons per family | 6    |
| Alpha                            | 0.05 |

| Tukey's multiple comparisons test             | Mean Diff. | 95.00% CI of diff. | Significant? | Summary | Adjusted P Value |
|-----------------------------------------------|------------|--------------------|--------------|---------|------------------|
| Normal Breast FAM-CSG vs. Tumor FAM-CSG       | -24.01     | -37.82 to -10.2    | Yes          | ***     | 0.0005           |
| Normal Breast FAM-CSG vs. Tumor CSG + FAM-CSG | 3.333      | -10.81 to 17.48    | No           | ns      | 0.9098           |
| Normal Breast FAM-CSG vs. Tumor FAM-ARA       | 3.905      | -9.901 to 17.71    | No           | ns      | 0.8557           |
| Tumor FAM-CSG vs. Tumor CSG + FAM-CSG         | 27.34      | 16.21 to 38.47     | Yes          | ****    | <0.0001          |
| Tumor FAM-CSG vs. Tumor FAM-ARA               | 27.91      | 17.22 to 38.61     | Yes          | ****    | <0.0001          |
| Tumor CSG + FAM-CSG vs. Tumor FAM-ARA         | 0.5714     | -10.56 to 11.7     | No           | ns      | 0.9989           |
