# Supplementary material for: Immune‐mediated ECM depletion improves tumour perfusion and payload delivery
Source: PubMed Central journal article supplement (PMC6895610; doi:10.15252/emmm.201910923), 2019-11-11
Supplement: EMMM-11-e10923-s004.pdf [file EMMM-11-e10923-s004.pdf]

## Figure 2 B: Co-staining analysis

C3H Pancreas: collagen IV/Nidogen I/DAPI

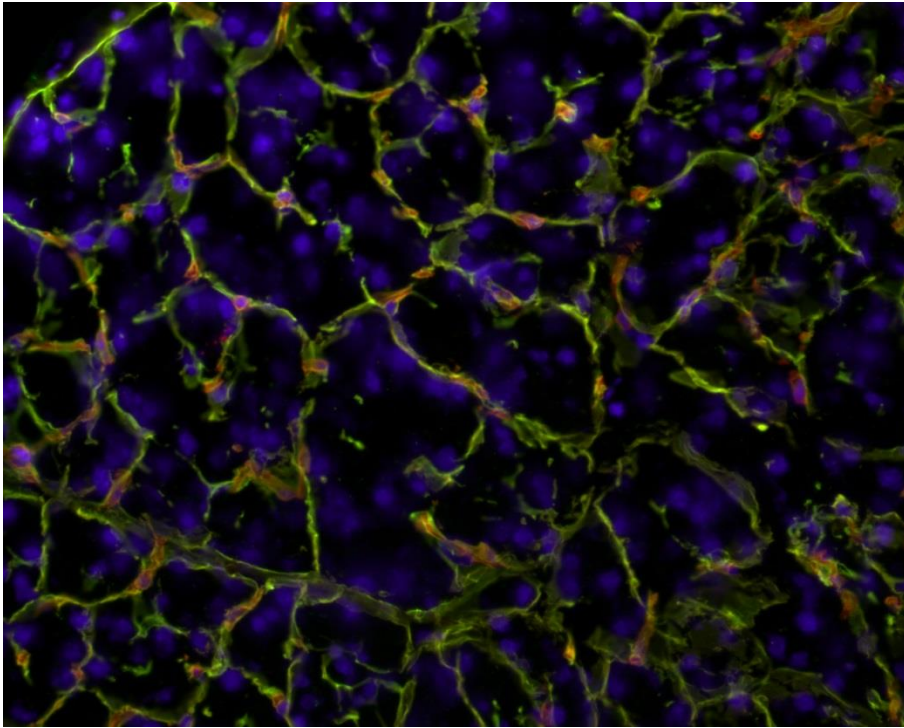

C3H Pancreas: Laminin/Nidogen I/DAPI

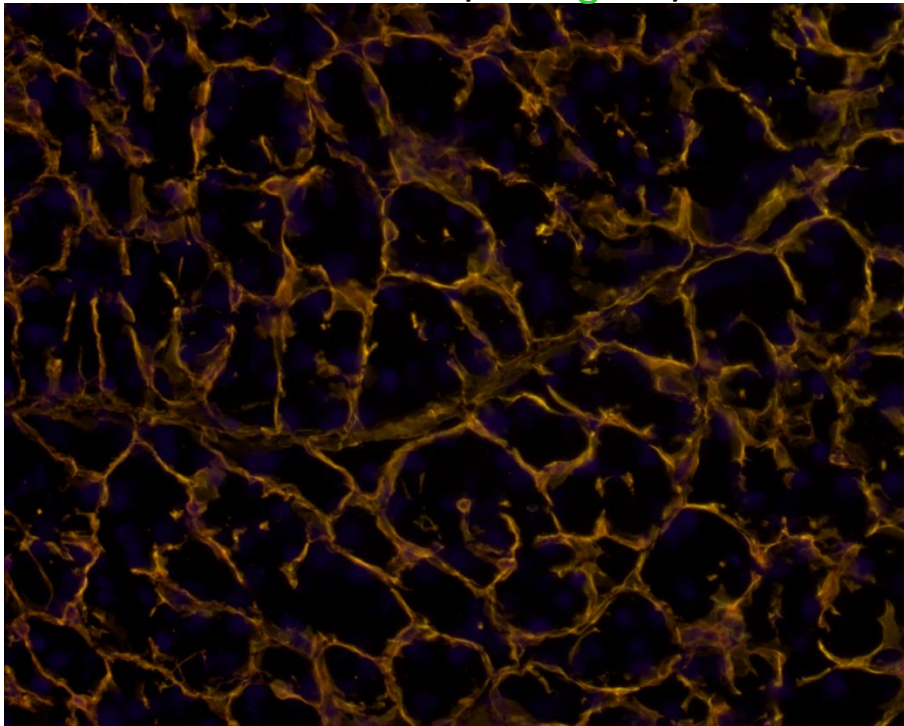

Figure 2 B: Co-staining analysis

RIP1-Tag5 tumour: collagen IV/Nidogen I/DAPI

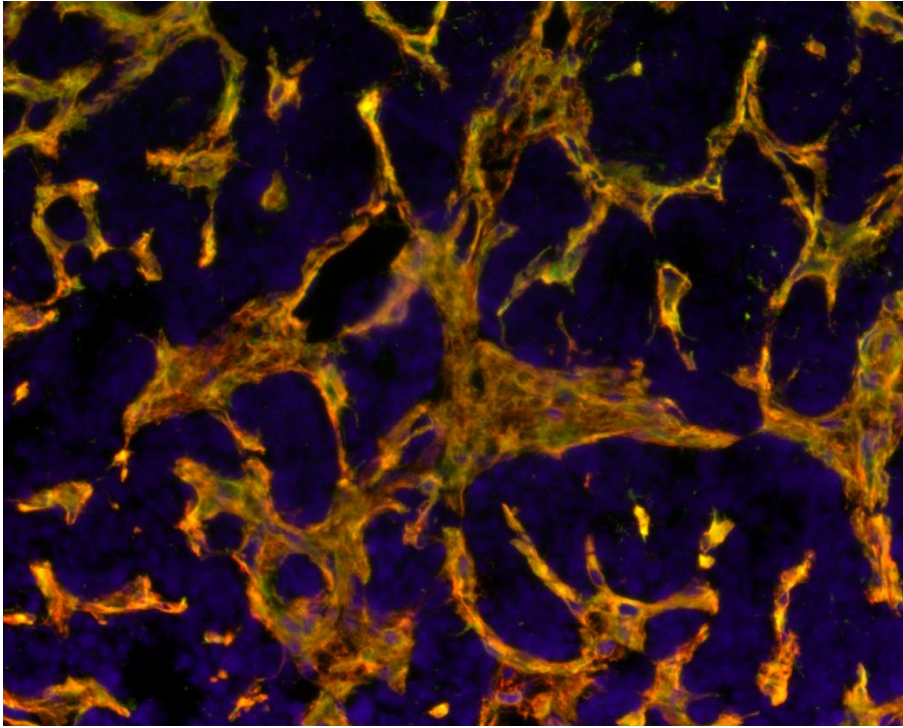

RIP1-Tag5 tumour: Laminin/Nidogen I/DAPI

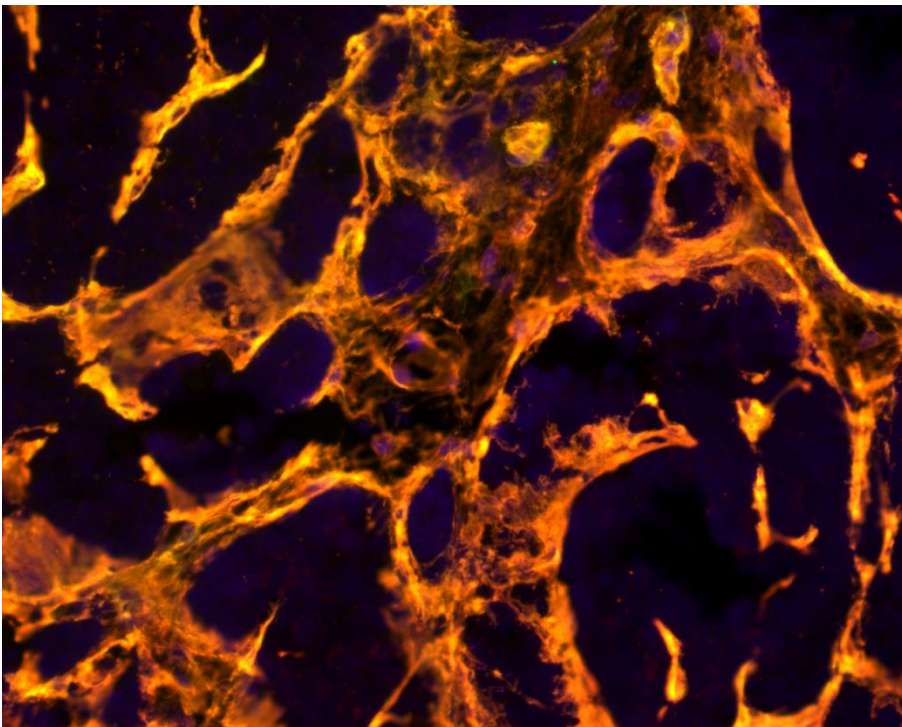

Figure 2 C: Co-staining analysis

C3H Panreas: **CD31**/**Laminin**/**DAPI**

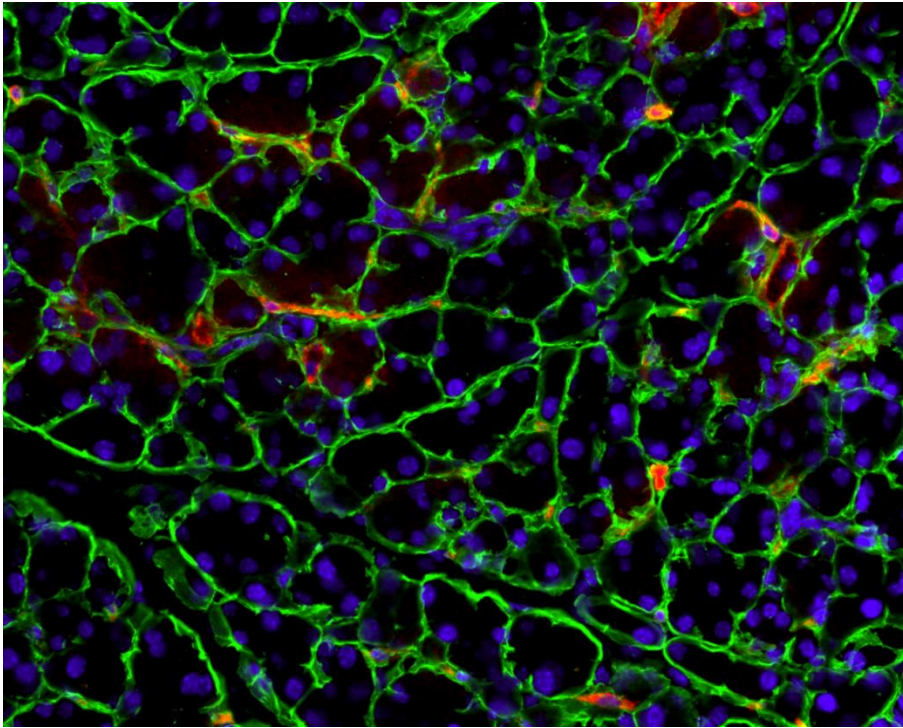

RIP1-Tag5 tumour: **CD31**/**Laminin**/**DAPI**

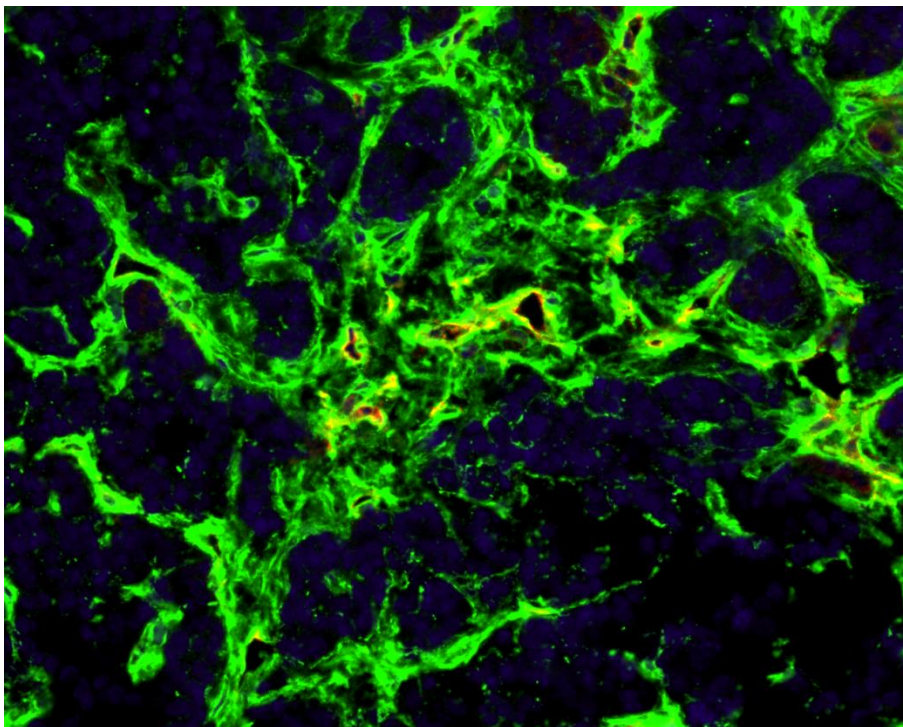

Figure 2 D: Co-staining analysis

RIP1-Tag5 tumour: FAM-CSG/Laminin/DAPI

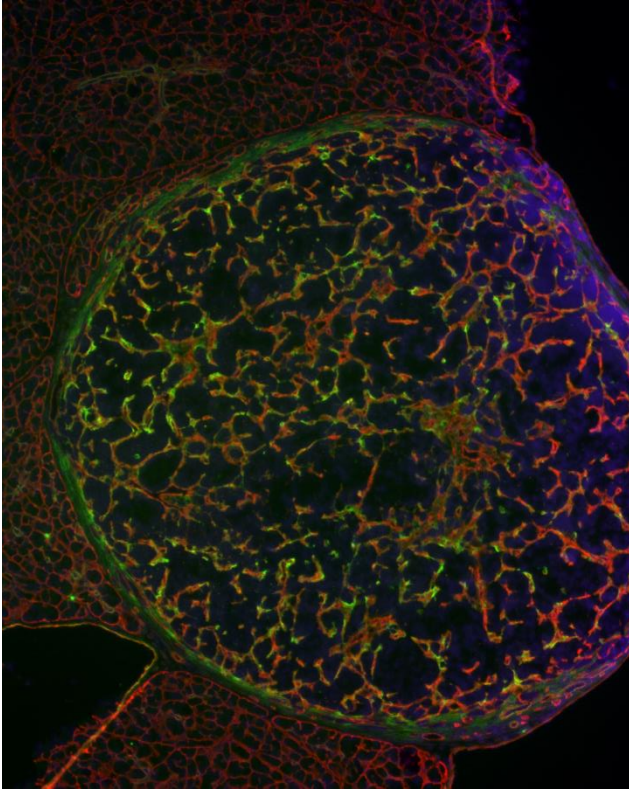

RIP1-Tag5 tumour: Laminin/CD31/DAPI

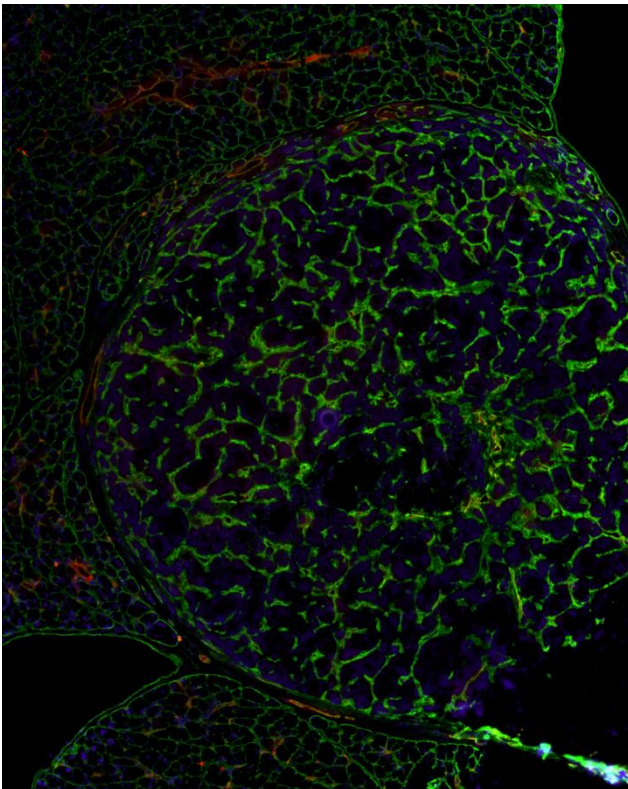

Figure 2 E: Co-staining analysis

RIP1-Tag5 tumour: FAM-CSG/Laminin

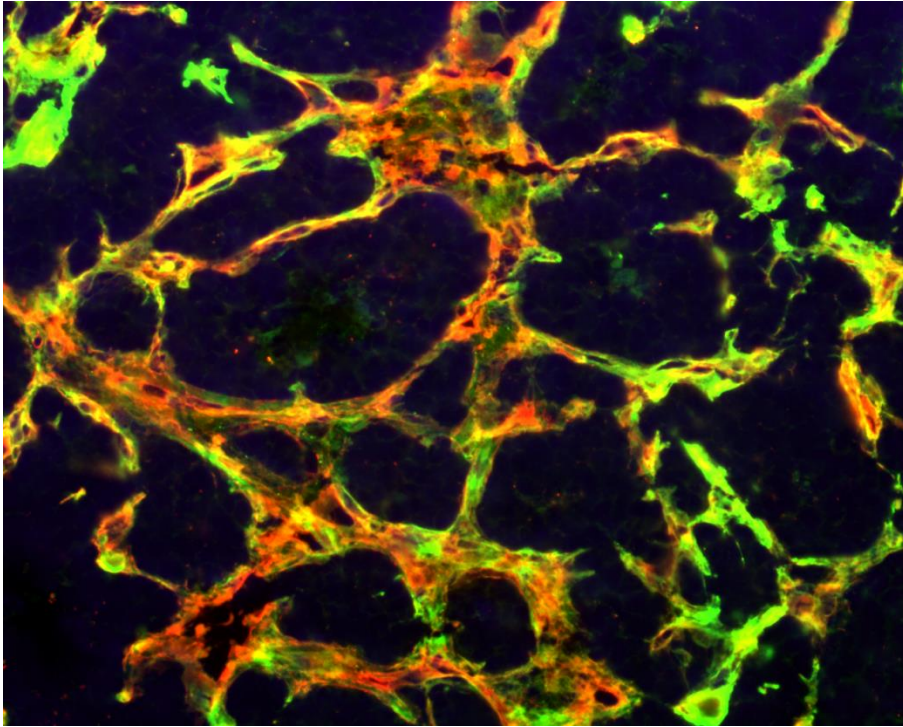

RIP1-Tag5 tumour: FAM-CSG/Nidogen-1

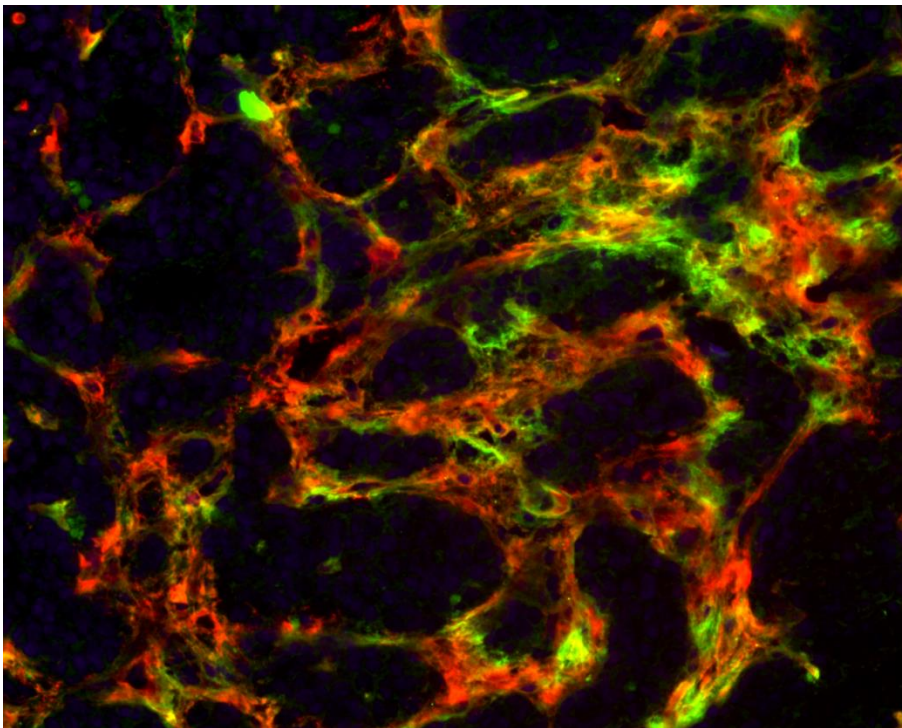

## Figure 2 E: Co-staining analysis

RIP1-Tag5 tumour: FAM-CSG/Col-IV

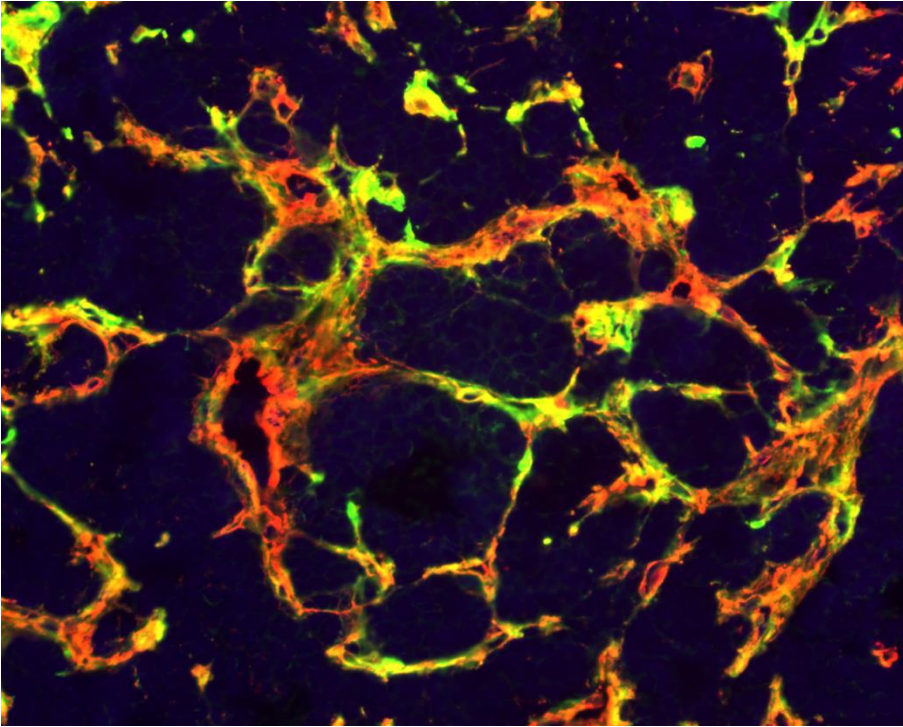

RIP1-Tag5 tumour: FAM-CSG/CD31/DAPI

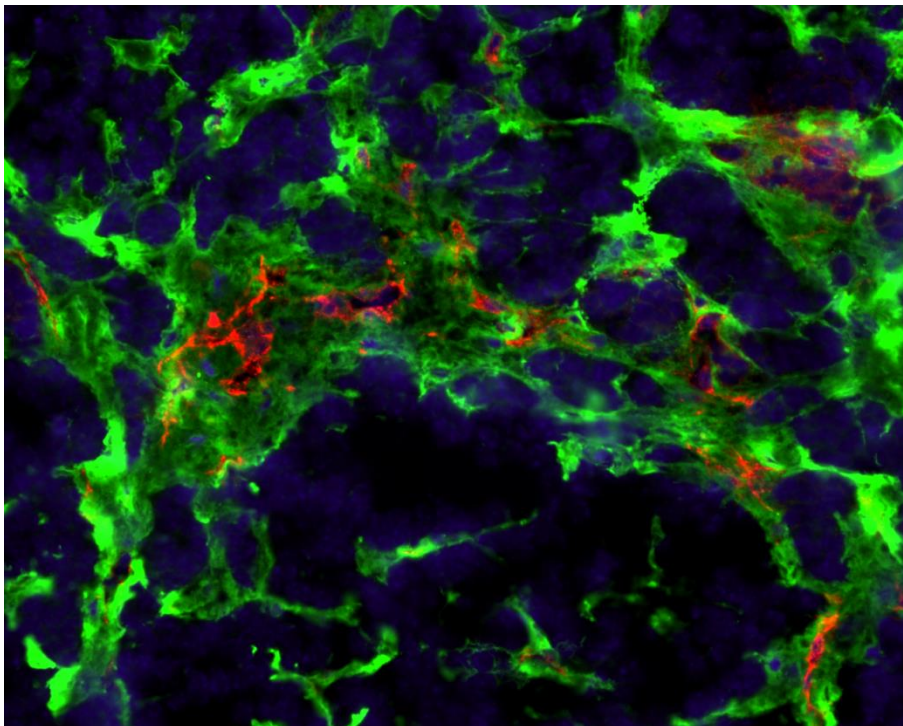

Figure 2 E: Co-staining analysis

RIP1-Tag5 tumour: FAM-CREKA/CD31/DAPI

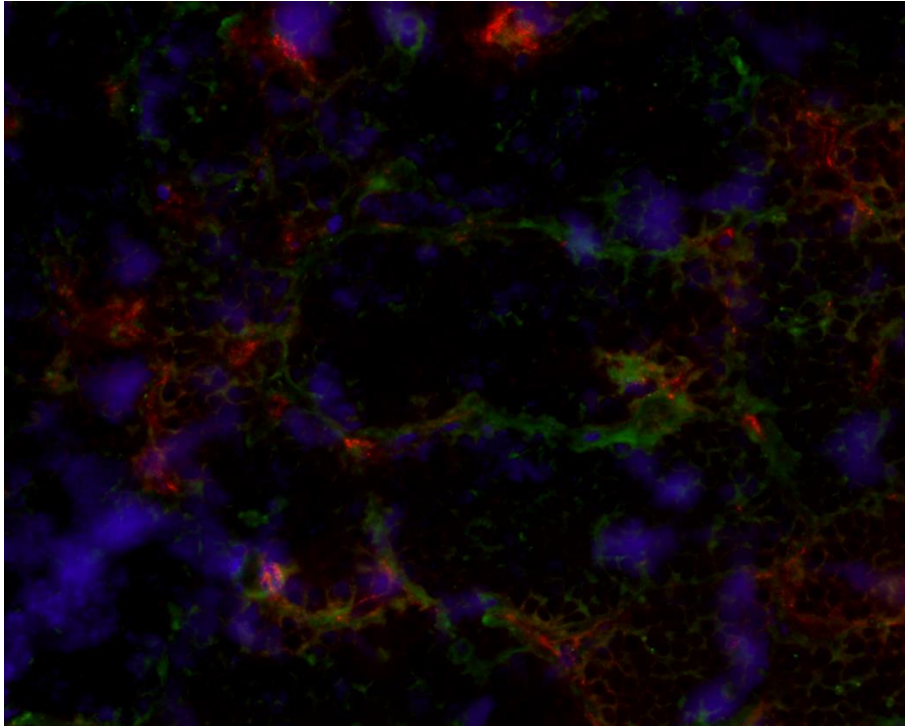

RIP1-Tag5 tumour: FAM-CREKA/Laminin/DAPI

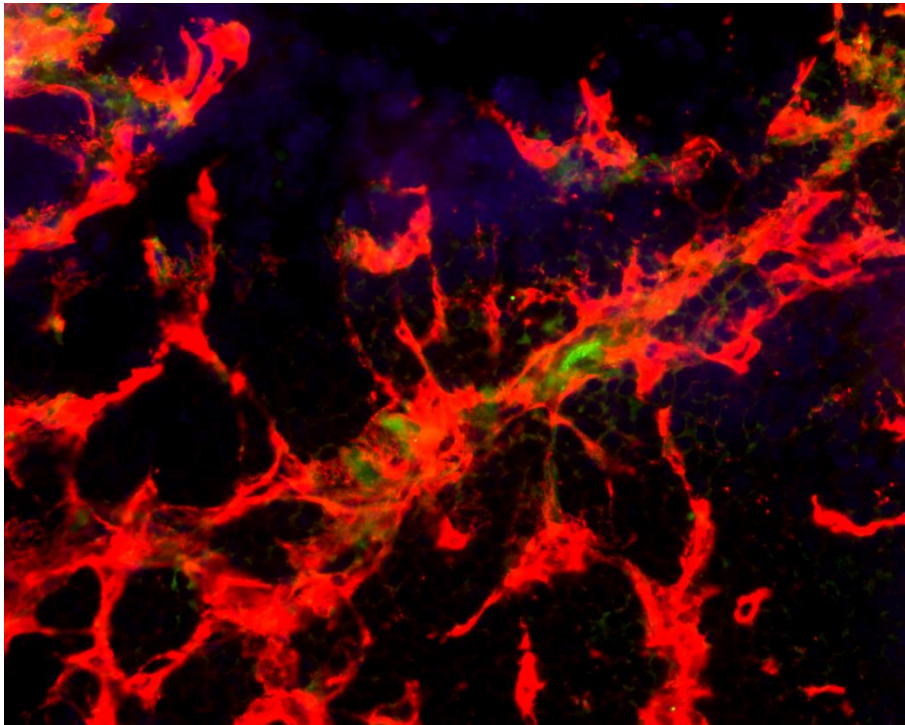

**Figure 2B** % staining/field

| FAM-CSG on Human Normal Breast | Pancreas | Pancreas | Pancreas | Tumour | Tumour | Tumour |
|--------------------------------|----------|----------|----------|--------|--------|--------|
| Laminin                        | 18.6     | 12.6     | 10       | 25.4   | 27.9   | 40.3   |
| Nidogen 1                      | 11.4     | 14.8     | 10.4     | 27.3   | 27.9   | 35.1   |
| Collagen IV                    | 9.74     | 10.46    | 9.78     | 30.7   | 39.8   | 38.4   |

| Multiple t-tests | Significant? | P value     | Mean1 | Mean2 | Difference | of differer | t ratio | df |
|------------------|--------------|-------------|-------|-------|------------|-------------|---------|----|
| Laminin          | Yes          | 0.029426579 | 13.73 | 31.2  | -17.47     | 5.264       | 3.318   | 4  |
| Nidogen 1        | Yes          | 0.003230055 | 12.2  | 30.1  | -17.9      | 2.838       | 6.308   | 4  |
| Collagen IV      | Yes          | 0.000753965 | 9.993 | 36.3  | -26.31     | 2.839       | 9.267   | 4  |

**Figure 2C: Ratio Laminin: CD31**

| Pancreas | Tumour |
|----------|--------|
| 7.54     | 20.36  |
| 6.86     | 8.66   |
| 7.86     | 14.95  |
| 2.02     | 12.42  |
| 5.53     | 17.55  |

**Unpaired t-test**

| Table Analyzed                      | Ratio Laminin CD31 |
|-------------------------------------|--------------------|
| Column B                            | RT5 T              |
| vs.                                 | vs.                |
| Column A                            | Pancreas           |
| Unpaired t test                     |                    |
| P value                             | 0.0048             |
| P value summary                     | **                 |
| Significantly different (P < 0.05)? | Yes                |
| One- or two-tailed P value?         | Two-tailed         |
| t, df                               | t=3.861 df=8       |

**Figure 2E: % of colocalisation between 2 markers**

| CSG Lam | CSG NID1 | CSG COLIV | CSG CD31 | CREKA Lam | CREKA CD31 |
|---------|----------|-----------|----------|-----------|------------|
| 98.7    | 78.8     | 86        | 25.7     | 4.87      | 10.74      |
| 81.9    | 92.7     | 79.8      | 22.8     | 3.32      | 5.44       |
| 85.5    | 93.3     | 61.7      | 21.3     | 10.7      | 24.1       |
| 91.4    | 86.1     | 77.4      | 27.3     | 5.6       | 8.86       |

**One-way ANOVA Multiple comparison**

|                                  |      |
|----------------------------------|------|
| Number of families               | 1    |
| Number of comparisons per family | 6    |
| Alpha                            | 0.05 |

| Tukey's multiple comparisons test | Mean Diff. | 95.00% CI of diff. | Significant? | Summary | Adjusted P Value |
|-----------------------------------|------------|--------------------|--------------|---------|------------------|
| CSG Lam vs. CSG CD31+             | 65.1       | 52.75 to 77.45     | Yes          | ****    | <0.0001 A-D      |
| CSG Lam vs. CREKA Lam             | 83.25      | 70.9 to 95.6       | Yes          | ****    | <0.0001 A-E      |
| CSG Lam vs. CREKA CD31            | 77.09      | 64.74 to 89.44     | Yes          | ****    | <0.0001 A-F      |
| CSG CD31 vs. CREKA Lam            | 18.15      | 5.801 to 30.5      | Yes          | **      | 0.0044 D-E       |
| CSG CD31 vs. CREKA CD31           | 11.99      | -0.3612 to 24.34   | No           | ns      | 0.0581 D-F       |
| CREKA Lam vs. CREKA CD31          | -6.163     | -18.51 to 6.189    | No           | ns      | 0.4773 E-F       |
