# Supplementary material for: Immune‐mediated ECM depletion improves tumour perfusion and payload delivery
Source: PubMed Central journal article supplement (PMC6895610; doi:10.15252/emmm.201910923), 2019-11-11
Supplement: EMMM-11-e10923-s005.pdf [file EMMM-11-e10923-s005.pdf]

Figure 3A: % CD4/tumour area

| Untreated | CSG  | TNF -CSG 2 ug | TNF-CSG 5 ug |
|-----------|------|---------------|--------------|
| 0.54      | 0.79 | 4.76          | 10.23        |
| 3.76      | 0.63 | 3.56          | 4.3          |
| 3.71      | 1.38 | 6.3           | 5.09         |
| 0.48      | 3.73 | 5.93          | 7            |
| 5.6       | 4.36 | 5.43          | 5.14         |
|           | 3.14 | 5.7           | 9            |
|           | 4.05 |               |              |

One-way ANOVA multiple comparison

Number of families 1  
 Number of comparisons per family 6  
 Alpha 0.05

| Tukey's multiple comparisons test | Mean Diff. | 95.00% CI of dif | Significant? | Summary | Adjusted P Value |
|-----------------------------------|------------|------------------|--------------|---------|------------------|
| Untreated vs. CSG                 | 0.264      | -2.381 to 2.909  | No           | ns      | 0.9923           |
| Untreated vs. TNF -CSG 2 ug       | -3.433     | -6.078 to -0.788 | Yes          | **      | 0.0079           |
| Untreated vs. TNF-CSG 5 ug        | -3.888     | -6.633 to -1.144 | Yes          | **      | 0.0037           |
| CSG vs. TNF -CSG 2 ug             | -3.697     | -6.238 to -1.156 | Yes          | **      | 0.0029           |
| CSG vs. TNF-CSG 5 ug              | -4.152     | -6.797 to -1.508 | Yes          | **      | 0.0013           |
| TNF -CSG 2 ug vs. TNF-CSG 5 ug    | -0.4552    | -3.1 to 2.19     | No           | ns      | 0.9632           |

% CD8/tumour area

| Untreated | CSG  | TNF -CSG 2 ug | TNF-CSG 5 ug |
|-----------|------|---------------|--------------|
| 1.09      | 0.6  | 6             | 4.36         |
| 0.72      | 0.35 | 2.32          | 4.34         |
| 0.49      | 0.2  | 2.57          | 2.53         |
| 0.3       | 0.26 | 3.5           | 7.71         |
| 2.1       | 1.02 | 1.51          | 2.24         |
| 0.33      | 1.04 | 8.1           | 7.18         |
|           | 0.55 | 5.9           |              |

| Tukey's multiple comparisons test | Mean Diff. | 95.00% CI of dif | Significant? | Summary | Adjusted P Value |
|-----------------------------------|------------|------------------|--------------|---------|------------------|
| Untreated vs. CSG                 | 0.264      | -2.381 to 2.909  | No           | ns      | 0.9923           |
| Untreated vs. TNF -CSG 2 ug       | -3.433     | -6.078 to -0.788 | Yes          | **      | 0.0079           |
| Untreated vs. TNF-CSG 5 ug        | -3.888     | -6.633 to -1.144 | Yes          | **      | 0.0037           |
| CSG vs. TNF -CSG 2 ug             | -3.697     | -6.238 to -1.156 | Yes          | **      | 0.0029           |
| CSG vs. TNF-CSG 5 ug              | -4.152     | -6.797 to -1.508 | Yes          | **      | 0.0013           |
| TNF -CSG 2 ug vs. TNF-CSG 5 ug    | -0.4552    | -3.1 to 2.19     | No           | ns      | 0.9632           |

% CD11b/tumour area

| Untreated | CSG  | TNF -CSG 2 ug | TNF-CSG 5 ug |
|-----------|------|---------------|--------------|
| 0.77      | 0.51 | 2.17          | 4.2          |
| 0.61      | 0.3  | 3.16          | 3.8          |
| 0.38      | 0.5  | 1.85          | 3.71         |
| 1.1       | 0.25 | 1.56          | 4.47         |
| 0.3       | 0.17 |               | 3.63         |
|           |      |               | 3.38         |

| Tukey's multiple comparisons test | Mean Diff. | 95.00% CI of dif | Significant? | Summary | Adjusted P Value |
|-----------------------------------|------------|------------------|--------------|---------|------------------|
| Untreated vs. CSG                 | 0.286      | -0.465 to 1.037  | No           | ns      | 0.7006           |
| Untreated vs. TNF -CSG 2 ug       | -1.553     | -2.35 to -0.7565 | Yes          | ***     | 0.0002           |
| Untreated vs. TNF-CSG 5 ug        | -3.233     | -3.952 to -2.514 | Yes          | ****    | <0.0001          |
| CSG vs. TNF -CSG 2 ug             | -1.839     | -2.636 to -1.042 | Yes          | ****    | <0.0001          |
| CSG vs. TNF-CSG 5 ug              | -3.519     | -4.238 to -2.8   | Yes          | ****    | <0.0001          |
| TNF -CSG 2 ug vs. TNF-CSG 5 ug    | -1.68      | -2.446 to -0.913 | Yes          | ****    | <0.0001          |

Figure 3B: cDNA/HPRT

| CSG      | TNF-CSG 2 ug | TNF-CSG 10 ug |
|----------|--------------|---------------|
| 0.0357   | 0.1734       | 0.302         |
| 0.040561 | 0.013099     | 0.382906      |
| 0.071684 | 0.068004     | 0.541311      |
| 0.070408 | 0.184504     | 1.698575      |
| 0.136735 | 0.28874      | 1.814815      |
| 0.079847 | 0.248885     | 1.376068      |
| 0.8196   | 3.5697       | 3.4986        |
| 0.7255   | 1.369        | 3.8917        |
| 0.8301   | 1.6814       | 1.3675        |
| 0.4125   | 0.7834       | 0.4085        |
| 0.1952   | 1.8935       | 0.657         |
| 0.0992   | 0.4384       | 0.2553        |
| 0.2278   | 0.9418       | 0.6661        |
| 0.7676   | 1.6686       | 0.9618        |

Statistical significance determined without correction for multiple comparisons, with alpha=0.05%.

Each row was analyzed individually, without assuming a consistent SD.

| CSG vs TNF-CSG 10 ug | Significant? | P value     | Mean1   | Mean2  | Difference | of differer | t ratio | df |
|----------------------|--------------|-------------|---------|--------|------------|-------------|---------|----|
| uPA                  | Yes          | 0.001800467 | 0.09025 | 0.2731 | -0.1828    | 0.03438     | 5.317   | 6  |
| MMP2                 | Yes          | 0.003257315 | 0.09917 | 0.3745 | -0.2753    | 0.05833     | 4.72    | 6  |
| MMP3                 | Yes          | 0.001067796 | 0.1021  | 0.4371 | -0.335     | 0.05692     | 5.885   | 6  |
| MMP9                 | Yes          | 0.000196158 | 0.08666 | 1.736  | -1.65      | 0.2049      | 8.053   | 6  |
| MMP12                | Yes          | 0.043139863 | 0.2059  | 0.9785 | -0.7726    | 0.3023      | 2.556   | 6  |
| MMP14                | Yes          | 0.004831219 | 0.2262  | 1.833  | -1.607     | 0.3695      | 4.348   | 6  |
| Cathepsin B          | No           | 0.186782517 | 2.651   | 4.133  | -1.482     | 0.9948      | 1.49    | 6  |
| Cathepsin L          | Yes          | 0.006950071 | 1.378   | 3.046  | -1.667     | 0.4146      | 4.021   | 6  |
| Cathepsin S          | No           | 0.080022985 | 1.168   | 1.582  | -0.4143    | 0.1969      | 2.104   | 6  |
| Cathepsin C          | No           | 0.614190003 | 0.5943  | 0.5296 | 0.06465    | 0.1216      | 0.5315  | 6  |
| ADAM8                | No           | 0.423719439 | 0.54    | 0.7404 | -0.2004    | 0.2335      | 0.8582  | 6  |

|         |     |             |        |        |         |        |       |   |
|---------|-----|-------------|--------|--------|---------|--------|-------|---|
| ADAM9   | Yes | 0.020345398 | 0.1637 | 0.342  | -0.1784 | 0.057  | 3.129 | 6 |
| ADAM10  | No  | 0.133558977 | 0.4635 | 0.7963 | -0.3328 | 0.1919 | 1.734 | 6 |
| ADAM17b | No  | 0.528352303 | 1.232  | 0.9914 | 0.2409  | 0.3601 | 0.669 | 6 |

  

| CSG vs TNF-CSG 2 ug | Significant? | P value     | Mean1   | Mean2   | Difference | of differer | t ratio | df |
|---------------------|--------------|-------------|---------|---------|------------|-------------|---------|----|
| uPA                 | Yes          | 0.02020653  | 0.09025 | 0.1922  | -0.1019    | 0.03408     | 2.991   | 7  |
| MMP2                | Yes          | 0.046849921 | 0.09917 | 0.02558 | 0.07359    | 0.03055     | 2.409   | 7  |
| MMP3                | No           | 0.97160073  | 0.1021  | 0.1008  | 0.00133    | 0.03606     | 0.03689 | 7  |
| MMP9                | Yes          | 0.009010511 | 0.08666 | 0.1904  | -0.1037    | 0.02899     | 3.577   | 7  |
| MMP12               | No           | 0.186729314 | 0.2059  | 0.2725  | -0.06658   | 0.04549     | 1.464   | 7  |
| MMP14               | No           | 0.216158683 | 0.2262  | 0.3848  | -0.1586    | 0.1166      | 1.359   | 7  |
| Cathepsin B         | Yes          | 0.017104694 | 2.651   | 6.134   | -3.483     | 1.12        | 3.109   | 7  |
| Cathepsin L         | No           | 0.11649472  | 1.378   | 2.325   | -0.9464    | 0.5286      | 1.79    | 7  |
| Cathepsin S         | Yes          | 0.009159117 | 1.168   | 2.225   | -1.057     | 0.2965      | 3.565   | 7  |
| Cathepsin C         | No           | 0.102827108 | 0.5943  | 0.8048  | -0.2105    | 0.1122      | 1.876   | 7  |
| ADAM8               | Yes          | 0.015047232 | 0.54    | 1.356   | -0.8158    | 0.2549      | 3.201   | 7  |
| ADAM9               | Yes          | 0.009193964 | 0.1637  | 0.3355  | -0.1718    | 0.04824     | 3.562   | 7  |
| ADAM10              | Yes          | 0.023466772 | 0.4635  | 0.8821  | -0.4186    | 0.1451      | 2.885   | 7  |
| ADAM17b             | Yes          | 0.047213101 | 1.232   | 1.961   | -0.7285    | 0.3031      | 2.404   | 7  |

Figure 3C: Protease ELISA assay

|                    | PBS 20hr | CSG 4hr | CSG 20hr | TNF-CSG 4hr | TNF-CSG 20hr |
|--------------------|----------|---------|----------|-------------|--------------|
| CD4: MMP9          | 1104     | 1164    | 1194     | 1254        | 1734         |
|                    | 1014     | 884     | 1144     | 1154        | 1724         |
|                    | 1144     | 1044    | 1194     | 1364        | 1534         |
|                    | 1154     | 974     | 1334     | 1334        | 2064         |
| CD4: MMP12         | 860.3    | 1254.6  | 1114.6   | 914.6       | 1606         |
|                    | 923.1    | 1217.4  | 983.1    | 1077.4      | 1614.6       |
|                    | 946      | 860.3   | 1123.1   | 951.7       | 1620.3       |
|                    | 1174.6   | 988.9   | 1094.6   | 1146        | 1691.7       |
| CD4: Cathepsin L   | 0        | 185.9   | 0        | 0           | 0            |
|                    | 0        | 91.8    | 0        | 91.8        | 88.8         |
|                    | 0        | 0       | 30       | 0           | 203.5        |
|                    | 0        | 0       | 0        | 38.8        | 174.1        |
| CD8: MMP9          | 1254     | 1084    | 1564     | 1484        | 1464         |
|                    | 1424     | 1404    | 1414     | 1634        | 1184         |
|                    | 1714     | 1214    | 1494     | 1324        | 1444         |
|                    | 1404     | 1454    | 1304     | 1394        | 1344         |
| CD8: MMP12         | 1326     | 1100.3  | 1426     | 1268.9      | 1377.4       |
|                    | 1417.4   | 1060.3  | 1603.1   | 1346        | 1286         |
|                    | 1526     | 1083.1  | 1460.3   | 906         | 1500.3       |
|                    | 1683.1   | 1157.4  | 1514.6   | 988.9       | 1480.3       |
| CD8: Cathepsin L   | 0        | 0       | 138.8    | 0           | 130          |
|                    | 94.7     | 77.1    | 0        | 0           | 197.6        |
|                    | 62.4     | 0       | 162.4    | 0           | 394.7        |
|                    | 138.8    | 0       | 0        | 53.5        | 582.9        |
| CD11b: MMP9        | 2261.3   | 1161.3  | 2130     | 1323.8      | 2255         |
|                    | 2280     | 1055    | 1961.3   | 1236.3      | 2280         |
|                    | 2411.3   | 1055    | 2180     | 1305        | 2523.8       |
|                    | 2398.8   | 948.8   | 2080     | 1367.5      | 2511.3       |
| CD11b: MMP12       | 1965     | 1150.7  | 2643.6   | 1093.6      | 2065         |
|                    | 1600.7   | 993.6   | 1807.9   | 1029.3      | 1786.4       |
|                    | 1636.4   | 657.9   | 1450.7   | 1115        | 1636.4       |
|                    | 1336.4   | 365     | 1465     | 879.3       | 1315         |
| CD11b: Cathepsin L | 127.1    | 50.6    | 153.5    | 38.8        | 68.2         |
|                    | 71.2     | 41.8    | 262.4    | 138.8       | 85.9         |
|                    | 50.6     | 77.1    | 200.6    | 121.2       | 235.9        |
|                    | 88.8     | 188.8   |          |             | 224.1        |

One-way ANOVA multiple comparison

Number of families 1  
Number of comparisons per family 10  
Alpha 0.05

CD4: MMP9

| Tukey's multiple comparisons test | Mean Diff. | 95.00% CI of dif | Significant? | Summary | Adjusted P Value |
|-----------------------------------|------------|------------------|--------------|---------|------------------|
| PBS 20hr vs. CSG 4hr              | 87.5       | -192.1 to 367.1  | No           | ns      | 0.866            |
| PBS 20hr vs. CSG 20hr             | -112.5     | -392.1 to 167.1  | No           | ns      | 0.728            |
| PBS 20hr vs. TNF-CSG 4hr          | -172.5     | -452.1 to 107.1  | No           | ns      | 0.3562           |
| PBS 20hr vs. TNF-CSG 20hr         | -660       | -939.6 to -380.4 | Yes          | ****    | <0.0001          |
| CSG 4hr vs. CSG 20hr              | -200       | -479.6 to 79.64  | No           | ns      | 0.229            |
| CSG 4hr vs. TNF-CSG 4hr           | -260       | -539.6 to 19.64  | No           | ns      | 0.0745           |
| CSG 4hr vs. TNF-CSG 20hr          | -747.5     | -1027 to -467.9  | Yes          | ****    | <0.0001          |
| CSG 20hr vs. TNF-CSG 4hr          | -60        | -339.6 to 219.6  | No           | ns      | 0.9615           |
| CSG 20hr vs. TNF-CSG 20hr         | -547.5     | -827.1 to -267.9 | Yes          | ***     | 0.0002           |
| TNF-CSG 4hr vs. TNF-CSG 20hr      | -487.5     | -767.1 to -207.9 | Yes          | ***     | 0.0006           |

CD8: MMP9

|                              |      |                 |    |    |         |
|------------------------------|------|-----------------|----|----|---------|
| PBS 20hr vs. CSG 4hr         | 160  | -168.3 to 488.3 | No | ns | 0.575   |
| PBS 20hr vs. CSG 20hr        | 5    | -323.3 to 333.3 | No | ns | >0.9999 |
| PBS 20hr vs. TNF-CSG 4hr     | -10  | -338.3 to 318.3 | No | ns | >0.9999 |
| PBS 20hr vs. TNF-CSG 20hr    | 90   | -238.3 to 418.3 | No | ns | 0.9117  |
| CSG 4hr vs. CSG 20hr         | -155 | -483.3 to 173.3 | No | ns | 0.6028  |
| CSG 4hr vs. TNF-CSG 4hr      | -170 | -498.3 to 158.3 | No | ns | 0.5201  |
| CSG 4hr vs. TNF-CSG 20hr     | -70  | -398.3 to 258.3 | No | ns | 0.9623  |
| CSG 20hr vs. TNF-CSG 4hr     | -15  | -343.3 to 313.3 | No | ns | 0.9999  |
| CSG 20hr vs. TNF-CSG 20hr    | 85   | -243.3 to 413.3 | No | ns | 0.9268  |
| TNF-CSG 4hr vs. TNF-CSG 20hr | 100  | -228.3 to 428.3 | No | ns | 0.8766  |

CD11b: MMP9

|                          |      |                |     |      |         |
|--------------------------|------|----------------|-----|------|---------|
| PBS 20hr vs. CSG 4hr     | 1283 | 1073 to 1493   | Yes | **** | <0.0001 |
| PBS 20hr vs. CSG 20hr    | 250  | 39.76 to 460.3 | Yes | *    | 0.0164  |
| PBS 20hr vs. TNF-CSG 4hr | 1030 | 819.4 to 1240  | Yes | **** | <0.0001 |

|                              |        |                  |     |      |         |
|------------------------------|--------|------------------|-----|------|---------|
| PBS 20hr vs. TNF-CSG 20hr    | -54.67 | -264.9 to 155.6  | No  | ns   | 0.9257  |
| CSG 4hr vs. CSG 20hr         | -1033  | -1243 to -822.5  | Yes | **** | <0.0001 |
| CSG 4hr vs. TNF-CSG 4hr      | -253.1 | -463.4 to -42.86 | Yes | *    | 0.0151  |
| CSG 4hr vs. TNF-CSG 20hr     | -1338  | -1548 to -1127   | Yes | **** | <0.0001 |
| CSG 20hr vs. TNF-CSG 4hr     | 779.7  | 569.4 to 989.9   | Yes | **** | <0.0001 |
| CSG 20hr vs. TNF-CSG 20hr    | -304.7 | -515 to -94.44   | Yes | **   | 0.0035  |
| TNF-CSG 4hr vs. TNF-CSG 20hr | -1084  | -1295 to -874.1  | Yes | **** | <0.0001 |

**CD4: MMP12**

|                              |        |                  |     |      |         |
|------------------------------|--------|------------------|-----|------|---------|
| PBS 20hr vs. CSG 4hr         | -104.3 | -365.5 to 156.9  | No  | ns   | 0.7333  |
| PBS 20hr vs. CSG 20hr        | -102.9 | -364.1 to 158.4  | No  | ns   | 0.7428  |
| PBS 20hr vs. TNF-CSG 4hr     | -46.43 | -307.7 to 214.8  | No  | ns   | 0.9804  |
| PBS 20hr vs. TNF-CSG 20hr    | -657.2 | -918.4 to -395.9 | Yes | **** | <0.0001 |
| CSG 4hr vs. CSG 20hr         | 1.45   | -259.8 to 262.7  | No  | ns   | >0.9999 |
| CSG 4hr vs. TNF-CSG 4hr      | 57.87  | -203.4 to 319.1  | No  | ns   | 0.9569  |
| CSG 4hr vs. TNF-CSG 20hr     | -552.9 | -814.1 to -291.6 | Yes | **** | <0.0001 |
| CSG 20hr vs. TNF-CSG 4hr     | 56.42  | -204.8 to 317.7  | No  | ns   | 0.9606  |
| CSG 20hr vs. TNF-CSG 20hr    | -554.3 | -815.5 to -293.1 | Yes | **** | <0.0001 |
| TNF-CSG 4hr vs. TNF-CSG 20hr | -610.7 | -872 to -349.5   | Yes | **** | <0.0001 |

**CD8: MMP12**

|                              |        |                  |     |    |         |
|------------------------------|--------|------------------|-----|----|---------|
| PBS 20hr vs. CSG 4hr         | 387.9  | 100.8 to 674.9   | Yes | ** | 0.0062  |
| PBS 20hr vs. CSG 20hr        | -12.88 | -300 to 274.2    | No  | ns | >0.9999 |
| PBS 20hr vs. TNF-CSG 4hr     | 360.7  | 73.58 to 647.8   | Yes | *  | 0.011   |
| PBS 20hr vs. TNF-CSG 20hr    | 77.13  | -210 to 364.2    | No  | ns | 0.9173  |
| CSG 4hr vs. CSG 20hr         | -400.7 | -687.8 to -113.6 | Yes | ** | 0.0048  |
| CSG 4hr vs. TNF-CSG 4hr      | -27.18 | -314.3 to 259.9  | No  | ns | 0.9982  |
| CSG 4hr vs. TNF-CSG 20hr     | -310.7 | -597.8 to -23.63 | Yes | *  | 0.031   |
| CSG 20hr vs. TNF-CSG 4hr     | 373.6  | 86.45 to 660.6   | Yes | ** | 0.0084  |
| CSG 20hr vs. TNF-CSG 20hr    | 90     | -197.1 to 377.1  | No  | ns | 0.8652  |
| TNF-CSG 4hr vs. TNF-CSG 20hr | -283.6 | -570.6 to 3.545  | No  | ns | 0.0537  |

**CD11b:MMP12**

|                              |        |                 |     |    |        |
|------------------------------|--------|-----------------|-----|----|--------|
| PBS 20hr vs. CSG 4hr         | 842.8  | 79.17 to 1606   | Yes | *  | 0.0273 |
| PBS 20hr vs. CSG 20hr        | -207.2 | -970.8 to 556.5 | No  | ns | 0.9146 |
| PBS 20hr vs. TNF-CSG 4hr     | 605.3  | -158.3 to 1369  | No  | ns | 0.1559 |
| PBS 20hr vs. TNF-CSG 20hr    | -66.08 | -829.7 to 697.6 | No  | ns | 0.9987 |
| CSG 4hr vs. CSG 20hr         | -1050  | -1814 to -286.3 | Yes | ** | 0.0054 |
| CSG 4hr vs. TNF-CSG 4hr      | -237.5 | -1001 to 526.2  | No  | ns | 0.8684 |
| CSG 4hr vs. TNF-CSG 20hr     | -908.9 | -1673 to -145.2 | Yes | *  | 0.0163 |
| CSG 20hr vs. TNF-CSG 4hr     | 812.5  | 48.85 to 1576   | Yes | *  | 0.0345 |
| CSG 20hr vs. TNF-CSG 20hr    | 141.1  | -622.6 to 904.8 | No  | ns | 0.9774 |
| TNF-CSG 4hr vs. TNF-CSG 20hr | -671.4 | -1435 to 92.25  | No  | ns | 0.0985 |

**Non-parametric analysis: Kruskal Wallis Test**

**CD4: Cathepsin L**

| Dunn's multiple comparisons test | Mean rank diff. | Significant? | Summary | Adjusted P Value |
|----------------------------------|-----------------|--------------|---------|------------------|
| PBS 20hr vs. CSG 4hr             | -7.167          | No           | ns      | 0.6329           |
| PBS 20hr vs. CSG 20hr            | -1.5            | No           | ns      | >0.9999          |
| PBS 20hr vs. TNF-CSG 4hr         | -4.125          | No           | ns      | >0.9999          |
| PBS 20hr vs. TNF-CSG 20hr        | -8              | No           | ns      | 0.2514           |
| CSG 4hr vs. CSG 20hr             | 5.667           | No           | ns      | >0.9999          |
| CSG 4hr vs. TNF-CSG 4hr          | 3.042           | No           | ns      | >0.9999          |
| CSG 4hr vs. TNF-CSG 20hr         | -0.8333         | No           | ns      | >0.9999          |
| CSG 20hr vs. TNF-CSG 4hr         | -2.625          | No           | ns      | >0.9999          |
| CSG 20hr vs. TNF-CSG 20hr        | -6.5            | No           | ns      | 0.6885           |
| TNF-CSG 4hr vs. TNF-CSG 20hr     | -3.875          | No           | ns      | >0.9999          |

**CD8: Cathepsin L**

|                              |        |     |    |         |
|------------------------------|--------|-----|----|---------|
| PBS 20hr vs. CSG 4hr         | 4.375  | No  | ns | >0.9999 |
| PBS 20hr vs. CSG 20hr        | 0.5    | No  | ns | >0.9999 |
| PBS 20hr vs. TNF-CSG 4hr     | 4.875  | No  | ns | >0.9999 |
| PBS 20hr vs. TNF-CSG 20hr    | -6.625 | No  | ns | 0.9671  |
| CSG 4hr vs. CSG 20hr         | -3.875 | No  | ns | >0.9999 |
| CSG 4hr vs. TNF-CSG 4hr      | 0.5    | No  | ns | >0.9999 |
| CSG 4hr vs. TNF-CSG 20hr     | -11    | No  | ns | 0.0582  |
| CSG 20hr vs. TNF-CSG 4hr     | 4.375  | No  | ns | >0.9999 |
| CSG 20hr vs. TNF-CSG 20hr    | -7.125 | No  | ns | 0.7403  |
| TNF-CSG 4hr vs. TNF-CSG 20hr | -11.5  | Yes | *  | 0.0394  |

**CD11b: Cathepsin L**

|                              |         |    |    |         |
|------------------------------|---------|----|----|---------|
| PBS 20hr vs. CSG 4hr         | 0.75    | No | ns | >0.9999 |
| PBS 20hr vs. CSG 20hr        | -7.958  | No | ns | 0.5084  |
| PBS 20hr vs. TNF-CSG 4hr     | -0.2917 | No | ns | >0.9999 |
| PBS 20hr vs. TNF-CSG 20hr    | -4.125  | No | ns | >0.9999 |
| CSG 4hr vs. CSG 20hr         | -8.708  | No | ns | 0.3261  |
| CSG 4hr vs. TNF-CSG 4hr      | -1.042  | No | ns | >0.9999 |
| CSG 4hr vs. TNF-CSG 20hr     | -4.875  | No | ns | >0.9999 |
| CSG 20hr vs. TNF-CSG 4hr     | 7.667   | No | ns | 0.7845  |
| CSG 20hr vs. TNF-CSG 20hr    | 3.833   | No | ns | >0.9999 |
| TNF-CSG 4hr vs. TNF-CSG 20hr | -3.833  | No | ns | >0.9999 |
