# Supplementary material for: Immune‐mediated ECM depletion improves tumour perfusion and payload delivery
Source: PubMed Central journal article supplement (PMC6895610; doi:10.15252/emmm.201910923), 2019-11-11
Supplement: EMMM-11-e10923-s006.pdf [file EMMM-11-e10923-s006.pdf]

Figure 4A RIP1-Tag 5

Laminin

CSG

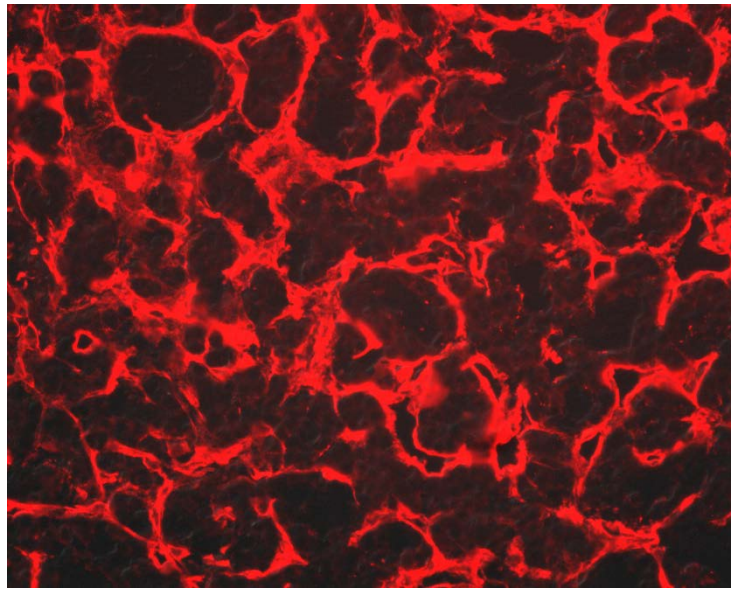

TNF-RGR

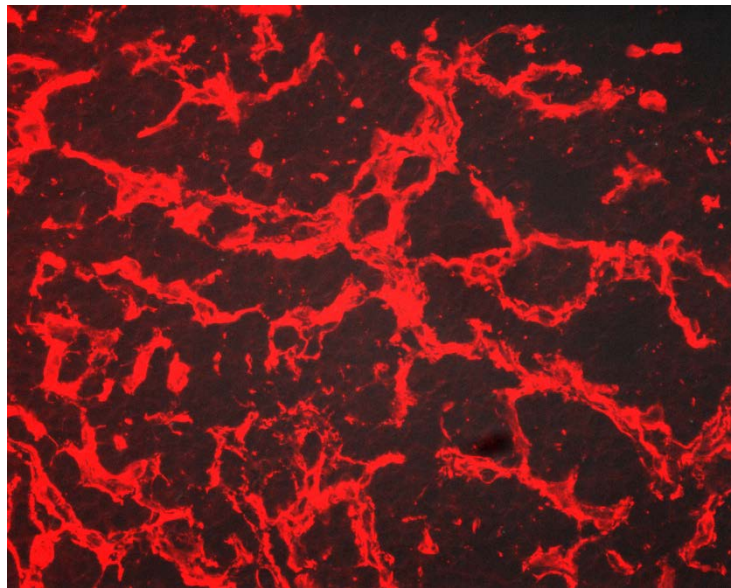

TNF-CSG

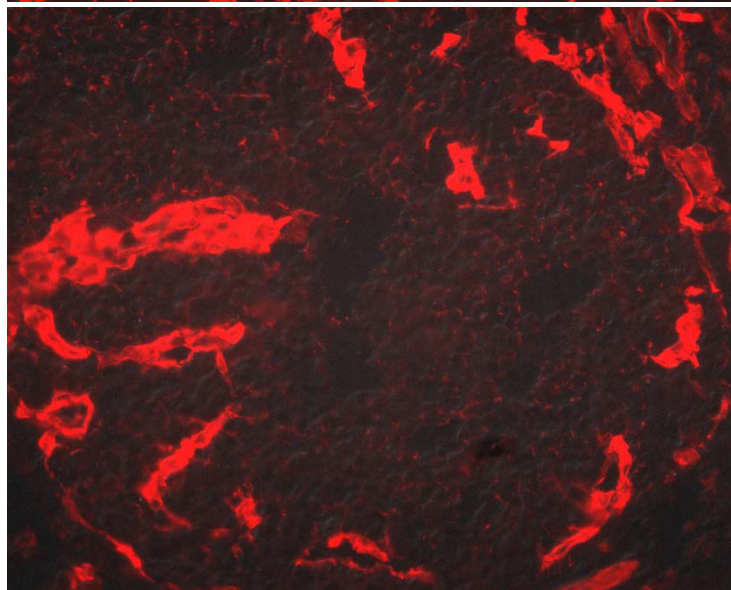

Figure 4A RIP1-Tag 5

Nidogen-1

CSG

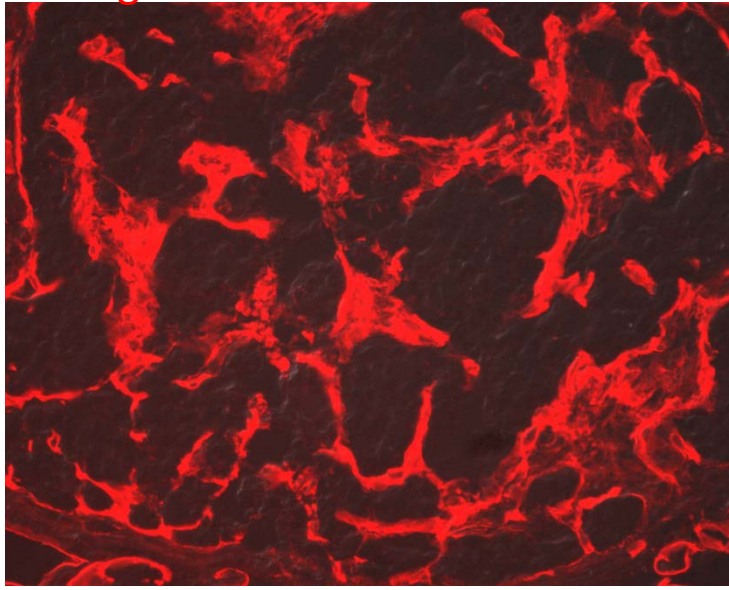

TNF-RGR

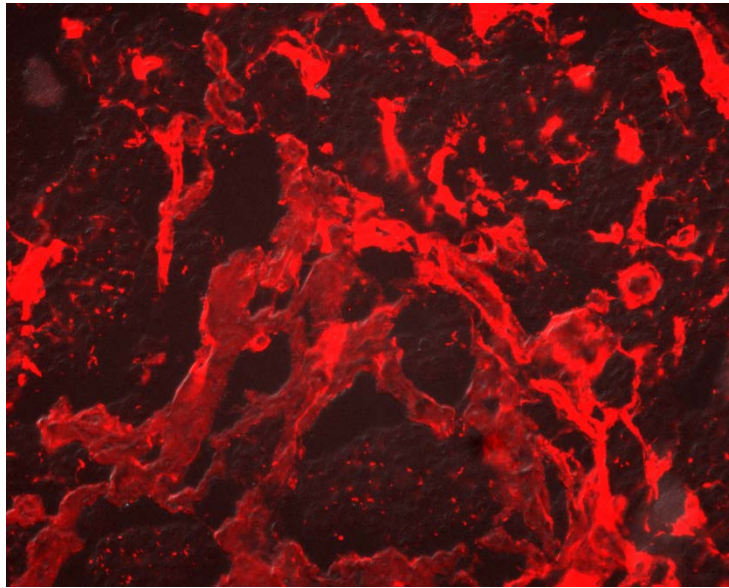

TNF-CSG

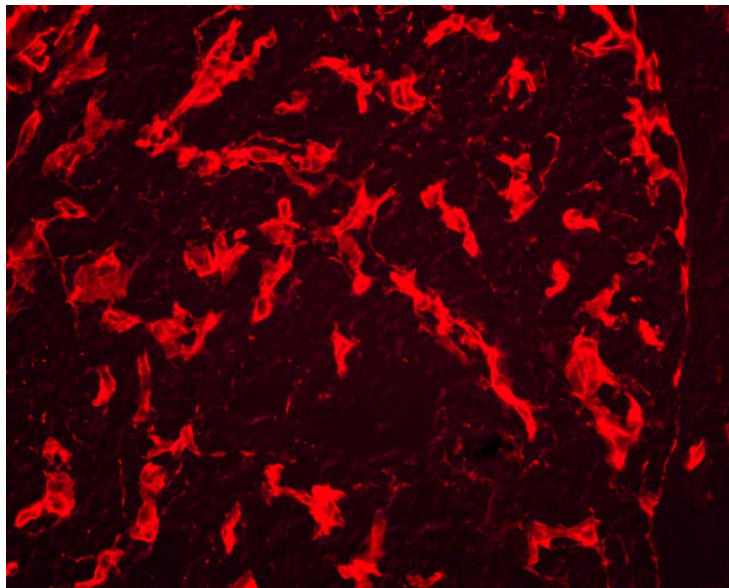

Figure 4A RIP1-Tag 5

Collagen-IV

CSG

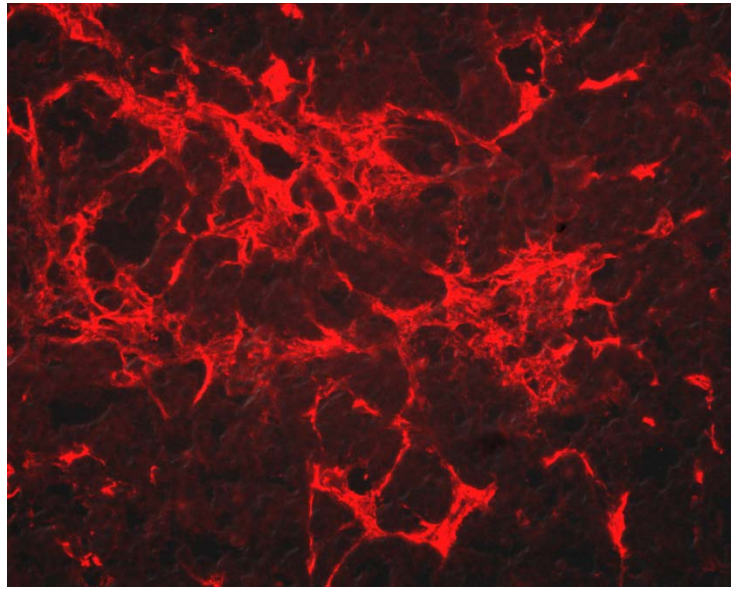

TNF-RGR

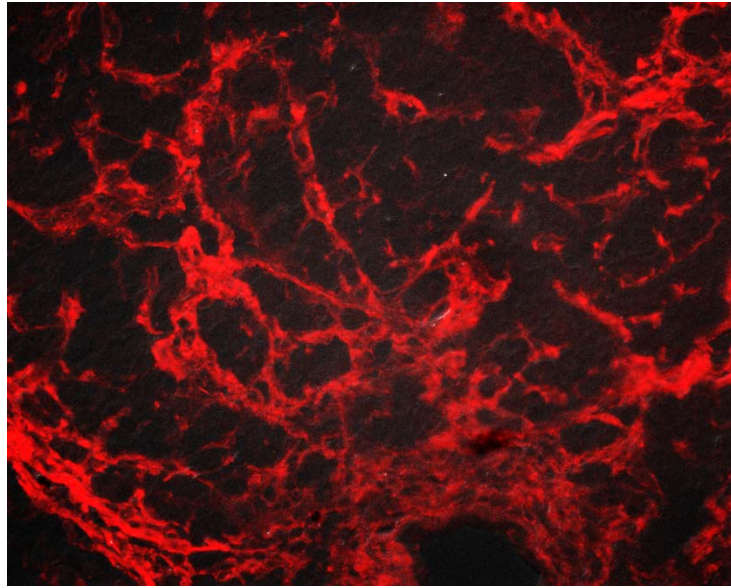

TNF-CSG

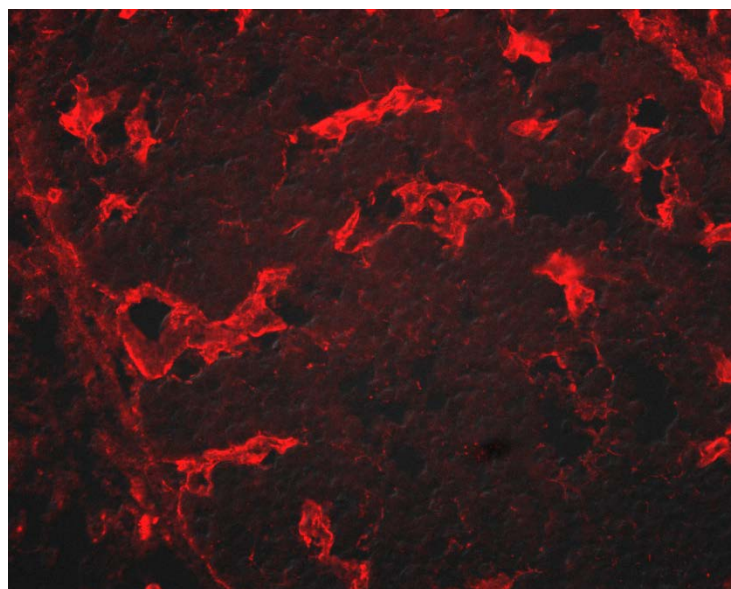

**Figure 4B: % of staining/area**

**Laminin**

| Untreated | CSG   | TNF-RGR 5 ug | TNF-CSG 2 ug | TNF-CSG 5 ug |
|-----------|-------|--------------|--------------|--------------|
| 18.65     | 16.6  | 9.67         | 5.36         | 8.15         |
| 17.37     | 13.29 | 11.07        | 11.69        | 8.48         |
| 15.55     | 17.99 | 14.01        | 11           | 6.25         |
|           | 11.14 | 22.79        | 7.04         | 12.24        |
|           | 14.31 | 13.7         | 10.22        | 8.44         |
|           | 12.56 | 12.64        | 10.09        | 8.03         |
|           |       | 20.6         |              |              |
|           |       | 16.28        |              |              |

**Nidogen 1**

| Untreated | CSG   | TNF-RGR 5 ug | TNF-CSG 2 ug | TNF-CSG 5 ug |
|-----------|-------|--------------|--------------|--------------|
| 14.77     | 16.3  | 16.42        | 12.37        | 12.08        |
| 15.32     | 11.37 | 20.19        | 6.25         | 5.12         |
| 17.66     | 15.17 | 14.72        | 8.1          | 9.97         |
|           | 14.76 | 15.71        | 7.2          | 10.5         |
|           | 20.63 | 20.7         | 11.05        | 10.72        |
|           | 19.73 | 12.33        | 10.2         | 11.23        |
|           |       | 12.16        |              |              |
|           |       | 16.15        |              |              |

| Untreated | CSG   | TNF-RGR 5 ug | TNF-CSG 2 ug | TNF-CSG 5 ug |
|-----------|-------|--------------|--------------|--------------|
| 19.2      | 11.76 | 12.77        | 5.82         | 11.2         |
| 11.33     | 12.2  | 13.3         | 6.66         | 8.3          |
| 17.4      | 15.55 | 10.7         | 7.98         | 5.99         |
|           | 18.2  | 16.86        | 10.33        | 11.67        |
|           | 12.67 | 17.22        | 10.19        | 10.29        |
|           | 21.23 | 20.75        | 7.22         | 5.62         |
|           |       | 19.59        |              |              |

**One-way ANOVA multiple comparison**

| Tukey's multiple comparisons test | Mean Diff. | 95.00% CI of diff. | Significant? | Summary | Adjusted P Value |
|-----------------------------------|------------|--------------------|--------------|---------|------------------|
| <b>Laminin</b>                    |            |                    |              |         |                  |
| Untreated vs. CSG                 | 2.875      | -3.623 to 9.3      | No           | ns      | 0.6917           |
| Untreated vs. TNF-RGR 5 ug        | 2.095      | -4.126 to 8.3      | No           | ns      | 0.8563           |
| Untreated vs. TNF-CSG 2 ug        | 7.957      | 1.459 to 14.4      | Yes          | *       | 0.0112           |
| Untreated vs. TNF-CSG 5 ug        | 8.592      | 2.094 to 15.0      | Yes          | **      | 0.0056           |
| CSG vs. TNF-RGR 5 ug              | -0.78      | -5.743 to 4.1      | No           | ns      | 0.9899           |
| CSG vs. TNF-CSG 2 ug              | 5.082      | -0.2238 to 10.39   | No           | ns      | 0.0651           |
| CSG vs. TNF-CSG 5 ug              | 5.717      | 0.4112 to 11.02    | Yes          | *       | 0.0303           |
| TNF-RGR 5 ug vs. TNF-CSG 2 ug     | 5.862      | 0.8988 to 10.82    | Yes          | *       | 0.0151           |
| TNF-RGR 5 ug vs. TNF-CSG 5 ug     | 6.497      | 1.534 to 11.46     | Yes          | **      | 0.0062           |
| TNF-CSG 2 ug vs. TNF-CSG 5 ug     | 0.635      | -4.67 to 5.94      | No           | ns      | 0.9965           |
| <b>Nidogen-1</b>                  |            |                    |              |         |                  |
| Untreated vs. CSG                 | -0.41      | -6.298 to 5.4      | No           | ns      | 0.9996           |
| Untreated vs. TNF-RGR 5 ug        | -0.1308    | -5.768 to 5.5      | No           | ns      | >0.9999          |
| Untreated vs. TNF-CSG 2 ug        | 6.722      | 0.8339 to 12.61    | Yes          | *       | 0.0197           |
| Untreated vs. TNF-CSG 5 ug        | 5.98       | 0.09225 to 11.87   | Yes          | *       | 0.0453           |

|                               |         |               |     |    |         |
|-------------------------------|---------|---------------|-----|----|---------|
| CSG vs. TNF-RGR 5 ug          | 0.2792  | -4.218 to 4.7 | No  | ns | 0.9997  |
| CSG vs. TNF-CSG 2 ug          | 7.132   | 2.324 to 11.5 | Yes | ** | 0.0018  |
| CSG vs. TNF-CSG 5 ug          | 6.39    | 1.583 to 11.2 | Yes | ** | 0.0053  |
| TNF-RGR 5 ug vs. TNF-CSG 2 ug | 6.853   | 2.356 to 11.3 | Yes | ** | 0.0013  |
| TNF-RGR 5 ug vs. TNF-CSG 5 ug | 6.111   | 1.614 to 10.6 | Yes | ** | 0.0043  |
| TNF-CSG 2 ug vs. TNF-CSG 5 ug | -0.7417 | -5.549 to 4.0 | No  | ns | 0.9906  |
| <b>Colagen IV</b>             |         |               |     |    |         |
| Untreated vs. CSG             | 0.7083  | -6.071 to 7.4 | No  | ns | 0.9979  |
| Untreated vs. TNF-RGR 5 ug    | 0.09238 | -6.523 to 6.7 | No  | ns | >0.9999 |
| Untreated vs. TNF-CSG 2 ug    | 7.943   | 1.164 to 14.7 | Yes | *  | 0.0163  |
| Untreated vs. TNF-CSG 5 ug    | 7.132   | 0.3525 to 13  | Yes | *  | 0.0359  |
| CSG vs. TNF-RGR 5 ug          | -0.616  | -5.95 to 4.71 | No  | ns | 0.9969  |
| CSG vs. TNF-CSG 2 ug          | 7.235   | 1.7 to 12.77  | Yes | ** | 0.0064  |
| CSG vs. TNF-CSG 5 ug          | 6.423   | 0.8882 to 11  | Yes | *  | 0.0175  |
| TNF-RGR 5 ug vs. TNF-CSG 2 ug | 7.851   | 2.517 to 13.1 | Yes | ** | 0.002   |
| TNF-RGR 5 ug vs. TNF-CSG 5 ug | 7.039   | 1.705 to 12.3 | Yes | ** | 0.0058  |
| TNF-CSG 2 ug vs. TNF-CSG 5 ug | -0.8117 | -6.347 to 4.7 | No  | ns | 0.9921  |

**Figure 4D: Correlation CD45+ cells and COL-IV staining**

| COL-IV | CD45+  |
|--------|--------|
| 19.735 | 7.228  |
| 7.153  | 10.898 |
| 3.65   | 13.7   |
| 30.12  | 6.06   |
| 1.457  | 12.178 |
| 13.828 | 7.932  |
| 2.533  | 13.55  |
| 21.143 | 6.8    |
| 7.544  | 7.237  |
| 3.043  | 8.927  |

|                               |         |
|-------------------------------|---------|
| Spearman r                    |         |
| r                             | -0.8788 |
| 95% confidence interval       |         |
| P value                       |         |
| P (two-tailed)                | 0.0016  |
| P value summary               | **      |
| Exact or approximate P value? | Exact   |
| Significant? (alpha = 0.05)   | Yes     |
| Number of XY Pairs            | 10      |
