# Supplementary material for: Immune‐mediated ECM depletion improves tumour perfusion and payload delivery
Source: PubMed Central journal article supplement (PMC6895610; doi:10.15252/emmm.201910923), 2019-11-11
Supplement: EMMM-11-e10923-s007.pdf [file EMMM-11-e10923-s007.pdf]

**Figure 5D: 4T1 tumour >100 kPa**

| CSG   | TNF-CSG |
|-------|---------|
| 10.56 | 0.8     |
| 4.57  | 1.33    |
| 5.6   | 0.68    |

**Figure 5D: 4T1 tumour stiffness variance**

| CSG   | TNF-CSG |
|-------|---------|
| 0.279 | 0.132   |
| 0.249 | 0.181   |
| 0.25  | 0.078   |

**Unpaired T test**

| Table Analyzed                      | 4T1 >100 kPa         | Table Analyzed                      | 4T1 variance           |
|-------------------------------------|----------------------|-------------------------------------|------------------------|
| Column B                            | 4T1-TNF-CSG          | Column B                            | 4T1-TNF-CSG            |
| vs.                                 | vs.                  | vs.                                 | vs.                    |
| Column A                            | 4T1-CSG              | Column A                            | 4T1-CSG                |
| Unpaired t test                     |                      | Unpaired t test                     |                        |
| P value                             | 0.0325               | P value                             | 0.0146                 |
| P value summary                     | *                    | P value summary                     | *                      |
| Significantly different (P < 0.05)? | Yes                  | Significantly different (P < 0.05)? | Yes                    |
| One- or two-tailed P value?         | Two-tailed           | One- or two-tailed P value?         | Two-tailed             |
| t, df                               | t=3.212 df=4         | t, df                               | t=4.117 df=4           |
| How big is the difference?          |                      | How big is the difference?          |                        |
| Mean ± SEM of column A              | 6.91 ± 1.849, n=3    | Mean ± SEM of column A              | 0.2593 ± 0.009838, n=3 |
| Mean ± SEM of column B              | 0.9367 ± 0.1997, n=3 | Mean ± SEM of column B              | 0.1303 ± 0.02975, n=3  |
| Difference between means            | -5.973 ± 1.86        | Difference between means            | -0.129 ± 0.03133       |
| 95% confidence interval             | -11.14 to -0.8097    | 95% confidence interval             | -0.216 to -0.04201     |
| R squared (eta squared)             | 0.7206               | R squared (eta squared)             | 0.8091                 |
| F test to compare variances         |                      | F test to compare variances         |                        |
| F, DFn, Dfd                         | 85.74, 2, 2          | F, DFn, Dfd                         | 9.142, 2, 2            |
| P value                             | 0.0231               | P value                             | 0.1972                 |
| P value summary                     | *                    | P value summary                     | ns                     |
| Significantly different (P < 0.05)? | Yes                  | Significantly different (P < 0.05)? | No                     |
