# Supplementary material for: Immune‐mediated ECM depletion improves tumour perfusion and payload delivery
Source: PubMed Central journal article supplement (PMC6895610; doi:10.15252/emmm.201910923), 2019-11-11
Supplement: EMMM-11-e10923-s008.pdf [file EMMM-11-e10923-s008.pdf]

Figure 6A

Lectin/DAPI

CSG

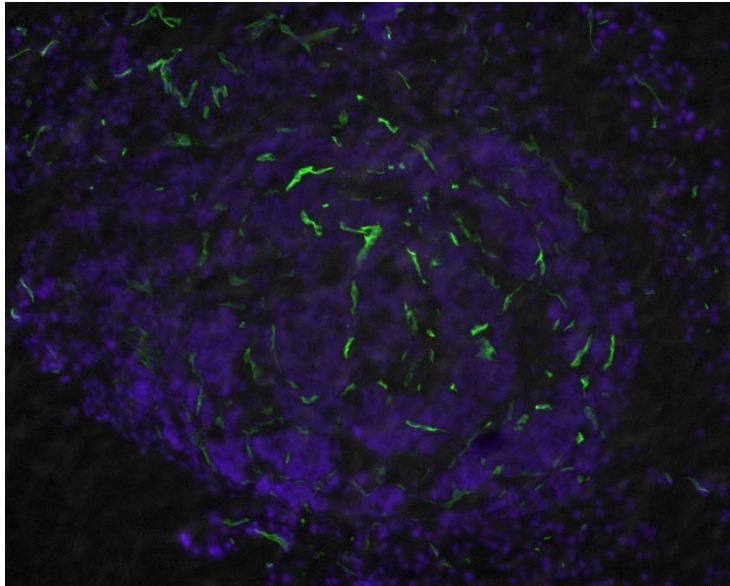

TNF-CSG

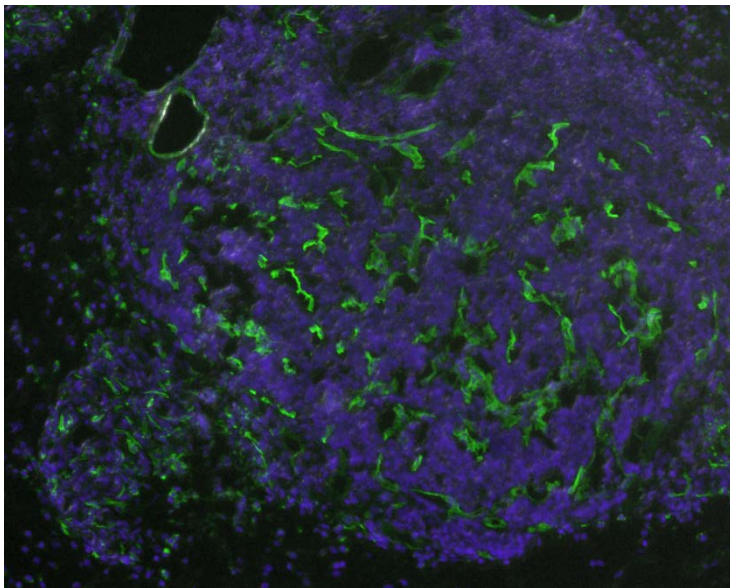

TNF-RGR

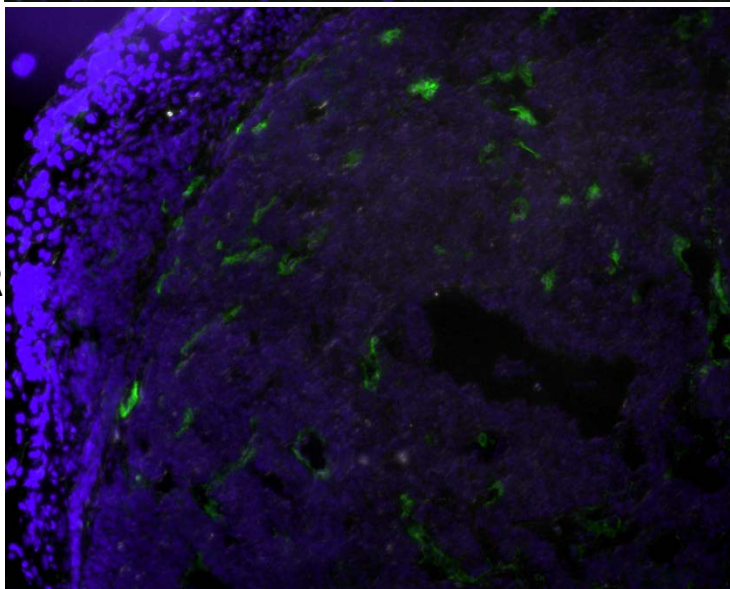

Figure 6B

Lectin/CD31

CSG

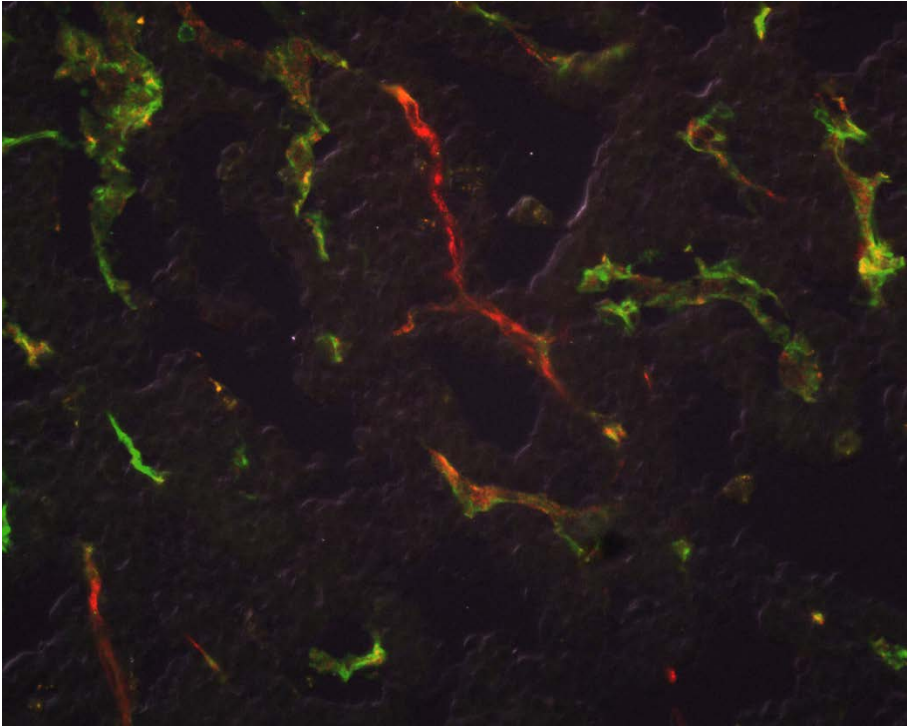

TNF-CSG

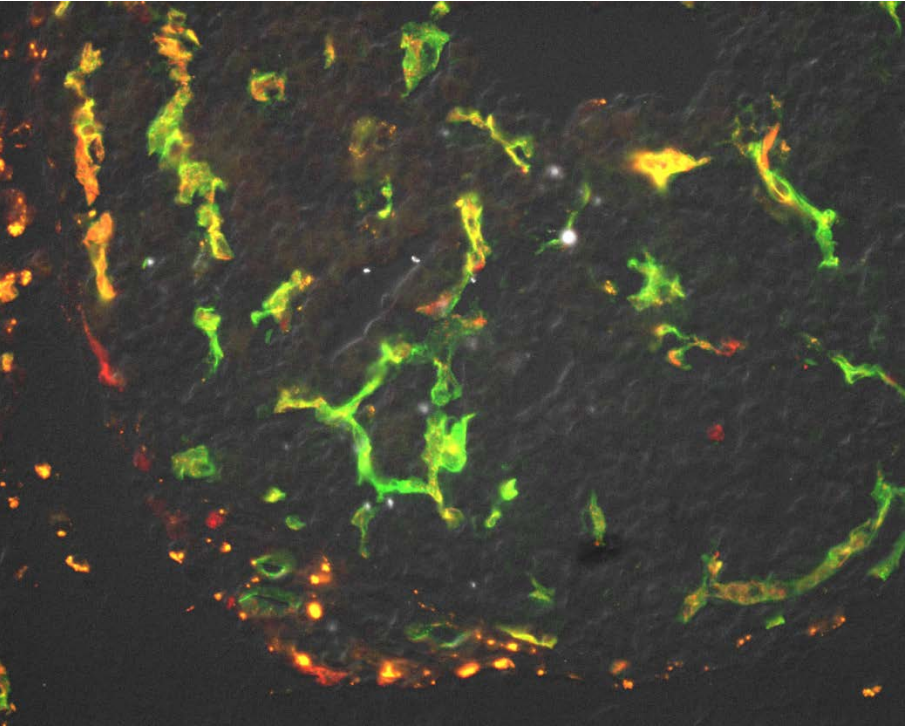

Figure 6C

Lectin/Col-IV

CSG

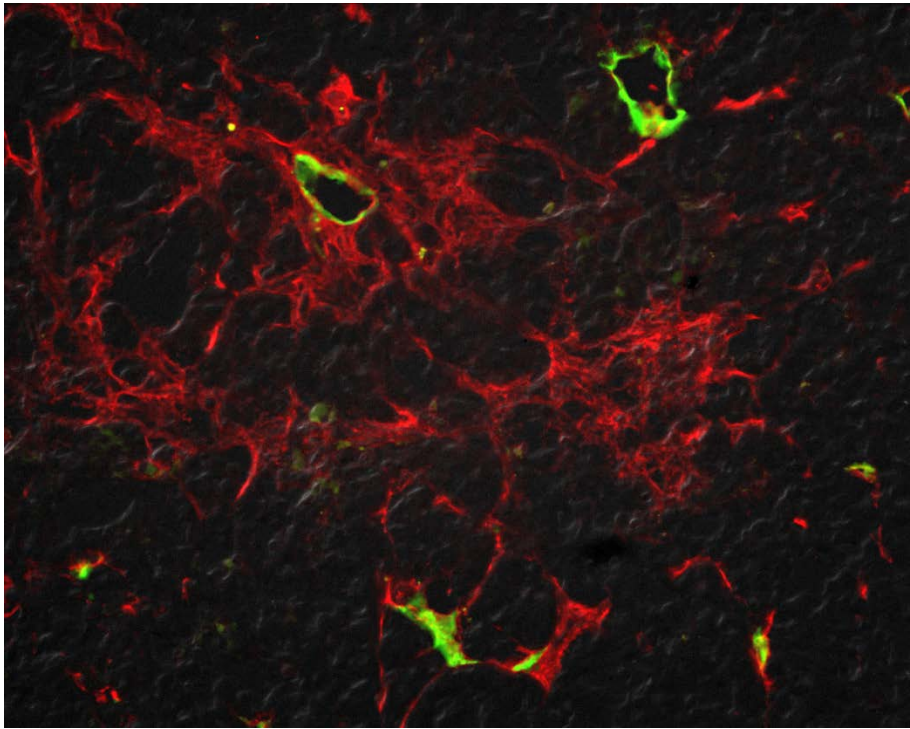

TNF-CSG

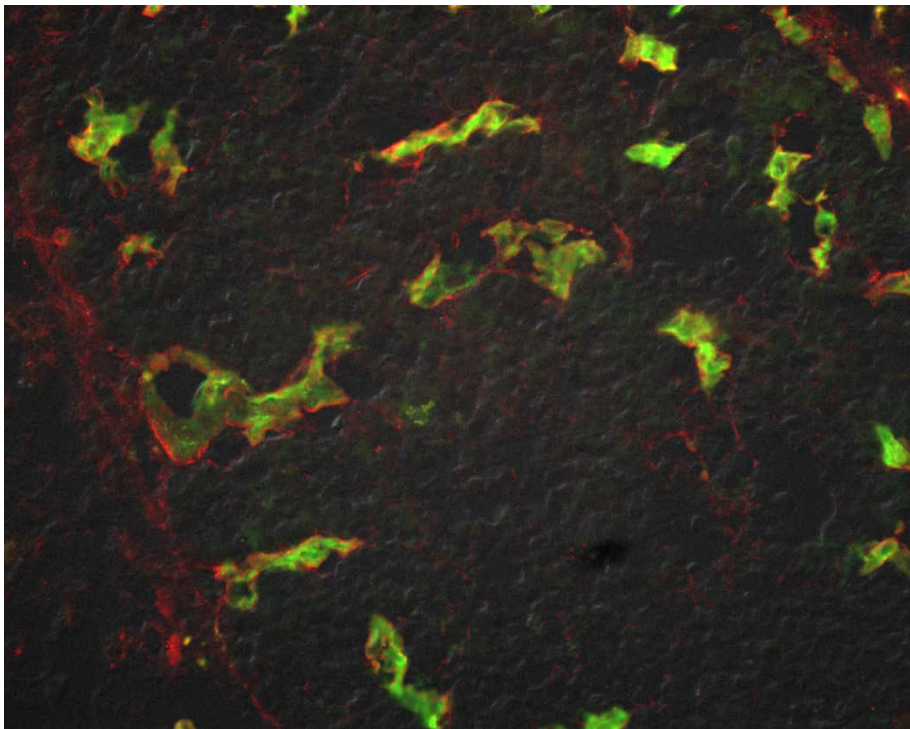

**Figure 6A: Mean vessel diameter/tumour**

| PBS      | CSG      | TNF-RGR  | TNF-CSG 5 ug |
|----------|----------|----------|--------------|
| 6.9265   | 5.855714 | 5.075294 | 15.15684     |
| 4.174615 | 5.569048 | 6.57     | 14.245       |
| 4.237692 | 5.063077 | 4.036    | 6.917143     |
| 7.085882 | 7.435    | 5.165    | 18.015       |
| 5.6785   | 4.772    | 4.487273 | 18.53375     |
| 5.365    | 5.114167 | 4.511818 | 8.907778     |
| 7.417    | 6.249412 | 3.2475   | 14.112       |
| 2.61     | 5.731667 | 7.45     | 15.85692     |
| 2.350588 | 4.885334 | 5.78     | 12.65769     |
| 4.32     | 4.667619 | 5.2      | 12.295       |
| 5.301875 | 5.716667 | 3.32     | 11.57286     |
| 5.270769 | 4.137143 | 2.17     | 15.97429     |
|          |          |          | 13.89125     |
|          |          |          | 10.35571     |
|          |          |          | 18.715       |

**One-way ANOVA multiple comparison**

|                       |      |
|-----------------------|------|
| Number of families    | 1    |
| Number of comparisons | 6    |
| Alpha                 | 0.05 |

| Tukey's multiple comparisons test | Mean Diff. | 95.00% CI of diff. | Significant? | Summary | Adjusted P Value |
|-----------------------------------|------------|--------------------|--------------|---------|------------------|
| PBS vs. CSG                       | -0.3715    | -2.768 to 2.0      | No           | ns      | 0.976            |
| PBS vs. TNF-RGR                   | 0.3105     | -2.086 to 2.7      | No           | ns      | 0.9857           |
| PBS vs. TNF-CSG 5 ug              | -8.752     | -11.03 to -6.4     | Yes          | ****    | <0.0001          |
| CSG vs. TNF-RGR                   | 0.682      | -1.714 to 3.0      | No           | ns      | 0.8727           |
| CSG vs. TNF-CSG 5 ug              | -8.381     | -10.65 to -6.1     | Yes          | ****    | <0.0001          |
| TNF-RGR vs. TNF-CSG               | -9.063     | -11.34 to -6.7     | Yes          | ****    | <0.0001          |

**Figure 6B: Ratio Lectin: CD31**

| Untreated | CSG       | TNF-CSG2 ug | TNF-CSG 5 ug |
|-----------|-----------|-------------|--------------|
| 0.8746594 | 0.8107527 | 1.017978    | 1.360656     |
| 0.531854  | 0.730631  | 0.9949324   | 1.197379     |
| 0.7133758 | 0.7985294 | 1.029126    | 1.75502      |
| 0.8688712 | 0.8814815 | 1.01222     | 1.188848     |
| 0.7438825 | 0.6058172 | 1.182712    | 0.8644068    |
|           |           |             | 1.154545     |
|           |           |             | 1.035565     |

**One-way ANOVA multiple comparison**

|                       |      |
|-----------------------|------|
| Number of families    | 1    |
| Number of comparisons | 6    |
| Alpha                 | 0.05 |

| Tukey's multiple comparisons test | Mean Diff. | 95.00% CI of diff. | Significant? | Summary | Adjusted P Value |
|-----------------------------------|------------|--------------------|--------------|---------|------------------|
| Untreated vs. CSG                 | -0.01891   | -0.35 to 0.31      | No           | ns      | 0.9984           |
| Untreated vs. TNF-CSG2            | -0.3009    | -0.632 to 0.0      | No           | ns      | 0.0826           |
| Untreated vs. TNF-CSG             | -0.4758    | -0.7824 to -0.1692 | Yes          | **      | 0.0018           |
| CSG vs. TNF-CSG2 ug               | -0.282     | -0.6131 to 0.0     | No           | ns      | 0.1115           |

|                       |         |               |     |    |        |
|-----------------------|---------|---------------|-----|----|--------|
| CSG vs. TNF-CSG 5 ug  | -0.4569 | -0.7634 to -0 | Yes | ** | 0.0027 |
| TNF-CSG2 ug vs. TNF-C | -0.175  | -0.4815 to 0  | No  | ns | 0.3965 |

**Figure 6C: Correlation lectin and Collagen IV**

|           | Collagen IV | Lectin |
|-----------|-------------|--------|
| Untreated | 19.2        | 2.99   |
| Untreated | 11.33       | 1.79   |
| Untreated | 17.4        | 2.15   |
| CSG       | 11.76       | 1.9    |
| CSG       | 12.2        | 3.41   |
| CSG       | 15.55       | 1.56   |
| CSG       | 18.2        | 3.55   |
| CSG       | 12.67       | 3.33   |
| CSG       | 21.23       | 2.11   |
| TNF-RGR   | 12.77       | 1.73   |
| TNF-RGR   | 13.3        | 0.62   |
| TNF-RGR   | 10.7        | 1.28   |
| TNF-RGR   | 16.86       | 2.32   |
| TNF-RGR   | 17.22       | 1.4    |
| TNF-RGR   | 20.75       | 3.7    |
| TNF-RGR   | 19.59       | 2.7    |
| TNF-CSG   | 5.82        | 4.34   |
| TNF-CSG   | 6.66        | 4.42   |
| TNF-CSG   | 7.98        | 5.7    |
| TNF-CSG   | 10.33       | 3.76   |
| TNF-CSG   | 10.19       | 3.33   |
| TNF-CSG   | 7.22        | 4.67   |
| TNF-CSG   | 11.2        | 3.33   |
| TNF-CSG   | 8.3         | 5.4    |
| TNF-CSG   | 5.99        | 5.51   |
| TNF-CSG   | 11.67       | 4.87   |
| TNF-CSG   | 10.29       | 7.57   |
| TNF-CSG   | 5.62        | 5.58   |

| Pearson r                   |                    |
|-----------------------------|--------------------|
| r                           | -0.5427            |
| 95% confidence interval     | -0.7616 to -0.2126 |
| R squared                   | 0.2945             |
| P value                     |                    |
| P (two-tailed)              | 0.0028             |
| P value summary             | **                 |
| Significant? (alpha = 0.05) | Yes                |
| Number of XY Pairs          | 28                 |

**Figure 6D: Kinetic constant**

| CSG      | TNFa-CSG |
|----------|----------|
| 0.042831 | 0.082653 |
| 0.064268 | 0.085991 |
| 0.052241 | 0.12851  |
| 0.030594 | 0.083735 |
|          | 0.066646 |

### Unpaired t-test

|                              |                         |  |
|------------------------------|-------------------------|--|
| Table Analyzed               | Kinetic constant        |  |
| Column B                     | TNFa-CSG                |  |
| vs.                          | vs.                     |  |
| Column A                     | CSG                     |  |
| Unpaired t test              |                         |  |
| P value                      | 0.0159                  |  |
| P value summary              | *                       |  |
| Significantly different (P < | Yes                     |  |
| One- or two-tailed P valu    | Two-tailed              |  |
| t, df                        | t=3.162 df=7            |  |
| How big is the difference?   |                         |  |
| Mean ± SEM of column A       | 0.04748 ± 0.007137, n=4 |  |
| Mean ± SEM of column B       | 0.08951 ± 0.01034, n=5  |  |
| Difference between mea       | 0.04202 ± 0.01329       |  |
| 95% confidence interval      | 0.0106 to 0.07345       |  |
| R squared (eta squared)      | 0.5882                  |  |

**Figure 6E: T2 relaxation time (ms)/tumour)**

| CSG      | TNF-CSG 10 ug |
|----------|---------------|
| 50.18273 | 39.085        |
| 61.89    | 42.73667      |
| 52.93    | 31.065        |
| 63.02    | 35.85         |
| 53.66    | 41.775        |
|          | 37.675        |
|          | 43.28         |
|          | 43.06         |
|          | 35.52         |
|          | 35.61         |

### Unpaired t-test

|                              |                     |  |
|------------------------------|---------------------|--|
| Table Analyzed               | RIPTag5             |  |
| Column B                     | TNF-CSG 10 ug       |  |
| vs.                          | vs.                 |  |
| Column A                     | CSG                 |  |
| Unpaired t test              |                     |  |
| P value                      | <0.0001             |  |
| P value summary              | ****                |  |
| Significantly different (P < | Yes                 |  |
| One- or two-tailed P valu    | Two-tailed          |  |
| t, df                        | t=6.93 df=13        |  |
| How big is the difference?   |                     |  |
| Mean ± SEM of column A       | 56.34 ± 2.57, n=5   |  |
| Mean ± SEM of column B       | 38.57 ± 1.303, n=10 |  |
| Difference between mea       | -17.77 ± 2.564      |  |
| 95% confidence interval      | -23.31 to -12.23    |  |

|                         |       |
|-------------------------|-------|
| R squared (eta squared) | 0.787 |
|-------------------------|-------|

**Figure 6F: % IO NPs accumulation in tumours (anti-FITC)**

| CSG | TNFa-CSG |
|-----|----------|
| 0.1 | 19.2     |
| 0.2 | 2.9      |
| 0.2 | 3        |
| 3.8 | 1.6      |
| 4   | 5.2      |
| 4   | 6        |
|     | 10.1     |
|     | 10.7     |
|     | 8.8      |

**Unpaired t-test**

| Table Analyzed               | IO micelles uptake |
|------------------------------|--------------------|
| Column B                     | TNFa-CSG           |
| vs.                          | vs.                |
| Column A                     | CSG                |
| Unpaired t test              |                    |
| P value                      | 0.038              |
| P value summary              | *                  |
| Significantly different (P < | Yes                |
| One- or two-tailed P value   | Two-tailed         |
| t, df                        | t=2.309 df=13      |
| How big is the difference?   |                    |
| Mean ± SEM of column A       | 2.05 ± 0.8429, n=6 |
| Mean ± SEM of column B       | 7.5 ± 1.823, n=9   |
| Difference between mean      | 5.45 ± 2.36        |
| 95% confidence interval      | 0.3516 to 10.55    |
| R squared (eta squared)      | 0.2909             |
| F test to compare variances  |                    |
| F, DFn, Dfd                  | 7.018, 8, 5        |
| P value                      | 0.0461             |
| P value summary              | *                  |
| Significantly different (P < | Yes                |
