# Supplementary material for: Immune‐mediated ECM depletion improves tumour perfusion and payload delivery
Source: PubMed Central journal article supplement (PMC6895610; doi:10.15252/emmm.201910923), 2019-11-11
Supplement: EMMM-11-e10923-s009.pdf [file EMMM-11-e10923-s009.pdf]

Figure 7A: Survival of RIP1-Tag5 mice (weeks)

|           |      |
|-----------|------|
| Untreated | 25.7 |
| Untreated | 27   |
| Untreated | 27.1 |
| Untreated | 27.3 |
| Untreated | 27.4 |
| Untreated | 27.9 |
| Untreated | 29.6 |
| Untreated | 30   |
| Untreated | 30   |
| Untreated | 30.1 |
| Untreated | 30.4 |
| Untreated | 30.4 |
| Untreated | 31   |
| Untreated | 31   |
| Untreated | 31   |
| Untreated | 31   |
| Untreated | 26.6 |
| Untreated | 26.6 |
| Untreated | 26.7 |
| Untreated | 26.7 |
| Untreated | 26.7 |
| Untreated | 26.9 |
| Untreated | 27.3 |
| Untreated | 28.1 |
| Untreated | 28.4 |
| Untreated | 28.6 |
| Untreated | 29.4 |

|              |      |
|--------------|------|
| TNF-CSG 5 ug | 33.6 |
| TNF-CSG 5 ug | 29.9 |
| TNF-CSG 5 ug | 32.6 |
| TNF-CSG 5 ug | 32.7 |
| TNF-CSG 5 ug | 32.3 |
| TNF-CSG 5 ug | 30.7 |
| TNF-CSG 5 ug | 29.9 |
| TNF-CSG 5 ug | 31.9 |
| TNF-CSG 5 ug | 28.4 |
| TNF-CSG 5 ug | 26.4 |
| TNF-CSG 5 ug | 29.7 |
| TNF-CSG 5 ug | 30.7 |
| TNF-CSG 5 ug | 30.3 |
| TNF-CSG 5 ug | 31.7 |
| TNF-CSG 5 ug | 35.4 |
| TNF-CSG 5 ug | 36   |

Comparison of Survival Curves

|                                   |                 |                  |
|-----------------------------------|-----------------|------------------|
| <b>Log-rank (Mantel-Cox) test</b> |                 |                  |
| Chi square                        | 14.23           |                  |
| df                                | 1               |                  |
| P value                           | 0.0002          |                  |
| P value summary                   | ***             |                  |
| sig different?                    | Yes             |                  |
| Gehan-Breslow-Wilcoxon test       |                 |                  |
| Chi square                        | 11.42           |                  |
| df                                | 1               |                  |
| P value                           | 0.0007          |                  |
| P value summary                   | ***             |                  |
| sig different?                    | Yes             |                  |
| Median survival                   |                 |                  |
| Untreated                         | 28.1            |                  |
| TNF-CSG5 ug                       | 31.2            |                  |
| Ratio (and its reciprocal)        | 0.9006          | 1.11             |
| 95% CI of ratio                   | 0.4853 to 1.672 | 0.5983 to 2.061  |
| Hazard Ratio (Mantel-Ha           |                 |                  |
|                                   | A/B             | B/A              |
| Ratio (and its reciprocal)        | 3.837           | 0.2606           |
| 95% CI of ratio                   | 1.908 to 7.716  | 0.1296 to 0.5242 |

|                            |                |                  |
|----------------------------|----------------|------------------|
|                            |                |                  |
| Hazard Ratio (logrank)     | A/B            | B/A              |
| Ratio (and its reciprocal) | 2.732          | 0.366            |
| 95% CI of ratio            | 1.477 to 5.055 | 0.1978 to 0.6771 |

**Figure 7B: Survival of 4T1 tumour-bearing mice (days)**

|           |    |              |    |
|-----------|----|--------------|----|
| Untreated | 16 | TNF CSG 2 ug | 22 |
| Untreated | 18 | TNF CSG 2 ug | 23 |
| Untreated | 18 | TNF CSG 2 ug | 23 |
| Untreated | 18 | TNF CSG 2 ug | 25 |
| Untreated | 19 | TNF CSG 2 ug | 26 |
| Untreated | 19 |              |    |
| Untreated | 20 |              |    |

| Comparison of Survival Curves          |                 |                   |
|----------------------------------------|-----------------|-------------------|
| Log-rank (Mantel-Cox) test             |                 |                   |
| Chi square                             | 10.83           |                   |
| df                                     | 1               |                   |
| P value                                | 0.001           |                   |
| P value summary                        | **              |                   |
| Are the survival curves sig different? | Yes             |                   |
| Gehan-Breslow-Wilcoxon test            |                 |                   |
| Chi square                             | 8.895           |                   |
| df                                     | 1               |                   |
| P value                                | 0.0029          |                   |
| P value summary                        | **              |                   |
| Are the survival curves sig different? | Yes             |                   |
| Median survival                        |                 |                   |
| Untreated                              | 18              |                   |
| TNF-CSG                                | 23              |                   |
| Ratio (and its reciprocal)             | 0.7826          | 1.278             |
| 95% CI of ratio                        | 0.2484 to 2.466 | 0.4055 to 4.026   |
| Hazard Ratio (Mantel-Ha)               | A/B             | B/A               |
| Ratio (and its reciprocal)             | 16.48           | 0.06067           |
| 95% CI of ratio                        | 3.105 to 87.48  | 0.01143 to 0.3221 |
| Hazard Ratio (logrank)                 | A/B             | B/A               |
| Ratio (and its reciprocal)             | 3.957           | 0.2527            |
| 95% CI of ratio                        | 1.092 to 14.34  | 0.06973 to 0.9161 |

**Figure 7C: tumour volume**

| Untreated | CSG      | TNF-CSG 2 ug |
|-----------|----------|--------------|
| 386.5375  | 486.5255 | 375.17       |
| 247.009   | 318.3236 | 158.3839     |
| 443.576   | 381.8561 | 91.39235     |
| 332.82    | 227.8194 | 66.67699     |
| 690.9705  | 234.4322 | 69.02592     |
|           | 648      | 247.45       |

|  |        |       |
|--|--------|-------|
|  | 433.5  | 364.5 |
|  | 281.75 | 100   |
|  | 368    | 100   |
|  | 379.75 | 171.5 |
|  |        | 245   |

**One-way ANOVA nonparametric multiple comparison**

**Kruskal-Wallis test**

|                                  |                 |              |                 |                  |    |  |
|----------------------------------|-----------------|--------------|-----------------|------------------|----|--|
| Number of families               | 1               |              |                 |                  |    |  |
| Number of comparisons            | 3               |              |                 |                  |    |  |
| Alpha                            | 0.05            |              |                 |                  |    |  |
| Dunn's multiple comparisons test | Mean rank diff. | Significant? | Summary         | Adjusted P Value |    |  |
| Untreated 5 vs. CSG              | 2.1             | No           | ns              | >0.9999          |    |  |
| Untreated 5 vs. TNF-CSG          | 11.56           | Yes          | *               | 0.0152           |    |  |
| CSG vs. TNF-CSG                  | 9.464           | Yes          | *               | 0.0139           |    |  |
| Test details                     | Mean rank 1     | Mean rank 2  | Mean rank diff. | n1               | n2 |  |
| Untreated 5 vs. CSG              | 19.2            | 17.1         | 2.1             | 5                | 10 |  |
| Untreated 5 vs. TNF-CSG          | 19.2            | 7.636        | 11.56           | 5                | 11 |  |
| CSG vs. TNF-CSG                  | 17.1            | 7.636        | 9.464           | 10               | 11 |  |

**Figure 7D: FACS analysis of granzyme B cytotoxic T cells and regulatory CD4 T cells**

**CD8 T cells granzyme B+**

| CSG  | TNF-CSG 2 ug |
|------|--------------|
| 0.55 | 15.2         |
| 2.47 | 16.8         |
| 1.62 | 22.1         |
| 5.65 | 13.2         |
| 0.28 | 29           |

**CD4 T cells granzyme B+**

| CSG   | TNF-CSG 2 ug |
|-------|--------------|
| 2.83  | 3.92         |
| 0.633 | 3.1          |
| 0.526 | 2.74         |
| 1.79  | 2.89         |
| 1.19  | 2.04         |

**Unpaired t-test**

| Table Analyzed                      | CD8 GranzymeB |
|-------------------------------------|---------------|
| Column B                            | TNF-CSG 2 ug  |
| vs.                                 | vs.           |
| Column A                            | CSG           |
| Unpaired t test                     |               |
| P value                             | 0.0005        |
| P value summary                     | ***           |
| Significantly different (P < 0.05)? | Yes           |
| One- or two-tailed P value?         | Two-tailed    |
| t, df                               | t=5.701 df=8  |

| Table Analyze                       | CD4 GranzymeB |
|-------------------------------------|---------------|
| Column B                            | TNF-CSG 2 ug  |
| vs.                                 | vs.           |
| Column A                            | CSG           |
| Unpaired t test                     |               |
| P value                             | 0.0181        |
| P value summary                     | *             |
| Significantly different (P < 0.05)? | Yes           |
| One- or two-tai                     | Two-tailed    |
| t, df                               | t=2.963 df=8  |

**CD4 T cells FoxP3+**

| CSG  | TNF-CSG 2 ug |
|------|--------------|
| 13.1 | 12.7         |
| 15.9 | 2.17         |
| 11.1 | 10.3         |
| 9.73 | 10.3         |
| 12.4 | 11.9         |

### Unpaired t-test

| Table Analyzed                      | CD4: CD25+ FOXP3+ |  |
|-------------------------------------|-------------------|--|
|                                     |                   |  |
| Column B                            | TNF-CSG 2 ug      |  |
| vs.                                 | vs.               |  |
| Column A                            | CSG               |  |
|                                     |                   |  |
| Unpaired t test                     |                   |  |
| P value                             | 0.2045            |  |
| P value summary                     | ns                |  |
| Significantly different (P < 0.05)? | No                |  |
| One- or two-tailed P value          | Two-tailed        |  |
| t, df                               | t=1.382 df=8      |  |
