# Supplementary material for: Immune‐mediated ECM depletion improves tumour perfusion and payload delivery
Source: PubMed Central journal article supplement (PMC6895610; doi:10.15252/emmm.201910923), 2019-11-11
Supplement: EMMM-11-e10923-s010.pdf [file EMMM-11-e10923-s010.pdf]

Figure 8C: Treatment of 4T1 tumour in BALB/C nude  
CD4 (purple)/nuclei (methyl green)

Adoptive  
transfer of CD4  
and CD8 T cells

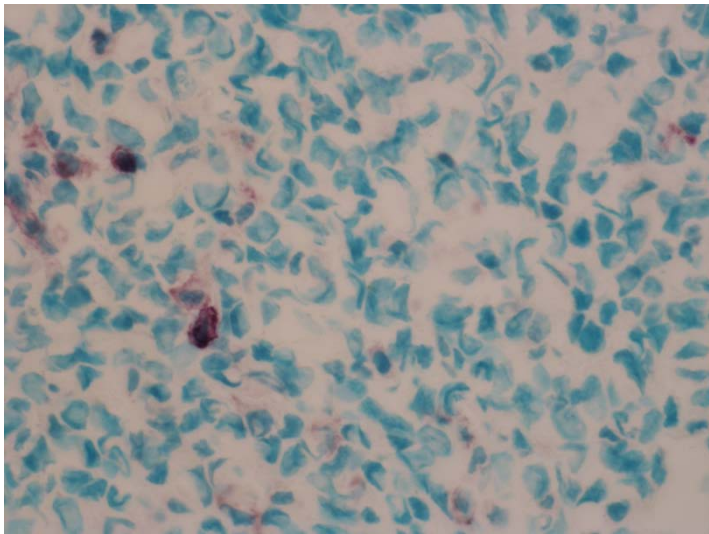

TNF-CSG only

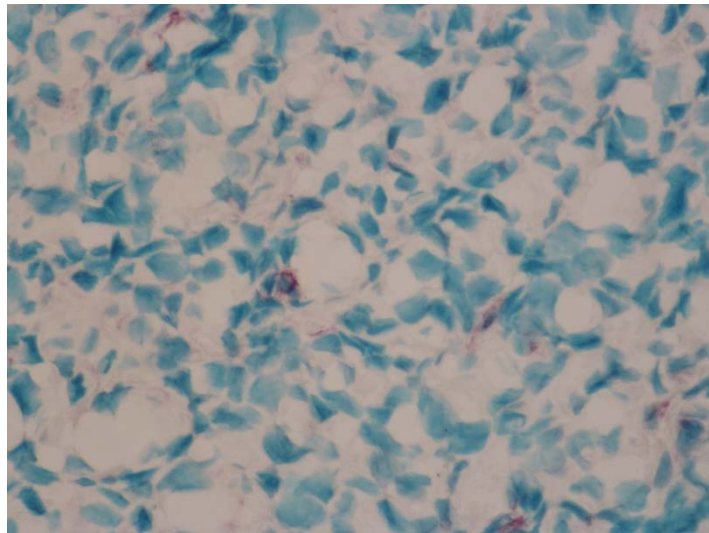

TNF-CSG +  
CD4 and CD8 T  
cells

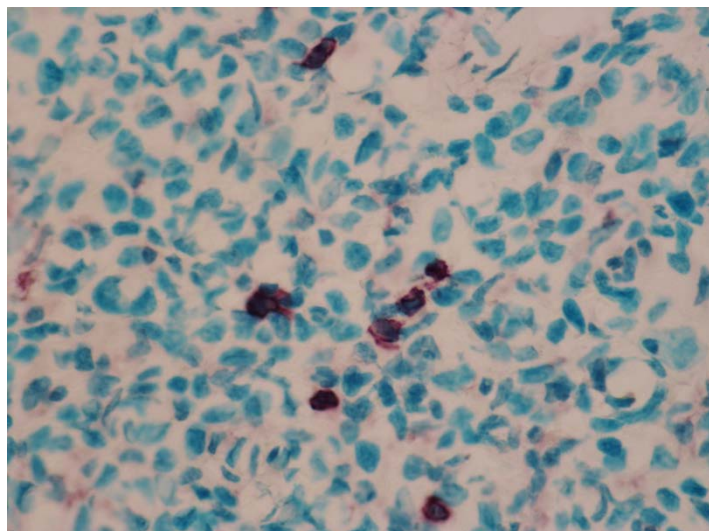

Figure 8C: Treatment of 4T1 tumour in BALB/C nude  
CD8 (purple)/nuclei (methyl green)

Adoptive  
transfer of CD4  
and CD8 T cells

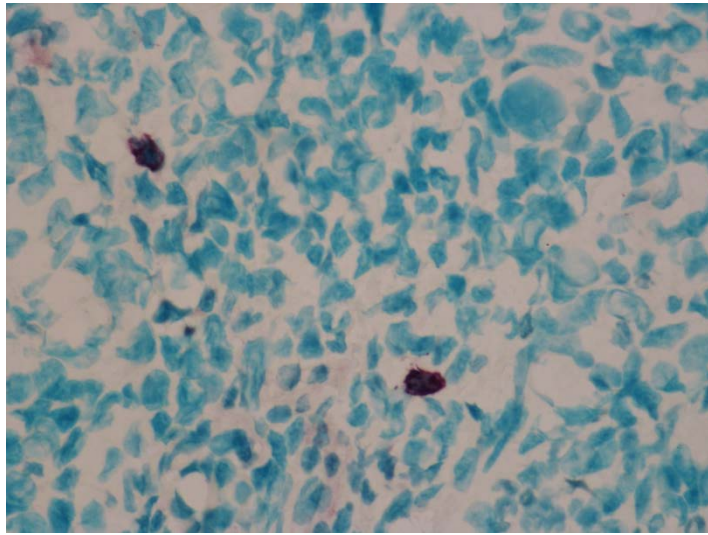

TNF-CSG only

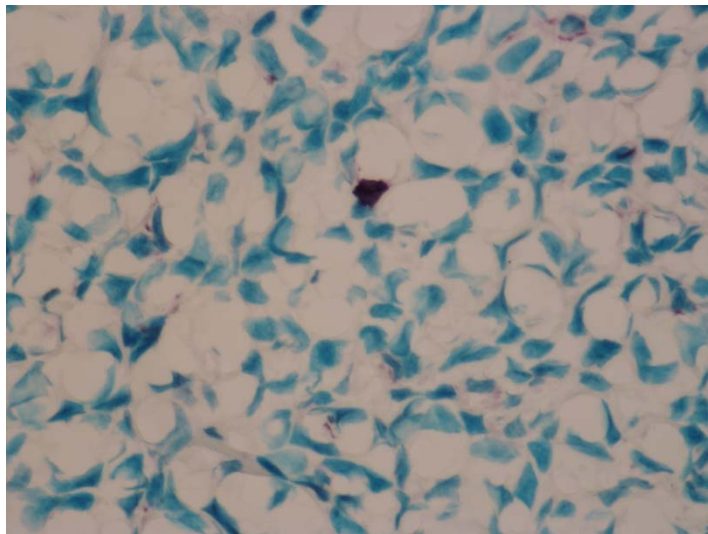

TNF-CSG +  
CD4 and CD8 T  
cells

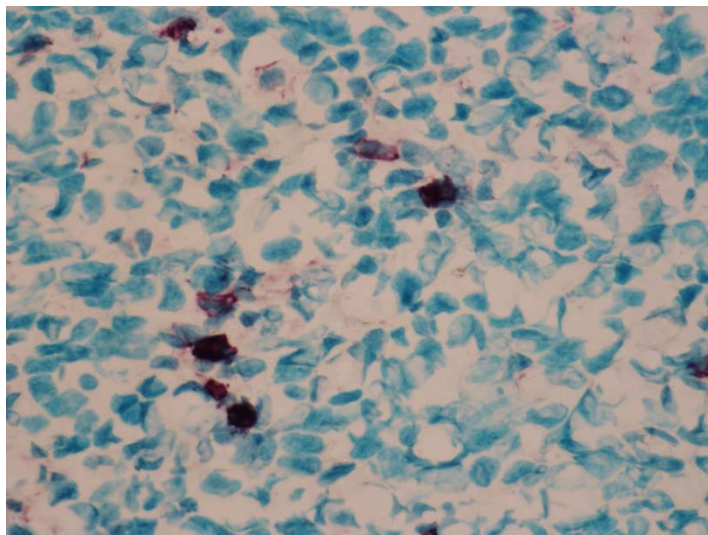

Figure 8D: Treatment of 4T1 tumour in BALB/C nude  
Col IV (purple)/nuclei (methyl green)

Untreated

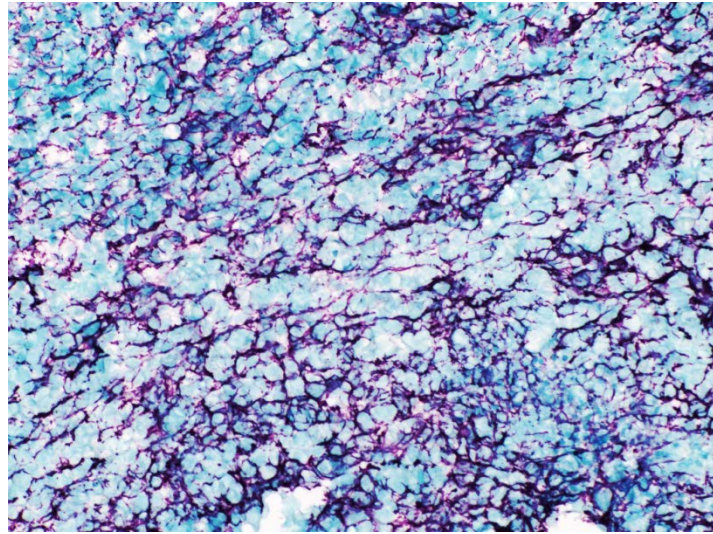

Adoptive  
transfer of CD4  
and CD8 T cells

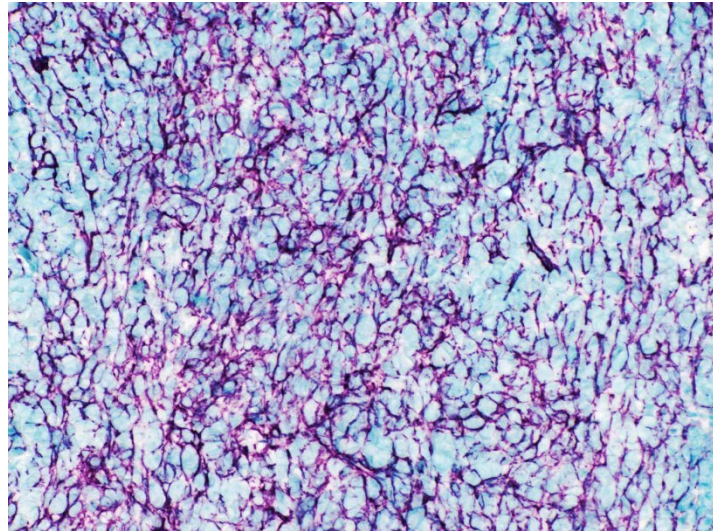

TNF-CSG only

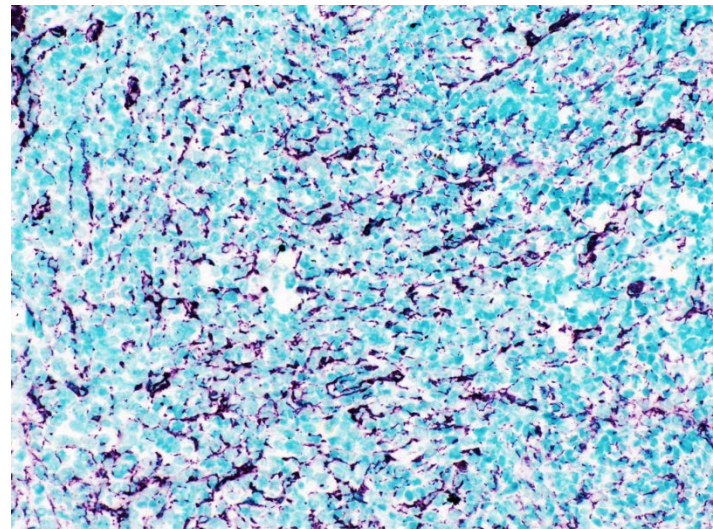

Figure 8D: Treatment of 4T1 tumour in BALB/C nude

Col IV (purple)/nuclei (methyl green)

TNF-CSG +  
CD4 T cells

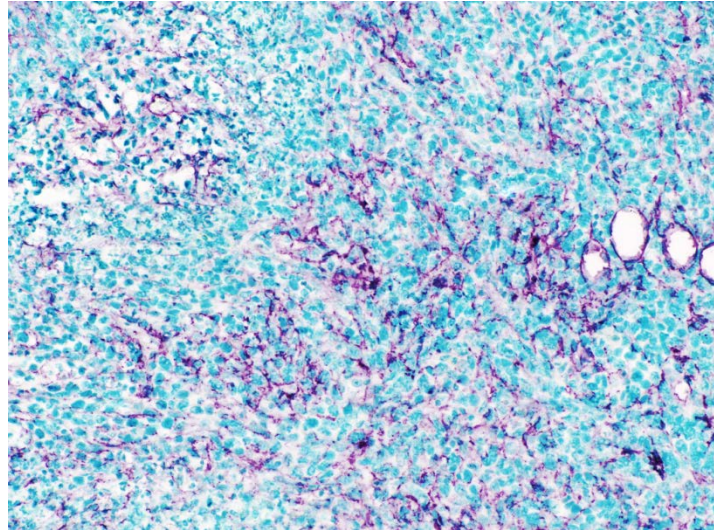

TNF-CSG +  
CD8 T cells

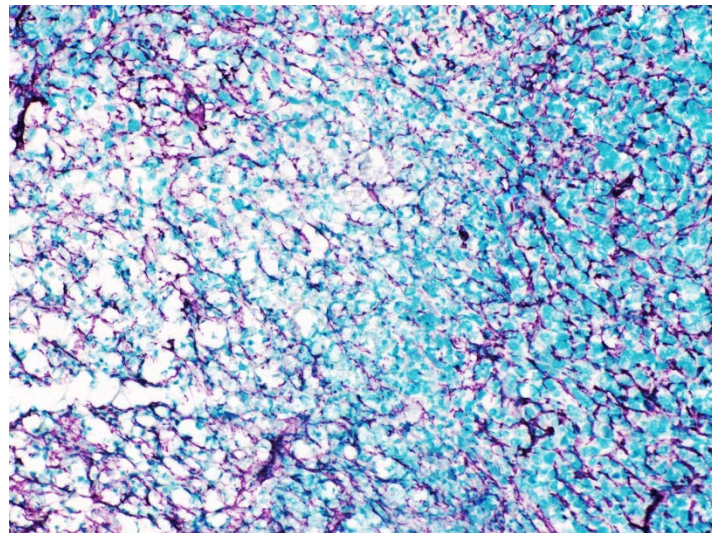

TNF-CSG +  
CD4 and CD8 T cells

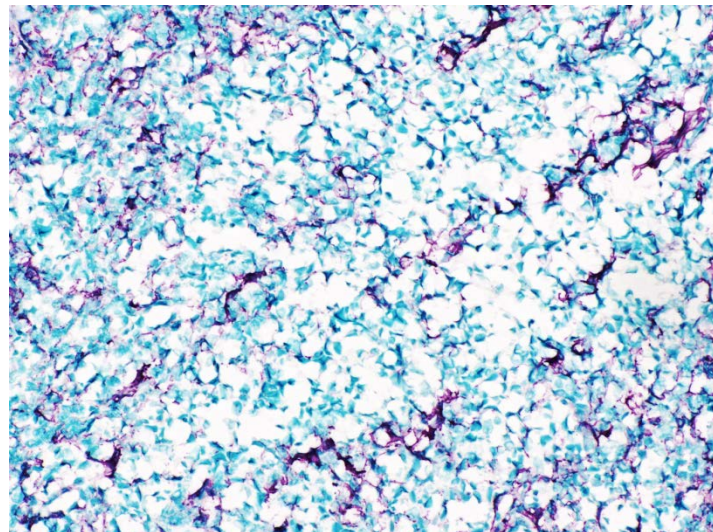

Figure 8 B: measured tumour weights

| Untreated | CD4+ CD8 transfer | TNF-CSG | CD4 transfer+ TNF-CSG | CD8 transfer + TNF-CSG | CD4+ CD8 transfer + TNF-CSG |
|-----------|-------------------|---------|-----------------------|------------------------|-----------------------------|
| 0.44      | 0.35              | 0.2     | 0.27                  | 0.3                    | 0.21                        |
| 0.28      | 0.35              | 0.29    | 0.19                  | 0.21                   | 0.23                        |
| 0.32      | 0.36              | 0.41    | 0.35                  | 0.27                   | 0.21                        |
| 0.46      | 0.34              | 0.37    | 0.37                  | 0.41                   | 0.21                        |
| 0.4       | 0.37              | 0.23    | 0.36                  | 0.36                   | 0.2                         |

One-way ANOVA multiple comparison

| Uncorrected Fisher's LSD            | Mean Diff. | 95.00% CI of diff. | Significant? | Summary | Individual P Value |
|-------------------------------------|------------|--------------------|--------------|---------|--------------------|
| UNTR vs. CD4+CD8                    | 0.021      | -0.06006 to 0.1    | No           | ns      | 0.5984             |
| UNTR vs. TNF-CSG                    | 0.075      | -0.006064 to 0     | No           | ns      | 0.0683             |
| UNTR vs. TNF-CSG + CD4              | 0.067      | -0.01406 to 0.1    | No           | ns      | 0.1011             |
| UNTR vs. TNF-CSG + CD8              | 0.065      | -0.01606 to 0.1    | No           | ns      | 0.1112             |
| UNTR vs. TNF-CSG + CD4+CD8          | 0.163      | 0.08194 to 0.2     | Yes          | ***     | 0.0003             |
| CD4+CD8 vs. TNF-CSG                 | 0.054      | -0.03067 to 0.1    | No           | ns      | 0.2009             |
| CD4+CD8 vs. TNF-CSG + CD4           | 0.046      | -0.03867 to 0.1    | No           | ns      | 0.2738             |
| CD4+CD8 vs. TNF-CSG + CD8           | 0.044      | -0.04067 to 0.1    | No           | ns      | 0.2947             |
| CD4+CD8 vs. TNF-CSG + CD4+CD8       | 0.142      | 0.05733 to 0.2     | Yes          | **      | 0.002              |
| TNF-CSG vs. TNF-CSG + CD4           | -0.008     | -0.09267 to 0.0    | No           | ns      | 0.8473             |
| TNF-CSG vs. TNF-CSG + CD8           | -0.01      | -0.09467 to 0.0    | No           | ns      | 0.8098             |
| TNF-CSG vs. TNF-CSG + CD4+CD8       | 0.088      | 0.003331 to 0.1    | Yes          | *       | 0.0422             |
| TNF-CSG + CD4 vs. TNF-CSG + CD8     | -0.002     | -0.08667 to 0.0    | No           | ns      | 0.9616             |
| TNF-CSG + CD4 vs. TNF-CSG + CD4+CD8 | 0.096      | 0.01133 to 0.1     | Yes          | *       | 0.0279             |
| TNF-CSG + CD8 vs. TNF-CSG + CD4+CD8 | 0.098      | 0.01333 to 0.1     | Yes          | *       | 0.025              |

Figure 8 B: measured tumour volume

| Untreated | CD4+ CD8 transfer | TNF-CSG | CD4 transfer+ TNF-CSG | CD8 transfer + TNF-CSG | CD4+ CD8 transfer + TNF-CSG |
|-----------|-------------------|---------|-----------------------|------------------------|-----------------------------|
| 380.9     | 242.8             | 190.2   | 294.3                 | 222.9                  | 236.8                       |
| 224.3     | 291.7             | 392.9   | 156.7                 | 182.6                  | 199.1                       |
| 231.3     | 330               | 411.4   | 252.4                 | 311.4                  | 178.5                       |
| 368.8     | 271.3             | 299.6   | 289                   | 241                    | 174.6                       |
| 273.6     | 305.2             | 204.5   | 235.8                 | 232.6                  | 212.4                       |
| 477.7     |                   |         |                       |                        |                             |

One-way ANOVA multiple comparison

| Uncorrected Fisher's LSD            | Mean Diff. | 95.00% CI of diff. | Significant? | Summary | Individual P Value |
|-------------------------------------|------------|--------------------|--------------|---------|--------------------|
| UNTR vs. CD4+CD8                    | 37.9       | -48.56 to 124.4    | No           | ns      | 0.3753             |
| UNTR vs. TNF-CSG                    | 26.38      | -60.08 to 112.8    | No           | ns      | 0.5355             |
| UNTR vs. TNF-CSG + CD4              | 80.46      | -6.002 to 166.9    | No           | ns      | 0.0668             |
| UNTR vs. TNF-CSG + CD8              | 88         | 1.538 to 174.5     | Yes          | *       | 0.0464             |
| UNTR vs. TNF-CSG + CD4+CD8          | 125.8      | 39.36 to 212.3     | Yes          | **      | 0.0061             |
| CD4+CD8 vs. TNF-CSG                 | -11.52     | -101.8 to 78.79    | No           | ns      | 0.7949             |
| CD4+CD8 vs. TNF-CSG + CD4           | 42.56      | -47.75 to 132.9    | No           | ns      | 0.341              |
| CD4+CD8 vs. TNF-CSG + CD8           | 50.1       | -40.21 to 140.4    | No           | ns      | 0.264              |
| CD4+CD8 vs. TNF-CSG + CD4+CD8       | 87.92      | -2.387 to 178.2    | No           | ns      | 0.0559             |
| TNF-CSG vs. TNF-CSG + CD4           | 54.08      | -36.23 to 144.4    | No           | ns      | 0.2289             |
| TNF-CSG vs. TNF-CSG + CD8           | 61.62      | -28.69 to 151.9    | No           | ns      | 0.1722             |
| TNF-CSG vs. TNF-CSG + CD4+CD8       | 99.44      | 9.133 to 189.7     | Yes          | *       | 0.0322             |
| TNF-CSG + CD4 vs. TNF-CSG + CD8     | 7.54       | -82.77 to 97.85    | No           | ns      | 0.8649             |
| TNF-CSG + CD4 vs. TNF-CSG + CD4+CD8 | 45.36      | -44.95 to 135.7    | No           | ns      | 0.3108             |
| TNF-CSG + CD8 vs. TNF-CSG + CD4+CD8 | 37.82      | -52.49 to 128.1    | No           | ns      | 0.3966             |

Figure 8C: Counts of immune cells/field of tumour area

|     | Untreated |   |   | CD4+ CD8 transfer |   |   | TNF-CSG |   |   | CD4 transfer+ TNF-CSG |    |    | CD8 transfer + TNF-CSG |   |   | CD4+ CD8 transfer + TNF-CSG |    |    |
|-----|-----------|---|---|-------------------|---|---|---------|---|---|-----------------------|----|----|------------------------|---|---|-----------------------------|----|----|
| CD4 | 3         | 0 | 2 | 6                 | 1 | 2 | 2       | 2 | 4 | 9                     | 11 | 11 | 3                      | 0 | 3 | 8                           | 15 | 11 |
| CD8 | 4         | 1 | 0 | 5                 | 1 | 1 | 5       | 2 | 3 | 5                     | 5  | 2  | 8                      | 8 | 6 | 20                          | 11 | 8  |

One-way ANOVA multiple comparison

Number of families 1  
 Number of comparisons per family 15  
 Alpha 0.05

CD4 T cells

| Tukey's multiple comparisons test   | Mean Diff. | 95.00% CI of diff. | Significant? | Summary | Adjusted P Value |
|-------------------------------------|------------|--------------------|--------------|---------|------------------|
| UNTR vs. CD4+CD8                    | -1.333     | -7.187 to 4.52     | No           | ns      | 0.9685           |
| UNTR vs. TNF-CSG                    | -1         | -6.854 to 4.854    | No           | ns      | 0.991            |
| UNTR vs. TNF-CSG + CD4              | -8.667     | -14.52 to -2.81    | Yes          | **      | 0.0034           |
| UNTR vs. TNF-CSG + CD8              | -0.3333    | -6.187 to 5.52     | No           | ns      | >0.9999          |
| UNTR vs. TNF-CSG + CD4+CD8          | -9.667     | -15.52 to -3.81    | Yes          | **      | 0.0014           |
| CD4+CD8 vs. TNF-CSG                 | 0.3333     | -5.52 to 6.187     | No           | ns      | >0.9999          |
| CD4+CD8 vs. TNF-CSG + CD4           | -7.333     | -13.19 to -1.48    | Yes          | *       | 0.0119           |
| CD4+CD8 vs. TNF-CSG + CD8           | 1          | -4.854 to 6.854    | No           | ns      | 0.991            |
| CD4+CD8 vs. TNF-CSG + CD4+CD8       | -8.333     | -14.19 to -2.48    | Yes          | **      | 0.0046           |
| TNF-CSG vs. TNF-CSG + CD4           | -7.667     | -13.52 to -1.81    | Yes          | **      | 0.0087           |
| TNF-CSG vs. TNF-CSG + CD8           | 0.6667     | -5.187 to 6.52     | No           | ns      | 0.9986           |
| TNF-CSG vs. TNF-CSG + CD4+CD8       | -8.667     | -14.52 to -2.81    | Yes          | **      | 0.0034           |
| TNF-CSG + CD4 vs. TNF-CSG + CD8     | 8.333      | 2.48 to 14.19      | Yes          | **      | 0.0046           |
| TNF-CSG + CD4 vs. TNF-CSG + CD4+CD8 | -1         | -6.854 to 4.854    | No           | ns      | 0.991            |
| TNF-CSG + CD8 vs. TNF-CSG + CD4+CD8 | -9.333     | -15.19 to -3.48    | Yes          | **      | 0.0018           |

CD8 T cells

| Tukey's multiple comparisons test | Mean Diff. | 95.00% CI of diff. | Significant? | Summary | Adjusted P Value |
|-----------------------------------|------------|--------------------|--------------|---------|------------------|
| UNTR vs. CD4+CD8                  | -0.6667    | -8.995 to 7.662    | No           | ns      | 0.9998 A-B       |
| UNTR vs. TNF-CSG                  | -1.667     | -9.995 to 6.662    | No           | ns      | 0.9819 A-C       |

|                                     |         |                 |     |    |        |     |
|-------------------------------------|---------|-----------------|-----|----|--------|-----|
| UNTR vs. TNF-CSG + CD4              | -2.333  | -10.66 to 5.995 | No  | ns | 0.9278 | A-D |
| UNTR vs. TNF-CSG + CD8              | -5.667  | -14 to 2.662    | No  | ns | 0.2709 | A-E |
| UNTR vs. TNF-CSG + CD4+CD8          | -11.33  | -19.66 to -3.00 | Yes | ** | 0.0065 | A-F |
| CD4+CD8 vs. TNF-CSG                 | -1      | -9.329 to 7.329 | No  | ns | 0.9983 | B-C |
| CD4+CD8 vs. TNF-CSG + CD4           | -1.667  | -9.995 to 6.662 | No  | ns | 0.9819 | B-D |
| CD4+CD8 vs. TNF-CSG + CD8           | -5      | -13.33 to 3.329 | No  | ns | 0.3874 | B-E |
| CD4+CD8 vs. TNF-CSG + CD4+CD8       | -10.67  | -19 to -2.338   | Yes | *  | 0.0102 | B-F |
| TNF-CSG vs. TNF-CSG + CD4           | -0.6667 | -8.995 to 7.662 | No  | ns | 0.9998 | C-D |
| TNF-CSG vs. TNF-CSG + CD8           | -4      | -12.33 to 4.329 | No  | ns | 0.6058 | C-E |
| TNF-CSG vs. TNF-CSG + CD4+CD8       | -9.667  | -18 to -1.338   | Yes | *  | 0.0201 | C-F |
| TNF-CSG + CD4 vs. TNF-CSG + CD8     | -3.333  | -11.66 to 4.995 | No  | ns | 0.7568 | D-E |
| TNF-CSG + CD4 vs. TNF-CSG + CD4+CD8 | -9      | -17.33 to -0.67 | Yes | *  | 0.0317 | D-F |
| TNF-CSG + CD8 vs. TNF-CSG + CD4+CD8 | -5.667  | -14 to 2.662    | No  | ns | 0.2709 | E-F |

Figure 8D: % Col-IV staining/field of tumour area

| Untreated | CD4+ CD8 transfer | TNF-CSG | CD4 transfer+ TNF-CSG | CD8 transfer + TNF-CSG | CD4+ CD8 transfer + TNF-CSG |
|-----------|-------------------|---------|-----------------------|------------------------|-----------------------------|
| 28.6      | 27.7              | 12.2    | 8.1                   | 6.8                    | 10.5                        |
| 35.3      | 32.5              | 19.4    | 13.8                  | 20.4                   | 8.3                         |
| 31.5      | 31.6              | 25.4    | 12.3                  | 17.7                   | 13.5                        |
| 31.1      | 25.9              | 20.1    | 16.7                  | 14.2                   | 3.1                         |
| 22.7      | 27.1              | 16.8    | 12.7                  | 14.6                   | 9.3                         |

One-way ANOVA multiple comparison

|                                  |      |
|----------------------------------|------|
| Number of families               | 1    |
| Number of comparisons per family | 15   |
| Alpha                            | 0.05 |

| Tukey's multiple comparisons test   | Mean Diff. | 95.00% CI of diff. | Significant? | Summary | Adjusted P Value |
|-------------------------------------|------------|--------------------|--------------|---------|------------------|
| UNTR vs. CD4+CD8                    | 0.88       | -7.245 to 9.005    | No           | ns      | 0.9994           |
| UNTR vs. TNF-CSG                    | 11.06      | 2.935 to 19.18     | Yes          | **      | 0.0037           |
| UNTR vs. TNF-CSG + CD4              | 17.12      | 8.995 to 25.24     | Yes          | ****    | <0.0001          |
| UNTR vs. TNF-CSG + CD8              | 15.1       | 6.975 to 23.22     | Yes          | ****    | <0.0001          |
| UNTR vs. TNF-CSG + CD4+CD8          | 20.9       | 12.78 to 29.02     | Yes          | ****    | <0.0001          |
| CD4+CD8 vs. TNF-CSG                 | 10.18      | 2.055 to 18.3      | Yes          | **      | 0.0084           |
| CD4+CD8 vs. TNF-CSG + CD4           | 16.24      | 8.115 to 24.36     | Yes          | ****    | <0.0001          |
| CD4+CD8 vs. TNF-CSG + CD8           | 14.22      | 6.095 to 22.34     | Yes          | ***     | 0.0002           |
| CD4+CD8 vs. TNF-CSG + CD4+CD8       | 20.02      | 11.9 to 28.14      | Yes          | ****    | <0.0001          |
| TNF-CSG vs. TNF-CSG + CD4           | 6.06       | -2.065 to 14.18    | No           | ns      | 0.2302           |
| TNF-CSG vs. TNF-CSG + CD8           | 4.04       | -4.085 to 12.16    | No           | ns      | 0.6448           |
| TNF-CSG vs. TNF-CSG + CD4+CD8       | 9.84       | 1.715 to 17.96     | Yes          | *       | 0.0114           |
| TNF-CSG + CD4 vs. TNF-CSG + CD8     | -2.02      | -10.14 to 6.105    | No           | ns      | 0.9702           |
| TNF-CSG + CD4 vs. TNF-CSG + CD4+CD8 | 3.78       | -4.345 to 11.9     | No           | ns      | 0.7042           |
| TNF-CSG + CD8 vs. TNF-CSG + CD4+CD8 | 5.8        | -2.325 to 13.92    | No           | ns      | 0.271            |
